# Supplementary material for: Silver-catalyzed monofluoroalkylation of heteroarenes with α-fluorocarboxylic acids: an insight into the solvent effect
Source: Royal Society of Chemistry journal article supplement (doi:10.1039/d1cc06466e), 2021-12-18

# Supporting Information

## Table of Contents

|                                                                                              |    |
|----------------------------------------------------------------------------------------------|----|
| 1. General Information and Materials .....                                                   | 2  |
| 2. Optimization of Monofluoroalkylation Reaction.....                                        | 5  |
| 3. Substrate Scope of Monofluoroalkylation Reaction .....                                    | 7  |
| 4. Substrate Scope of Bis-monofluoroalkylation Reaction .....                                | 22 |
| 5. Control Experiments and Competition Experiments .....                                     | 29 |
| 5.1 Control Experiments of Bis-fluoroalkylation.....                                         | 29 |
| 5.2 Competition Experiments.....                                                             | 29 |
| 6. Radical Inhibition Experiments and Plausible Reaction Mechanism .....                     | 34 |
| 7. References .....                                                                          | 36 |
| 8. $^1\text{H}$ , $^{19}\text{F}$ and $^{13}\text{C}$ NMR Spectra of Isolated Products ..... | 37 |

## 1. General Information and Materials

**General information:**  $^1\text{H}$ ,  $^{13}\text{C}$  and  $^{19}\text{F}$  NMR spectra were recorded on a 400 MHz NMR spectrometer.  $^1\text{H}$  NMR spectroscopy chemical shifts were determined relative to internal  $\text{Me}_4\text{Si}$  (TMS) at  $\delta$  0.0 or to the signal of the residual protonated solvent  $\text{CDCl}_3$   $\delta$  7.26.  $^{13}\text{C}$  NMR spectroscopy chemical shifts were determined relative to the signal of  $\text{CDCl}_3$   $\delta$  77.0. For the reaction mixtures,  $^{19}\text{F}$  NMR spectroscopy chemical shifts were determined relative to  $\text{PhCF}_3$  at  $\delta$  -62.0. Data for  $^1\text{H}$ ,  $^{13}\text{C}$  and  $^{19}\text{F}$  NMR spectra are recorded as follows: chemical shift ( $\delta$ , ppm), multiplicity (s = singlet, d = doublet, t = triplet, m = multiplet, q = quartet, br = broad, hept = heptet). FT-IR spectra were obtained with a Nicolet 5700 spectrophotometer. GC-MS data were recorded on a Finnigan 4021 instrument and GCMS-QP2010. Melting points were recorded on a SGW X-4 melting point apparatus and are uncorrected. High-resolution mass spectral (HRMS) were collected on Waters Micromass GCT Premier and Bruker MicroTof Q II 10410. All reactions were monitored by TLC or  $^{19}\text{F}$  NMR spectroscopy.

**Materials:** Commercial reagents and solvents were used without further purification. 2-Fluoroacetic acid ( $\text{FCH}_2\text{CO}_2\text{H}$ , **1a**) and 2-fluoro-2-methylpropanoic acid ( $\text{Me}_2\text{CFCO}_2\text{H}$ , **1c**) were prepared with a similar procedure to the literature.<sup>1</sup> 2-Fluoropropanoic acid ( $\text{MeCHFCH}_2\text{CO}_2\text{H}$ , **1b**) was prepared with a similar procedure to the literature.<sup>2</sup>

### Procedure for the synthesis of $\text{FCH}_2\text{CO}_2\text{H}$ (**1a**)

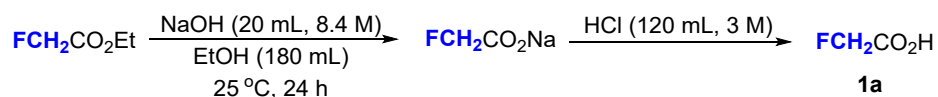

A solution of ethyl fluoroacetate ( $\text{FCH}_2\text{CO}_2\text{Et}$ ) (13.6 mL, 141 mmol) in EtOH (180 mL) was treated with 20 mL of aqueous NaOH (8.4 M) and stirred at room temperature for 24 h. The solvent was rotary evaporated to dryness. The sodium fluoroacetate thus obtained was redissolved in 120 mL of aqueous HCl (3 M), and then the solution was saturated with solid NaCl and then extracted with  $\text{Et}_2\text{O}$  (4×25 mL). The organic extract was dried with  $\text{MgSO}_4$ , filtered, and the filtrate was rotary evaporated to produce 2-

fluoroacetic acid as a clear oil. This crude product, which was still slightly wet, was redissolved in anhydrous Et<sub>2</sub>O, dried with copious amount of MgSO<sub>4</sub> overnight, filtered, and rotary evaporated to dryness to produce FCH<sub>2</sub>CO<sub>2</sub>H (5.0 g, 46% yield) as a colorless liquid. <sup>1</sup>H NMR (400 MHz, CDCl<sub>3</sub>): δ 4.91 (d, *J* = 46.8 Hz, 2H). <sup>19</sup>F NMR (376 MHz, CDCl<sub>3</sub>): δ -230.5 (t, *J*<sub>H-F</sub> = 47.0 Hz, 1F). **1a** is a known compound and has been reported in the previous paper.<sup>1</sup>

#### Procedure for the synthesis of MeCHFCO<sub>2</sub>H (**1b**)

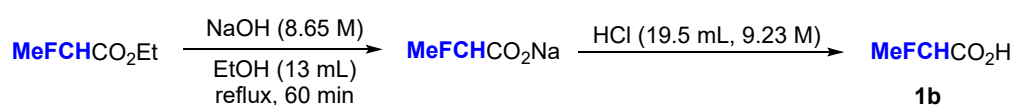

Sodium hydroxide (4.5 g, 112.5 mmol) was dissolved in water (13 mL) and ethyl 2-fluoropropionate (5.9 g, 49.1 mmol) was added together with ethanol (13 mL). The mixture was heated under reflux for 60 min, cooled to room temperature, and concentrated to a volume of about 10 mL under reduced pressure. Water (4.5 mL) and concentrated hydrochloric acid (9 mL) were added, and the product was extracted with diethyl ether (6×15 mL). The organic extract was dried with Na<sub>2</sub>SO<sub>4</sub>, diethyl ether was rotary evaporated to produce MeCHFCO<sub>2</sub>H (3.9 g, 81% yield) as a colorless oil. <sup>1</sup>H NMR (400 MHz, CDCl<sub>3</sub>): δ 4.90 (d, *J* = 48.4 Hz, 1H), 1.37 (dd, *J* = 24.0, 6.4 Hz, 3H). <sup>19</sup>F NMR (376 MHz, CDCl<sub>3</sub>): δ -185.3 (dq, *J*<sub>H-F</sub> = 48.9 Hz, 24.1 Hz, 1F). **1b** is a known compound and has been reported in the previous paper.<sup>2</sup>

#### Procedure for the Synthesis of Me<sub>2</sub>CFCO<sub>2</sub>H (**1c**)

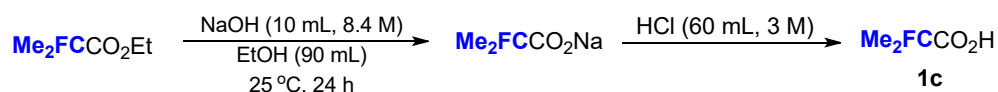

A solution of methyl 2-fluoro-2-methylpropanoate (Me<sub>2</sub>FCCO<sub>2</sub>Et) (6.3 mL, 70.5 mmol) in EtOH of 90 mL of anhydrous EtOH was treated with 10 mL of aqueous NaOH (8.4 M) and stirred at rt for 1 day. The solvent was rotary evaporated to dryness. The sodium fluoroacetate thus obtained was redissolved in 90 mL HCl of 3 M aqueous HCl, the solution was saturated with NaCl and then extracted four times with Et<sub>2</sub>O (4 × 15 mL). The organic extract was dried with MgSO<sub>4</sub>, filtered, and the filtrate was rotary

evaporated to produce 2-fluoro-2-methylpropanoic acid as a clear oil. This crude product, which was still slightly wet, was redissolved in anhydrous Et<sub>2</sub>O, dried with copious amount of MgSO<sub>4</sub> overnight, filtered, and rotary evaporated to dryness to produce Me<sub>2</sub>CFCO<sub>2</sub>H (4.2 g, 56% yield) as a colorless oil. <sup>1</sup>H NMR (400 MHz, CDCl<sub>3</sub>): δ 1.63 (d, *J* = 21.6 Hz, 6H). <sup>19</sup>F NMR (376 MHz, CDCl<sub>3</sub>): δ -148.2 (hept, *J*<sub>H-F</sub> = 21.3 Hz, 1F). **1c** is a known compound and has been reported in the previous paper.<sup>3</sup>

## 2. Optimization of Monofluoroalkylation Reaction

To a 10 mL of Schlenk tube were added  $\text{AgNO}_3$  (7.0 mg, 20 mol%) and  $\text{K}_2\text{S}_2\text{O}_8$  (1.0-5.0 equiv.). The mixture was evacuated and backfilled with  $\text{N}_2$  for three times, 4-picolinic acid ethyl ester (0.2 mmol, 1.0 equiv.), 2-fluoroacetic acid (2.0-3.0 equiv.) and solvent (1.5 mL) were then added. The Schlenk tube was screw capped and put into a preheated oil bath (50-100 °C). After stirring for 20 h, the reaction mixture was cooled to room temperature. Saturated solution of  $\text{NaHCO}_3$  (3 mL) was added and the mixture was extracted with ethyl acetate ( $3 \times 10$  mL). The organic layer was washed with brine (10 mL), dried with anhydrous  $\text{Na}_2\text{SO}_4$  and concentrated. The residue was purified by silica gel flash column chromatography to give product **3a**.

**Table S1. Optimization of solvents<sup>a</sup>**

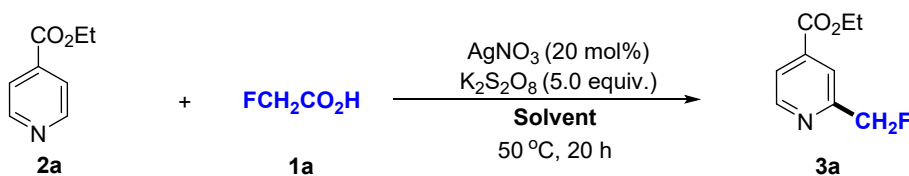

| Entry    | Solvent (v:v)                                     | Yield (%) |
|----------|---------------------------------------------------|-----------|
| 1        | DCE/ $\text{H}_2\text{O}$ (2:1)                   | 44        |
| <b>2</b> | <b>MeCN/<math>\text{H}_2\text{O}</math> (2:1)</b> | <b>52</b> |
| 3        | DCM/ $\text{H}_2\text{O}$ (2:1)                   | 35        |
| 4        | DMSO/ $\text{H}_2\text{O}$ (2:1)                  | 28        |
| 5        | dioxane/ $\text{H}_2\text{O}$ (2:1)               | <5        |
| 6        | DMF/ $\text{H}_2\text{O}$ (2:1)                   | 0         |
| 7        | toluene/ $\text{H}_2\text{O}$ (2:1)               | trace     |
| 8        | THF/ $\text{H}_2\text{O}$ (2:1)                   | 0         |
| 9        | MeCN/ $\text{H}_2\text{O}$ (3:1)                  | 48        |
| 10       | MeCN/ $\text{H}_2\text{O}$ (1:1)                  | 45        |

<sup>a</sup>Reaction conditions: **2a** (0.2 mmol, 1.0 equiv.), **1a** (0.4 mmol). Isolated yield.

**Table S2. Optimization of oxidants<sup>a</sup>**
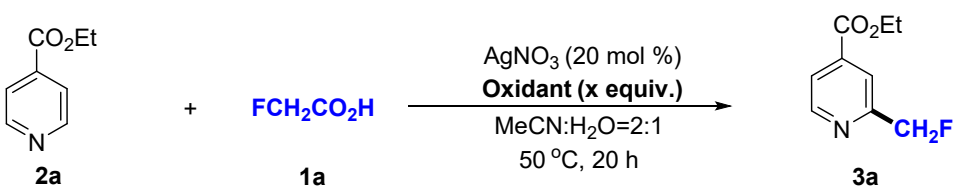

| Entry    | oxidant (x)                                                         | Yield (%) |
|----------|---------------------------------------------------------------------|-----------|
| 1        | K <sub>2</sub> S <sub>2</sub> O <sub>8</sub> (1.0)                  | 24        |
| 2        | K <sub>2</sub> S <sub>2</sub> O <sub>8</sub> (3.0)                  | 33        |
| <b>3</b> | <b>K<sub>2</sub>S<sub>2</sub>O<sub>8</sub> (5.0)</b>                | <b>52</b> |
| 4        | (NH <sub>4</sub> ) <sub>2</sub> S <sub>2</sub> O <sub>8</sub> (5.0) | 32        |
| 5        | <sup>t</sup> BuOOH (5.0)                                            | 0         |

<sup>a</sup>Reaction conditions: **2a** (0.2 mmol, 1.0 equiv.), **1a** (0.4 mmol). Isolated yield.

**Table S3. Optimization of reaction temperature<sup>a</sup>**
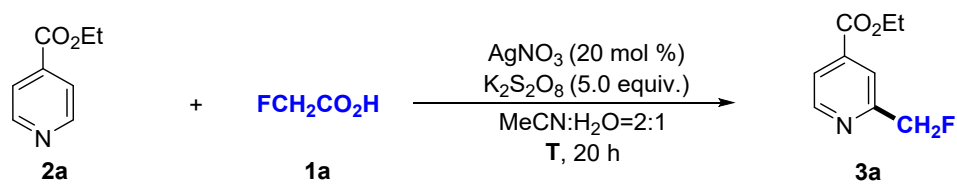

| Entry    | T (°C)    | Yield (%) |
|----------|-----------|-----------|
| 1        | 50        | 52        |
| 2        | 60        | 57        |
| 3        | 70        | 65        |
| <b>4</b> | <b>80</b> | <b>78</b> |
| 5        | 90        | 70        |
| 6        | 100       | 56        |

<sup>a</sup>Reaction conditions: **2a** (0.2 mmol, 1.0 equiv.), **1a** (0.4 mmol). Isolated yield.

**Table S4. Optimization of acid equivalent<sup>a</sup>**
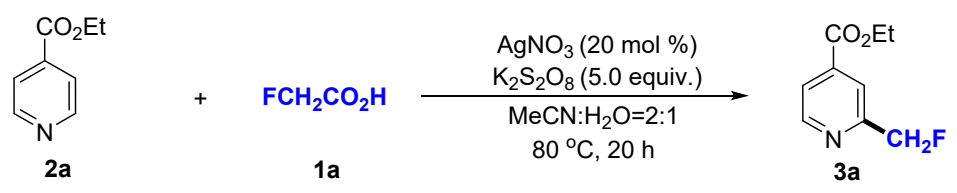

| Entry    | Acid Equivalent | Yield (%) |
|----------|-----------------|-----------|
| <b>1</b> | <b>2.0</b>      | <b>78</b> |
| 2        | 3.0             | 72        |

<sup>a</sup>Reaction conditions: **2a** (0.2 mmol, 1.0 equiv.). Isolated yield.

### 3. Substrate Scope of Monofluoroalkylation Reaction

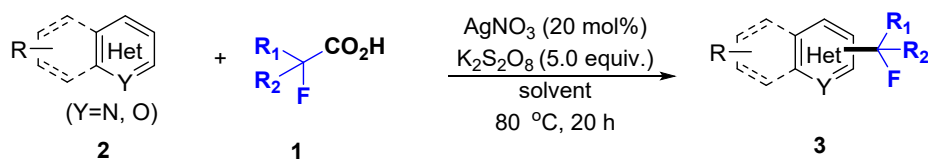

#### Typical experiment procedure:

To a 10 mL of Schlenk tube were added the heteroarene (0.2 mmol, 1.0 equiv.), AgNO<sub>3</sub> (20 mol%) and K<sub>2</sub>S<sub>2</sub>O<sub>8</sub> (5.0 equiv.). The mixture was evacuated and backfilled with N<sub>2</sub> for three times. Monofluoroalkyl carboxylic acids (1.5-3.0 equiv.), MeCN (1.0 mL) or DCE (1.0 mL) and water (0.5 mL) were then added. The Schlenk tube was screw capped and put into a preheated oil bath (80 °C). After stirring for 20 h, the reaction mixture was cooled to room temperature. Saturated solution of NaHCO<sub>3</sub> (3 mL) was added and the mixture was extracted with ethyl acetate (3×10 mL). The organic layer was washed with brine (10 mL), dried with anhydrous Na<sub>2</sub>SO<sub>4</sub> and concentrated. The residue was purified by silica gel flash column chromatography to give product 3.

#### Unsuccessful examples

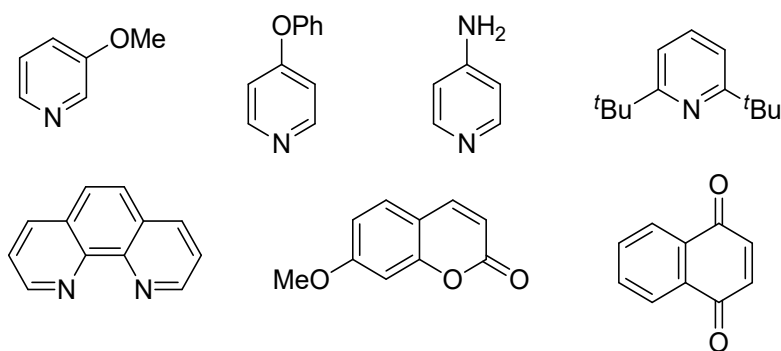

None or a trace of the desired products was detected when the above substrates proceeded the monofluoromethylation reactions.

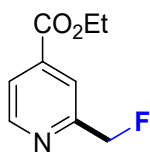

### Ethyl 2-(trifluoromethyl)isonicotinate (**3a**)

For 0.2 mmol scale, the standard procedure of method was followed to provide **3a** by column chromatography on silica gel (petroleum ether/EtOAc = 5:1, v/v) as a yellow oil (28 mg, 78%).  $^1\text{H}$  NMR (400 MHz,  $\text{CDCl}_3$ ):  $\delta$  8.71 (d,  $J = 4.8$  Hz, 1H), 8.00 (s, 1H), 7.79 (d,  $J = 4.8$  Hz, 1H), 5.53 (d,  $J = 46.8$  Hz, 2H), 4.41 (q,  $J = 7.2$  Hz, 2H), 1.40 (t,  $J = 7.4$  Hz, 3 H).  $^{19}\text{F}$  NMR (376 MHz,  $\text{CDCl}_3$ ):  $\delta$  -222.0 (t,  $J_{\text{F-H}} = 47.0$  Hz, 1F). GC-MS ( $m/z$ ): 183. **3a** is a known compound and has been reported in the previous paper.<sup>4</sup>

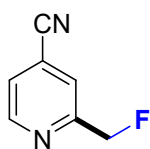

### 2-(Fluoromethyl)isonicotinonitrile (**3b**)

For 0.2 mmol scale, the standard procedure of method was followed to provide **3b** by column chromatography on silica gel (petroleum ether/EtOAc = 10:1 to 5:1, v/v) as a white solid (16 mg, 58%). M.p.: 49.8-51.4 °C.  $^1\text{H}$  NMR (400 MHz,  $\text{CDCl}_3$ ):  $\delta$  8.75 (d,  $J = 4.8$  Hz, 1H), 7.69 (s, 1H), 7.48 (d,  $J = 4.4$  Hz, 1H), 5.53 (d,  $J = 46.4$  Hz, 2H).  $^{19}\text{F}$  NMR (376 MHz,  $\text{CDCl}_3$ ):  $\delta$  -224.3 (t,  $J_{\text{F-H}} = 45.1$  Hz, 1F).  $^{13}\text{C}$  NMR (100 MHz,  $\text{CDCl}_3$ ):  $\delta$  158.4 (d,  $^2J_{\text{C-F}} = 23.0$  Hz), 150.1, 124.4, 121.7 (d,  $^3J_{\text{C-F}} = 4.0$  Hz), 121.3, 116.2, 83.3 (d,  $^1J_{\text{C-F}} = 171.0$  Hz). HRMS (ESI): calcd. For  $\text{C}_7\text{H}_6\text{FN}_2$  ( $\text{M}+\text{H}$ )<sup>+</sup>: 137.0515, found: 137.0520.

(Note: the low isolated yield of **3b** is due to its easily volatile.)

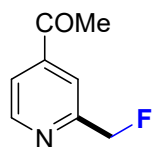

### 1-(2-(Fluoromethyl)pyridin-4-yl)ethan-1-one (**3c**)

For 0.2 mmol scale, the standard procedure of method was followed to provide **3c**



by column chromatography on silica gel (petroleum ether/EtOAc = 5:1, v/v) as a yellow oil (21 mg, 70%).  $^1\text{H}$  NMR (400 MHz,  $\text{CDCl}_3$ ):  $\delta$  8.76 (d,  $J = 4.4$  Hz, 1H), 7.89 (s, 1H), 7.69 (d,  $J = 4.4$  Hz, 1H), 5.57 (d,  $J = 46.8$  Hz, 2H), 2.65 (s, 3H).  $^{19}\text{F}$  NMR (376 MHz,  $\text{CDCl}_3$ ):  $\delta$  -222.4 (t,  $J_{\text{F-H}} = 47.0$  Hz, 1F).  $^{13}\text{C}$  NMR (100 MHz,  $\text{CDCl}_3$ ):  $\delta$  197.1, 158.0 (d,  $^2J_{\text{C-F}} = 22.0$  Hz), 150.4, 143.7, 120.5, 118.0 (d,  $^3J_{\text{C-F}} = 6.0$  Hz), 84.0 (d,  $^1J_{\text{C-F}} = 170.0$  Hz), 26.8. HRMS (ESI): calcd. For  $\text{C}_8\text{H}_9\text{FNO}$  ( $\text{M}+\text{H}$ ) $^+$ : 154.0668, found: 154.0671.

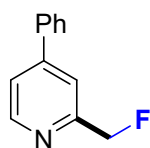

### 2-(Fluoromethyl)-4-phenylpyridine (3d)

For 0.2 mmol scale, the standard procedure of method was followed to provide **3d** by column chromatography on silica gel (petroleum ether/EtOAc = 10:1 to 5:1, v/v) as a yellow oil (25 mg, 68%).  $^1\text{H}$  NMR (400 MHz,  $\text{CDCl}_3$ ):  $\delta$  8.62 (d,  $J = 5.2$  Hz, 1H), 7.69-7.68 (m, 2H), 7.66 (s, 1H), 7.52-7.44 (m, 4H), 5.56 (d,  $J = 46.8$  Hz, 2H).  $^{19}\text{F}$  NMR (376 MHz,  $\text{CDCl}_3$ ):  $\delta$  -221.4 (t,  $J_{\text{F-H}} = 45.1$  Hz, 1F). GC-MS ( $m/z$ ): 187. **3d** is a known compound and has been reported in the previous paper.<sup>5</sup>

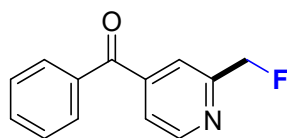

### Phenyl(2-(trifluoromethyl)pyridin-4-yl)methanone (3e)

For 0.2 mmol scale, the standard procedure of method was followed to provide **3e** by column chromatography on silica gel (petroleum ether/EtOAc = 10:1 to 5:1, v/v) as a yellow oil (27 mg, 62%).  $^1\text{H}$  NMR (400 MHz,  $\text{CDCl}_3$ ):  $\delta$  8.76 (d,  $J = 4.8$  Hz, 1H), 7.82 (d,  $J = 24.8$  Hz, 2H), 7.73 (s, 1H), 7.65 (t,  $J = 7.4$  Hz, 1H), 7.52 (m, 3H), 5.57 (d,  $J = 46.8$  Hz, 2H).  $^{19}\text{F}$  NMR (376 MHz,  $\text{CDCl}_3$ ):  $\delta$  -222.1 (t,  $J_{\text{F-H}} = 45.1$  Hz, 1F).  $^{13}\text{C}$  NMR (100 MHz,  $\text{CDCl}_3$ ):  $\delta$  194.9, 157.3 (d,  $^2J_{\text{C-F}} = 21.0$  Hz), 149.8 (d,  $J = 2.0$  Hz), 145.5, 135.7, 133.6, 130.1, 128.7, 122.2, 119.6 (d,  $^3J_{\text{C-F}} = 6.0$  Hz), 84.0 (d,  $^1J_{\text{C-F}} = 170.0$  Hz). HRMS (ESI): calcd. For  $\text{C}_{13}\text{H}_{11}\text{FNO}$  ( $\text{M}+\text{H}$ ) $^+$ : 216.0825, found: 216.0824.

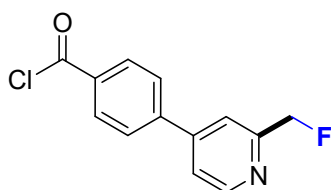

#### 4-(2-(Fluoromethyl)pyridin-4-yl)benzoyl chloride (**3f**)

For 0.2 mmol scale, the standard procedure of method was followed to provide **3f** by column chromatography on silica gel (petroleum ether/EtOAc = 5:1 to 2:1, v/v) as a white solid (27 mg, 54%). M.p.: 65.9-66.7 °C. <sup>1</sup>H NMR (400 MHz, CDCl<sub>3</sub>): δ 8.76 (d, *J* = 4.4 Hz, 1H), 7.77 (d, *J* = 8.0 Hz, 2H), 7.70 (s, 1H), 7.50-7.48 (m, 3H), 5.57 (d, *J* = 46.8 Hz, 2H). <sup>19</sup>F NMR (376 MHz, CDCl<sub>3</sub>): δ -222.4 (t, *J*<sub>F-H</sub> = 47.0 Hz, 1F). <sup>13</sup>C NMR (100 MHz, CDCl<sub>3</sub>): δ 193.7, 157.5 (d, <sup>2</sup>*J*<sub>C-F</sub> = 22.0 Hz), 149.9 (d, *J* = 2.0 Hz), 145.1, 140.3, 134.0, 131.5, 129.1, 122.0, 119.3 (d, <sup>3</sup>*J*<sub>C-F</sub> = 6.0 Hz), 84.0 (d, <sup>1</sup>*J*<sub>C-F</sub> = 170.0 Hz). HRMS (ESI): calcd. For C<sub>13</sub>H<sub>10</sub>ClFNO (M+H)<sup>+</sup>: 250.0435, found: 250.0435.

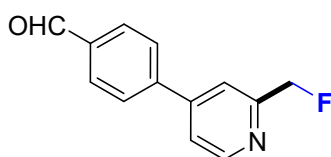

#### 4-(2-(Fluoromethyl)pyridin-4-yl)benzaldehyde (**3g**)

For 0.2 mmol scale, the standard procedure of method was followed to provide **3g** by column chromatography on silica gel (petroleum ether/EtOAc = 8:1 to 4:1, v/v) as a white solid (24 mg, 53%). M.p.: 72.8-74.6 °C. <sup>1</sup>H NMR (400 MHz, CDCl<sub>3</sub>): δ 10.10 (s, 1H), 8.69 (d, *J* = 4.8 Hz, 1H), 8.03 (d, *J* = 7.6 Hz, 2H), 7.84 (d, *J* = 8.0 Hz, 2H), 7.73 (s, 1H), 7.51 (d, *J* = 4.4 Hz, 1H), 5.59 (d, *J* = 46.4 Hz, 2H). <sup>19</sup>F NMR (376 MHz, CDCl<sub>3</sub>): δ -222.1 (t, *J*<sub>F-H</sub> = 47.0 Hz, 1F). <sup>13</sup>C NMR (100 MHz, CDCl<sub>3</sub>): δ 191.6, 157.4 (d, <sup>2</sup>*J*<sub>C-F</sub> = 27.0 Hz), 149.9, 148.0, 143.8, 136.6, 130.4, 127.8, 121.1, 118.3 (d, <sup>3</sup>*J*<sub>C-F</sub> = 6.0 Hz), 84.3 (d, <sup>1</sup>*J*<sub>C-F</sub> = 170.0 Hz). HRMS (ESI): calcd. For C<sub>13</sub>H<sub>11</sub>FNO (M+H)<sup>+</sup>: 216.0819, found: 216.0830.

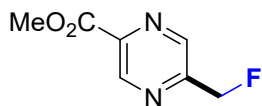

### Methyl 5-(fluoromethyl)pyrazine-2-carboxylate (**3h**)

For 0.2 mmol scale, the standard procedure of method was followed to provide **3h** by column chromatography on silica gel (petroleum ether/EtOAc = 5:1 to 2:1, v/v) as a yellow oil (17 mg, 50%). <sup>1</sup>H NMR (400 MHz, CDCl<sub>3</sub>): δ 9.28 (s, 1H), 8.89 (s, 1H), 5.65 (d, *J* = 46.4 Hz, 2H), 4.07 (s, 3H). <sup>19</sup>F NMR (376 MHz, CDCl<sub>3</sub>): δ -226.3 (t, *J*<sub>F-H</sub> = 47.0 Hz, 1F). GC-MS (*m/z*): 170. **3h** is a known compound and has been reported in the previous paper.<sup>6</sup>

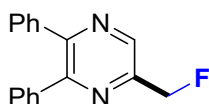

### 5-(Fluoromethyl)-2,3-diphenylpyrazine (**3i**)

For 0.2 mmol scale, the standard procedure of method was followed to provide **3i** by column chromatography on silica gel (petroleum ether/EtOAc = 10:1 to 5:1, v/v) as a yellow oil (22 mg, 42%). <sup>1</sup>H NMR (400 MHz, CDCl<sub>3</sub>): δ 8.70 (s, 1H), 7.38-7.36 (m, 3H), 7.28-7.21 (m, 7H), 5.58 (d, *J* = 46.8 Hz, 2H). <sup>19</sup>F NMR (376 MHz, CDCl<sub>3</sub>): δ -222.2 (t, *J*<sub>F-H</sub> = 47.0 Hz, 1F). <sup>13</sup>C NMR (100 MHz, CDCl<sub>3</sub>): δ 152.3, 151.7, 148.6 (d, <sup>2</sup>*J*<sub>C-F</sub> = 21.0 Hz), 139.9, 139.8, 138.2, 138.1, 129.6, 128.83, 128.76, 128.3 (d, <sup>3</sup>*J*<sub>C-F</sub> = 4.0 Hz), 83.0 (d, <sup>1</sup>*J*<sub>C-F</sub> = 169.0 Hz). HRMS (ESI): calcd. For C<sub>17</sub>H<sub>14</sub>FN<sub>2</sub> (M+H)<sup>+</sup>: 265.1141, found: 265.1143.

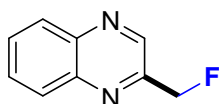

### 2-(Fluoromethyl)quinoxaline (**3j**)

For 0.2 mmol scale, the standard procedure of method was followed to provide **3j** by column chromatography on silica gel (petroleum ether/EtOAc = 10:1 to 5:1, v/v) as a white solid (20 mg, 61%). M.p.: 50.2-51.6 °C. <sup>1</sup>H NMR (400 MHz, CDCl<sub>3</sub>): δ 9.02 (s, 1H), 8.13-8.11 (m, 1H), 8.05-8.03 (m, 1H), 7.78-7.76 (m, 2H), 5.70 (d, *J* = 46.8 Hz, 2H). <sup>19</sup>F NMR (376 MHz, CDCl<sub>3</sub>): δ -223.0 (t, *J*<sub>F-H</sub> = 47.0 Hz, 1F). <sup>13</sup>C NMR (100

MHz, CDCl<sub>3</sub>):  $\delta$  150.9 (d,  $^2J_{C-F}$  = 21.0 Hz), 143.1 (d,  $^3J_{C-F}$  = 5.0 Hz), 142.3, 141.4, 130.5, 130.2, 129.4, 129.1, 83.6 (d,  $^1J_{C-F}$  = 169.0 Hz). HRMS (ESI): calcd. For C<sub>9</sub>H<sub>8</sub>FN<sub>2</sub> (M+H)<sup>+</sup>: 163.0672, found: 163.0679.

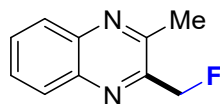

### 2-(Fluoromethyl)-3-methylquinoxaline (3k)

For 0.2 mmol scale, the standard procedure of method was followed to provide **3k** by column chromatography on silica gel (petroleum ether/EtOAc = 10:1 to 5:1, v/v) as a white solid (19 mg, 54%). M.p.: 75.0-76.4 °C. <sup>1</sup>H NMR (400 MHz, CDCl<sub>3</sub>):  $\delta$  8.08-8.02 (m, 2H), 7.78-7.70 (m, 2H), 5.70 (d,  $J$  = 47.2 Hz, 2H), 2.84 (s, 3H). <sup>19</sup>F NMR (376 MHz, CDCl<sub>3</sub>):  $\delta$  -217.5 (t,  $J_{F-H}$  = 47.0 Hz, 1F). GC-MS ( $m/z$ ): 176. **3k** is a known compound and has been reported in the previous paper.<sup>4</sup>

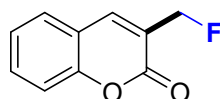

### 3-(Fluoromethyl)-2H-chromen-2-one (3l)

For 0.2 mmol scale, the standard procedure of method was followed to provide **3l** by column chromatography on silica gel (petroleum ether/EtOAc = 10:1 to 5:1, v/v) as a yellow oil (24 mg, 67%). <sup>1</sup>H NMR (400 MHz, CDCl<sub>3</sub>):  $\delta$  7.81 (s, 1H), 7.57-7.53 (m, 2H), 7.37-7.30 (m, 2H), 5.38 (d,  $J$  = 46.4 Hz, 2H). <sup>19</sup>F NMR (376 MHz, CDCl<sub>3</sub>):  $\delta$  -225.7 (t,  $J_{F-H}$  = 47.0 Hz, 1F). <sup>13</sup>C NMR (100 MHz, CDCl<sub>3</sub>):  $\delta$  159.5 (d,  $^3J_{C-F}$  = 6.0 Hz), 153.4, 138.9 (d,  $^3J_{C-F}$  = 10.0 Hz), 131.8, 128.0, 124.7, 124.3 (d,  $^2J_{C-F}$  = 19.0 Hz), 118.6, 116.7, 79.5 (d,  $^1J_{C-F}$  = 170.0 Hz). HRMS (ESI): calcd. For C<sub>10</sub>H<sub>8</sub>FO<sub>2</sub> (M+H)<sup>+</sup>: 179.0508, found: 179.0509.

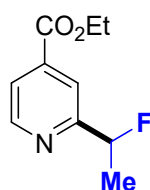

### Ethyl-2-(1-fluoroethyl)isonicotinate (3m)

For 0.2 mmol scale, the standard procedure of method was followed to provide **3m** by column chromatography on silica gel (petroleum ether/EtOAc = 5:1, v/v) as a yellow oil (31 mg, 80%). <sup>1</sup>H NMR (400 MHz, CDCl<sub>3</sub>): δ 8.69 (d, *J* = 4.8 Hz, 1H), 8.00 (s, 1H), 7.78 (d, *J* = 4.8 Hz, 1H), 5.72 (dq, *J* = 47.6 Hz, 6.0 Hz, 1H), 4.41 (q, *J* = 6.8 Hz, 2H), 1.69 (dd, *J* = 25.2 Hz, 6.4 Hz, 3H), 1.40 (t, *J* = 7.0 Hz, 3H). <sup>19</sup>F NMR (376 MHz, CDCl<sub>3</sub>): δ -178.0 (dq, *J*<sub>F-H</sub> = 48.9 Hz, 26.3 Hz, 1F). <sup>13</sup>C NMR (100 MHz, CDCl<sub>3</sub>): δ 165.0, 161.8 (d, <sup>2</sup>*J*<sub>C-F</sub> = 24.0 Hz), 149.7, 138.7, 122.1, 118.5 (d, <sup>3</sup>*J*<sub>C-F</sub> = 7.0 Hz), 91.1 (d, <sup>1</sup>*J*<sub>C-F</sub> = 170.0 Hz), 61.9, 21.6 (d, <sup>2</sup>*J*<sub>C-F</sub> = 23.0 Hz), 14.2. HRMS (ESI): calcd. For C<sub>10</sub>H<sub>13</sub>FNO<sub>2</sub> (M+H)<sup>+</sup>: 198.0930, found: 198.0939.

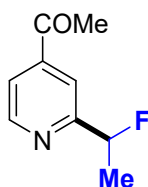

### 1-(2-(1-Ethyl)pyridin-4-yl)ethan-1-one hydrofluoride (**3n**)

For 0.2 mmol scale, the standard procedure of method was followed to provide **3n** by column chromatography on silica gel (petroleum ether/EtOAc = 10:1 to 5:1, v/v) as a yellow oil (24 mg, 72%). <sup>1</sup>H NMR (400 MHz, CDCl<sub>3</sub>): δ 8.75 (d, *J* = 4.4 Hz, 1H), 7.91 (s, 1H), 7.68 (d, *J* = 4.4 Hz, 1H), 5.76 (dq, *J* = 48.0 Hz, 6.4 Hz, 1H), 2.67 (s, 3H), 1.72 (dd, *J* = 24.4 Hz, 6.4 Hz, 3H). <sup>19</sup>F NMR (376 MHz, CDCl<sub>3</sub>): δ -178.3 (dq, *J*<sub>F-H</sub> = 48.9 Hz, 26.3 Hz, 1F). <sup>13</sup>C NMR (100 MHz, CDCl<sub>3</sub>): δ 197.1, 162.1 (d, <sup>2</sup>*J*<sub>C-F</sub> = 24.0 Hz), 150.0 (d, *J* = 2.0 Hz), 143.6, 120.2, 116.8 (d, <sup>3</sup>*J*<sub>C-F</sub> = 7.0 Hz), 91.0 (d, <sup>1</sup>*J*<sub>C-F</sub> = 170.0 Hz), 26.6, 21.5 (d, <sup>2</sup>*J*<sub>C-F</sub> = 23.0 Hz). HRMS (ESI): calcd. For C<sub>9</sub>H<sub>11</sub>FNO (M+H)<sup>+</sup>: 168.0829, found: 168.0825.

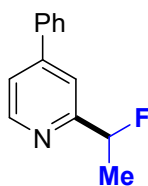

### 2-(1-Fluoroethyl)-4-phenylpyridine (**3o**)

For 0.2 mmol scale, the standard procedure of method was followed to provide **3o**

by column chromatography on silica gel (petroleum ether/EtOAc = 10:1 to 5:1, v/v) as a yellow oil (32 mg, 79%).  $^1\text{H}$  NMR (400 MHz,  $\text{CDCl}_3$ ):  $\delta$  8.60 (d,  $J = 5.2$  Hz, 1H), 7.70 (s, 1H), 7.67 (d,  $J = 7.6$  Hz, 2H), 7.51-7.43 (m, 4H), 5.75 (dq,  $J = 48.0$  Hz, 6.4 Hz, 1H), 1.74 (dd,  $J = 24.4$  Hz, 6.4 Hz, 3H).  $^{19}\text{F}$  NMR (376 MHz,  $\text{CDCl}_3$ ):  $\delta$  -177.5 (dq,  $J_{\text{F-H}} = 48.9$  Hz, 22.6 Hz, 1F).  $^{13}\text{C}$  NMR (100 MHz,  $\text{CDCl}_3$ ):  $\delta$  161.2 (d,  $^2J_{\text{C-F}} = 24.0$  Hz), 149.3 (d,  $J = 2.0$  Hz), 138.1, 129.12, 129.07, 127.0, 127.0, 117.0 (d,  $^3J_{\text{C-F}} = 7.0$  Hz), 91.4 (d,  $^1J_{\text{C-F}} = 168.0$  Hz), 21.7 (d,  $^2J_{\text{C-F}} = 23.0$  Hz). HRMS (ESI): calcd. For  $\text{C}_{13}\text{H}_{13}\text{FN}$  ( $\text{M}+\text{H}$ ) $^+$ : 202.1032, found: 202.1037.

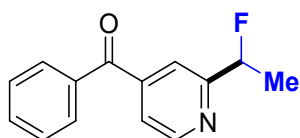

#### (2-(1-Fluoroethyl)pyridin-4-yl)(phenyl)methanone (3p)

For 0.2 mmol scale, the standard procedure of method was followed to provide **3p** by column chromatography on silica gel (petroleum ether/EtOAc = 10:1 to 5:1, v/v) as a yellow oil (29 mg, 64%).  $^1\text{H}$  NMR (400 MHz,  $\text{CDCl}_3$ ):  $\delta$  8.60 (d,  $J = 5.2$  Hz, 1H), 7.70 (s, 1H), 7.67 (d,  $J = 7.6$  Hz, 2H), 7.51-7.43 (m, 4H), 5.75 (dq,  $J = 48.4$  Hz, 6.4 Hz, 1H), 1.74 (dd,  $J = 24.4$  Hz, 6.4 Hz, 3H).  $^{19}\text{F}$  NMR (376 MHz,  $\text{CDCl}_3$ ):  $\delta$  -178.1 (dq,  $J_{\text{F-H}} = 48.9$  Hz, 26.3 Hz, 1F).  $^{13}\text{C}$  NMR (100 MHz,  $\text{CDCl}_3$ ):  $\delta$  195.1, 161.6 (d,  $^2J_{\text{C-F}} = 24.0$  Hz), 149.5 (d,  $J = 2.0$  Hz), 145.5, 135.7, 133.6, 130.1, 128.7, 122.0, 118.4 (d,  $^3J_{\text{C-F}} = 8.0$  Hz), 91.1 (d,  $^1J_{\text{C-F}} = 170.0$  Hz), 21.6 (d,  $^2J_{\text{C-F}} = 23.0$  Hz). HRMS (ESI): calcd. For  $\text{C}_{14}\text{H}_{13}\text{FNO}$  ( $\text{M}+\text{H}$ ) $^+$ : 230.0981, found: 230.0986.

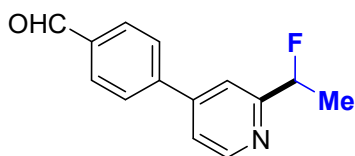

#### 4-(2-(1-Fluoroethyl)pyridin-4-yl)benzaldehyde (3q)

For 0.2 mmol scale, the standard procedure of method was followed to provide **3q** by column chromatography on silica gel (petroleum ether/EtOAc = 10:1 to 5:1, v/v) as an orange oil (25 mg, 55%).  $^1\text{H}$  NMR (400 MHz,  $\text{CDCl}_3$ ):  $\delta$  10.10 (s, 1H), 8.66 (d,  $J =$

4.8 Hz, 1H), 8.01 (d,  $J = 7.6$  Hz, 2H), 7.83 (d,  $J = 7.6$  Hz, 2H), 7.74 (s, 1H), 7.48 (d,  $J = 4.4$  Hz, 1H), 5.77 (dq,  $J = 48.9$  Hz, 6.4 Hz, 1H), 1.75 (dd,  $J = 24.4$  Hz, 6.4 Hz, 3H).  $^{19}\text{F}$  NMR (376 MHz,  $\text{CDCl}_3$ ):  $\delta$  -178.1 (dq,  $J_{\text{F-H}} = 48.0$  Hz, 22.6 Hz, 1F).  $^{13}\text{C}$  NMR (100 MHz,  $\text{CDCl}_3$ ):  $\delta$  191.6, 161.7 (d,  $^2J_{\text{C-F}} = 23.0$  Hz), 149.6 (d,  $J = 2.0$  Hz), 148.0, 143.9, 136.5, 130.4, 127.8, 120.8, 117.2 (d,  $^3J_{\text{C-F}} = 8.0$  Hz), 91.3 (d,  $^1J_{\text{C-F}} = 169.0$  Hz), 21.7 (d,  $^2J_{\text{C-F}} = 23.0$  Hz). HRMS (ESI): calcd. For  $\text{C}_{14}\text{H}_{13}\text{FNO}$  ( $\text{M}+\text{H}$ ) $^+$ : 230.0984, found: 230.0981.

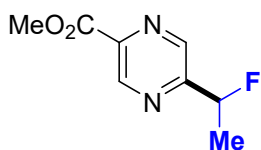

### Methyl-5-(1-fluoroethyl)pyrazine-2-carboxylate (**3r**)

For 0.2 mmol scale, the standard procedure of method was followed to provide **3r** by column chromatography on silica gel (petroleum ether/EtOAc = 5:1, v/v) as a yellow oil (28 mg, 75%).  $^1\text{H}$  NMR (400 MHz,  $\text{CDCl}_3$ ):  $\delta$  9.22 (s, 1H), 8.87 (s, 1H), 5.80 (dq,  $J = 47.6$  Hz, 6.4 Hz, 1H), 4.04 (s, 3H), 1.73 (dd,  $J = 24.4$  Hz, 6.4 Hz, 3H).  $^{19}\text{F}$  NMR (376 MHz,  $\text{CDCl}_3$ ):  $\delta$  -182.3 (dq,  $J_{\text{F-H}} = 48.9$  Hz, 26.3 Hz, 1F).  $^{13}\text{C}$  NMR (100 MHz,  $\text{CDCl}_3$ ):  $\delta$  164.2, 158.9 (d,  $^2J_{\text{C-F}} = 24.0$  Hz), 144.9 (d,  $J = 2.0$  Hz), 142.3, 140.9 (d,  $^3J_{\text{C-F}} = 8.0$  Hz), 89.9 (d,  $^1J_{\text{C-F}} = 170.0$  Hz), 53.2, 20.1 (d,  $^2J_{\text{C-F}} = 23.0$  Hz). HRMS (ESI): calcd. For  $\text{C}_8\text{H}_{10}\text{FN}_2\text{O}_2$  ( $\text{M}+\text{H}$ ) $^+$ : 185.0726, found: 185.0729.

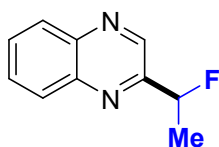

### 2-(Fluoroethyl)quinoxaline (**3s**)

For 0.2 mmol scale, the standard procedure of method was followed to provide **3s** by column chromatography on silica gel (petroleum ether/EtOAc = 10:1 to 5:1, v/v) as a yellow oil (25 mg, 70%).  $^1\text{H}$  NMR (400 MHz,  $\text{CDCl}_3$ ):  $\delta$  9.07 (s, 1H), 8.14-8.06 (m, 2H), 7.80-7.78 (m, 2H), 5.92 (dq,  $J = 48.0$  Hz, 6.8 Hz, 1H), 1.83 (dd,  $J = 24.4$  Hz, 6.4 Hz, 3H).  $^{19}\text{F}$  NMR (376 MHz,  $\text{CDCl}_3$ ):  $\delta$  -179.6 (dq,  $J_{\text{F-H}} = 48.9$  Hz, 26.3 Hz, 1F).  $^{13}\text{C}$

NMR (100 MHz, CDCl<sub>3</sub>):  $\delta$  154.9 (d,  $^2J_{C-F}$  = 24.0 Hz), 142.4 (d,  $^3J_{C-F}$  = 7.0 Hz), 142.2, 141.3 (d,  $J$  = 2.0 Hz), 130.4, 130.0, 129.3, 129.2, 90.8 (d,  $^1J_{C-F}$  = 168.0 Hz), 21.3 (d,  $^2J_{C-F}$  = 23.0 Hz). HRMS (ESI): calcd. For C<sub>10</sub>H<sub>10</sub>FN<sub>2</sub> (M+H)<sup>+</sup>: 177.0831, found: 177.0828.

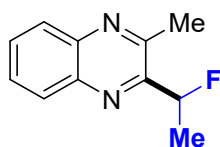

### 2-(1-Fluoroethyl)-3-methylquinoxaline (3t)

For 0.2 mmol scale, the standard procedure of method was followed to provide **3t** by column chromatography on silica gel (petroleum ether/EtOAc = 10:1 to 5:1, v/v) as a yellow oil (24 mg, 62%). <sup>1</sup>H NMR (400 MHz, CDCl<sub>3</sub>):  $\delta$  8.06 (d,  $J$  = 7.6 Hz, 1H), 8.00 (d,  $J$  = 8.0 Hz, 1H), 7.75-7.68 (m, 2H), 6.01 (dq,  $J$  = 47.6 Hz, 6.4 Hz, 1H), 2.85 (s, 3H), 1.86 (dd,  $J$  = 24.0 Hz, 6.4 Hz, 3H). <sup>19</sup>F NMR (376 MHz, CDCl<sub>3</sub>):  $\delta$  -173.8 (dq,  $J_{F-H}$  = 48.9 Hz, 24.1 Hz, 1F). <sup>13</sup>C NMR (100 MHz, CDCl<sub>3</sub>):  $\delta$  152.6, 152.1 (d,  $^2J_{C-F}$  = 19.0 Hz), 141.7 (d,  $J$  = 1.0 Hz), 140.2, 130.2, 129.2 (d,  $^3J_{C-F}$  = 5.0 Hz), 128.3, 89.6 (d,  $^1J_{C-F}$  = 167.0 Hz), 22.4 (d,  $J$  = 4.0 Hz), 18.9 (d,  $^2J_{C-F}$  = 23.0 Hz). HRMS (ESI): calcd. For C<sub>11</sub>H<sub>12</sub>FN<sub>2</sub> (M+H)<sup>+</sup>: 191.0988, found: 191.0985.

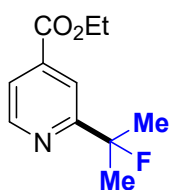

### Ethyl 2-(2-fluoropropan-2-yl)isonicotinate (3u)

For 0.2 mmol scale, the standard procedure of method was followed to provide **3u** by column chromatography on silica gel (petroleum ether/EtOAc = 5:1, v/v) as a yellow oil (35 mg, 83%). <sup>1</sup>H NMR (400 MHz, CDCl<sub>3</sub>):  $\delta$  8.70 (d,  $J$  = 4.8 Hz, 1H), 8.12 (s, 1H), 7.77 (d,  $J$  = 4.8 Hz, 1H), 4.44 (q,  $J$  = 7.2 Hz, 2H), 1.74 (d,  $J$  = 22.0 Hz, 6H), 1.43 (t,  $J$  = 7.0 Hz, 3H). <sup>19</sup>F NMR (376 MHz, CDCl<sub>3</sub>):  $\delta$  -144.1 (hept,  $J_{H-F}$  = 22.6 Hz, 1F). <sup>13</sup>C NMR (100 MHz, CDCl<sub>3</sub>):  $\delta$  165.1 (d,  $^2J_{C-F}$  = 27.0 Hz), 165.0, 149.3 (d,  $J$  = 2.0 Hz), 138.4 (d,  $J$  = 2.0 Hz), 121.4, 117.4 (d,  $^3J_{C-F}$  = 10.0 Hz), 96.6 (d,  $^1J_{C-F}$  = 169.0 Hz), 61.7,



27.7 (d,  $^2J_{\text{C-F}} = 24.0$  Hz), 14.1. HRMS (ESI): calcd. For  $\text{C}_{11}\text{H}_{15}\text{FNO}_2$  ( $\text{M}+\text{H}$ ) $^+$ : 212.1089, found: 212.1087.

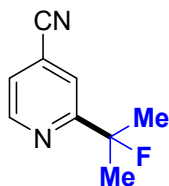

### 2-(2-Fluoropropan-2-yl)isonicotinonitrile (**3v**)

For 0.2 mmol scale, the standard procedure of method was followed to provide **3v** by column chromatography on silica gel (petroleum ether/EtOAc = 10:1 to 5:1, v/v) as a yellow oil (21 mg, 65%).  $^1\text{H}$  NMR (400 MHz,  $\text{CDCl}_3$ ):  $\delta$  8.71 (d,  $J = 4.4$  Hz, 1H), 7.79 (s, 1H), 7.42 (d,  $J = 4.8$  Hz, 1H), 1.70 (d,  $J = 22.0$  Hz, 6H).  $^{19}\text{F}$  NMR (376 MHz,  $\text{CDCl}_3$ ):  $\delta$  -145.0 (hept,  $J_{\text{H-F}} = 21.9$  Hz, 1F).  $^{13}\text{C}$  NMR (100 MHz,  $\text{CDCl}_3$ ):  $\delta$  165.8 (d,  $^2J_{\text{C-F}} = 28.0$  Hz), 149.6 (d,  $J = 2.0$  Hz), 123.7, 121.1 (d,  $J = 2.0$  Hz), 120.1 (d,  $^3J_{\text{C-F}} = 11.0$  Hz), 116.5, 96.6 (d,  $^1J_{\text{C-F}} = 171.0$  Hz), 27.6 (d,  $^2J_{\text{C-F}} = 23.0$  Hz). HRMS (ESI): calcd. For  $\text{C}_9\text{H}_{10}\text{FN}_2$  ( $\text{M}+\text{H}$ ) $^+$ : 165.0833, found: 165.0828.

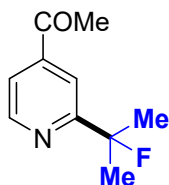

### 1-(2-(2-Fluoropropan-2-yl)pyridin-4-yl)ethan-1-one (**3w**)

For 0.2 mmol scale, the standard procedure of method was followed to provide **3w** by column chromatography on silica gel (petroleum ether/EtOAc = 10:1 to 5:1, v/v) as a yellow oil (26 mg, 73%).  $^1\text{H}$  NMR (400 MHz,  $\text{CDCl}_3$ ):  $\delta$  8.72 (d,  $J = 4.8$  Hz, 1H), 7.98 (s, 1H), 7.64 (d,  $J = 4.8$  Hz, 1H), 2.65 (s, 3H), 1.73 (d,  $J = 22.0$  Hz, 6H).  $^{19}\text{F}$  NMR (376 MHz,  $\text{CDCl}_3$ ):  $\delta$  -144.2 (hept,  $J_{\text{H-F}} = 21.9$  Hz, 1F).  $^{13}\text{C}$  NMR (100 MHz,  $\text{CDCl}_3$ ):  $\delta$  197.5, 165.7 (d,  $^2J_{\text{C-F}} = 27.0$  Hz), 149.8 (d,  $J = 2.0$  Hz), 143.7, 119.7, 116.5 (d,  $^3J_{\text{C-F}} = 11.0$  Hz), 96.9 (d,  $^1J_{\text{C-F}} = 169.0$  Hz), 27.9 (d,  $^2J_{\text{C-F}} = 24.0$  Hz), 26.8. HRMS (ESI): calcd. For  $\text{C}_{10}\text{H}_{13}\text{FNO}$  ( $\text{M}+\text{H}$ ) $^+$ : 182.0988, found: 182.0981.

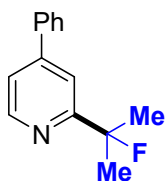

### 2-(2-Fluoropropan-2-yl)-4-phenylpyridine (**3x**)

For 0.2 mmol scale, the standard procedure of method was followed to provide **3x** by column chromatography on silica gel (petroleum ether/EtOAc = 10:1 to 5:1, v/v) as a yellow oil (35 mg, 81%).  $^1\text{H}$  NMR (400 MHz,  $\text{CDCl}_3$ ):  $\delta$  8.59 (d,  $J = 4.4$  Hz, 1H), 7.81 (s, 1H), 7.67 (d,  $J = 7.2$  Hz, 2H), 7.50-7.41 (m, 4H), 1.77 (d,  $J = 22.4$  Hz, 6H).  $^{19}\text{F}$  NMR (376 MHz,  $\text{CDCl}_3$ ):  $\delta$  -143.7 (hept,  $J_{\text{H-F}} = 21.9$  Hz, 1F).  $^{13}\text{C}$  NMR (100 MHz,  $\text{CDCl}_3$ ):  $\delta$  164.6 (d,  $^2J_{\text{C-F}} = 26.0$  Hz), 149.2, 149.1 (d,  $J = 2.0$  Hz), 138.3, 129.0 (d,  $J = 2.0$  Hz), 127.1, 120.2, 116.0 (d,  $^3J_{\text{C-F}} = 11.0$  Hz), 97.0 (d,  $^1J_{\text{C-F}} = 168.0$  Hz), 28.0 (d,  $^2J_{\text{C-F}} = 24.0$  Hz). HRMS (ESI): calcd. For  $\text{C}_{14}\text{H}_{15}\text{FN}$  ( $\text{M}+\text{H}$ ) $^+$ : 216.1193, found: 216.1189.

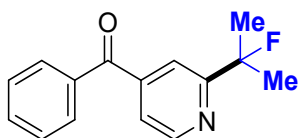

### (2-(2-Fluoropropan-2-yl)pyridin-4-yl)(phenyl)methanone (**3y**)

For 0.2 mmol scale, the standard procedure of method was followed to provide **3y** by column chromatography on silica gel (petroleum ether/EtOAc = 15:1 to 8:1, v/v) as a yellow oil (32 mg, 66%).  $^1\text{H}$  NMR (400 MHz,  $\text{CDCl}_3$ ):  $\delta$  8.60 (d,  $J = 4.8$  Hz, 1H), 7.72 (d,  $J = 5.6$  Hz, 2H), 7.69 (s, 1H), 7.51 (t,  $J = 7.4$  Hz, 1H), 7.40-7.35 (m, 3H), 1.63 (d,  $J = 22.4$  Hz, 6H).  $^{19}\text{F}$  NMR (376 MHz,  $\text{CDCl}_3$ ):  $\delta$  -144.0 (hept,  $J_{\text{H-F}} = 21.9$  Hz, 1F).  $^{13}\text{C}$  NMR (100 MHz,  $\text{CDCl}_3$ ):  $\delta$  195.1, 164.8 (d,  $^2J_{\text{C-F}} = 27.0$  Hz), 149.1 (d,  $J = 2.0$  Hz), 145.3 (d,  $J = 2.0$  Hz), 135.7, 133.4, 130.0, 128.5, 121.4, 117.3 (d,  $^3J_{\text{C-F}} = 10.0$  Hz), 96.7 (d,  $^1J_{\text{C-F}} = 169.0$  Hz), 27.7 (d,  $^2J_{\text{C-F}} = 24.0$  Hz). HRMS (ESI): calcd. For  $\text{C}_{15}\text{H}_{15}\text{FNO}$  ( $\text{M}+\text{H}$ ) $^+$ : 244.1136, found: 244.1138.

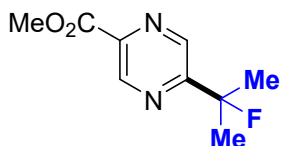

### Methyl 5-(2-fluoropropan-2-yl)pyrazine-2-carboxylate (**3z**)

For 0.2 mmol scale, the standard procedure of method was followed to provide **3z** by column chromatography on silica gel (petroleum ether/EtOAc = 10:1 to 5:1, v/v) as a white solid (33 mg, 83%). M.p.: 71.6-72.7 °C. <sup>1</sup>H NMR (400 MHz, CDCl<sub>3</sub>): δ 9.18 (s, 1H), 8.93 (s, 1H), 4.01 (s, 3H), 1.71 (d, *J* = 22.0 Hz, 6H). <sup>19</sup>F NMR (376 MHz, CDCl<sub>3</sub>): δ -147.5 (hept, *J*<sub>H-F</sub> = 21.9 Hz, 1F). <sup>13</sup>C NMR (100 MHz, CDCl<sub>3</sub>): δ 164.3, 162.2 (d, <sup>2</sup>*J*<sub>C-F</sub> = 27.0 Hz), 144.6 (d, *J* = 2.0 Hz), 141.8, 140.1 (d, <sup>3</sup>*J*<sub>C-F</sub> = 11.0 Hz), 96.2 (d, <sup>1</sup>*J*<sub>C-F</sub> = 169.0 Hz), 53.0, 27.5 (d, <sup>2</sup>*J*<sub>C-F</sub> = 24.0 Hz). HRMS (ESI): calcd. For C<sub>9</sub>H<sub>12</sub>FN<sub>2</sub>O<sub>2</sub> (M+H)<sup>+</sup>: 199.0884, found: 199.0883.

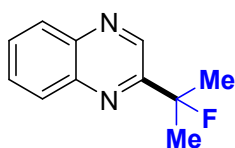

### 2-(2-Fluoropropan-2-yl)quinoxaline (**3aa**)

For 0.2 mmol scale, the standard procedure of method was followed to provide **3aa** by column chromatography on silica gel (petroleum ether/EtOAc = 15:1 to 8:1, v/v) as an orange oil (32 mg, 84%). <sup>1</sup>H NMR (400 MHz, CDCl<sub>3</sub>): δ 9.16 (s, 1H), 8.13-8.11 (m, 1H), 8.06-8.04 (m, 1H), 7.77-7.75 (m, 2H), 1.85 (d, *J* = 22.4 Hz, 6H). <sup>19</sup>F NMR (376 MHz, CDCl<sub>3</sub>): δ -145.2 (hept, *J*<sub>H-F</sub> = 21.9 Hz, 1F). <sup>13</sup>C NMR (100 MHz, CDCl<sub>3</sub>): δ 158.2 (d, <sup>2</sup>*J*<sub>C-F</sub> = 27.0 Hz), 141.86, 141.82, 141.76, 141.1 (d, *J* = 1.0 Hz), 130.1, 129.7, 129.2 (d, <sup>3</sup>*J*<sub>C-F</sub> = 5.0 Hz), 96.8 (d, <sup>1</sup>*J*<sub>C-F</sub> = 167.0 Hz), 27.7 (d, <sup>2</sup>*J*<sub>C-F</sub> = 23.0 Hz). HRMS (ESI): calcd. For C<sub>11</sub>H<sub>12</sub>FN<sub>2</sub> (M+H)<sup>+</sup>: 191.0989, found: 191.0985.

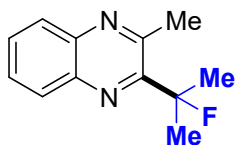

### 2-(2-Fluoropropan-2-yl)-3-methylquinoxaline (**3ab**)

For 0.2 mmol scale, the standard procedure of method was followed to provide **3ab**

by column chromatography on silica gel (petroleum ether/EtOAc = 10:1 to 5:1, v/v) as a semi solid (28 mg, 69%).  $^1\text{H}$  NMR (400 MHz,  $\text{CDCl}_3$ ):  $\delta$  7.99 (d,  $J = 8.4$  Hz, 2H), 7.73-7.66 (m, 2H), 2.93 (d,  $J = 5.6$  Hz, 3H), 1.88 (d,  $J = 22.0$  Hz, 6H).  $^{19}\text{F}$  NMR (376 MHz,  $\text{CDCl}_3$ ):  $\delta$  -142.4 (hq,  $J_{\text{H-F}} = 21.9$  Hz, 5.6 Hz, 1F).  $^{13}\text{C}$  NMR (100 MHz,  $\text{CDCl}_3$ ):  $\delta$  156.1 (d,  $^2J_{\text{C-F}} = 27.0$  Hz), 152.2 (d,  $J = 2.0$  Hz), 141.0, 139.5 (d,  $J = 3.0$  Hz), 129.8, 129.0 (d,  $^3J_{\text{C-F}} = 4.0$  Hz), 128.1, 98.0 (d,  $^1J_{\text{C-F}} = 165.0$  Hz), 27.3 (d,  $^2J_{\text{C-F}} = 24.0$  Hz), 24.7 (d,  $J = 11.0$  Hz). HRMS (ESI): calcd. For  $\text{C}_{12}\text{H}_{14}\text{FN}_2$  ( $\text{M}+\text{H}$ ) $^+$ : 205.1143, found: 205.1141.

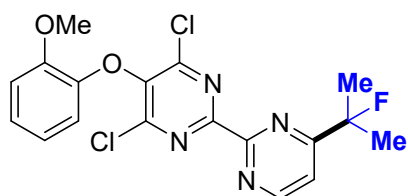

**4,6-Dichloro-4'-(2-fluoropropan-2-yl)-5-(2-methoxyphenoxy)-2,2'-bipyrimidine  
(3ac)**

For 0.2 mmol scale, the standard procedure of method was followed to provide **3ac** by column chromatography on silica gel (petroleum ether: EtOAc = 5:1 to 2:1, v/v) as a white solid (51 mg, 62%). M.p.: 117.6-119.8 °C.  $^1\text{H}$  NMR (400 MHz,  $\text{CDCl}_3$ ):  $\delta$  9.00 (d,  $J = 4.8$  Hz, 1H), 7.68 (d,  $J = 4.8$  Hz, 1H), 7.11 (t,  $J = 7.6$  Hz, 1H), 7.00 (d,  $J = 8.8$  Hz, 1H), 6.88 (t,  $J = 7.8$  Hz, 1H), 6.72 (d,  $J = 8.0$  Hz, 1H), 3.87 (s, 3H), 1.79 (d,  $J = 22.0$  Hz, 6H).  $^{19}\text{F}$  NMR (376 MHz,  $\text{CDCl}_3$ ):  $\delta$  -146.2 (hept,  $J_{\text{H-F}} = 21.9$  Hz, 1F).  $^{13}\text{C}$  NMR (100 MHz,  $\text{CDCl}_3$ ):  $\delta$  173.8 (d,  $^2J_{\text{C-F}} = 29.0$  Hz), 159.9 (d,  $J = 3.0$  Hz), 158.7 (d,  $J = 2.0$  Hz), 157.1, 155.4, 149.1, 144.6, 124.8, 120.9, 116.3, 115.9 (d,  $^3J_{\text{C-F}} = 10.0$  Hz), 112.9, 96.3 (d,  $^1J_{\text{C-F}} = 170.0$  Hz), 56.2, 27.3 (d,  $^2J_{\text{C-F}} = 23.0$  Hz). HRMS (ESI): calcd. For  $\text{C}_{18}\text{H}_{16}\text{Cl}_2\text{FN}_4\text{O}_2$ : 409.0639, found: 409.0634.

#### 4. Substrate Scope of Bis-monofluoroalkylation Reaction

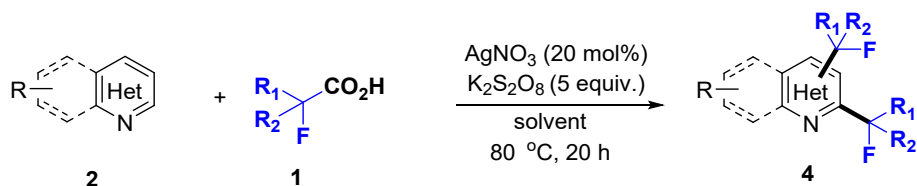

##### Typical experiment procedure:

To a 10 mL of Schlenk tube were added the heteroarene (0.2 mmol, 1.0 equiv.), AgNO<sub>3</sub> (20 mol%) and K<sub>2</sub>S<sub>2</sub>O<sub>8</sub> (5.0 equiv.). The mixture was evacuated and backfilled with N<sub>2</sub> for three times. Monofluoroalkyl carboxylic acids (2.0-5.0 equiv.), CH<sub>3</sub>CN (1.0 mL) or DCE (1.0 mL) and water (0.5 mL) were then added. The Schlenk tube was screw capped and put into a preheated oil bath (80 °C). After stirring for 20 h, the reaction mixture was cooled to room temperature. Saturated solution of NaHCO<sub>3</sub> (3 mL) was added and the mixture was extracted with ethyl acetate (3×10 mL). The organic layer was washed with brine (10 mL), dried with anhydrous Na<sub>2</sub>SO<sub>4</sub> and concentrated. The residue was purified with silica gel chromatography (petroleum ether) to give product **4**.

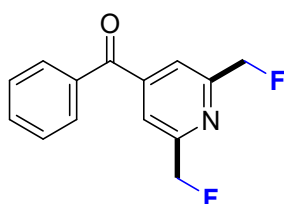

##### (2,6-Bis(trifluoromethyl)pyridin-4-yl)0(phenyl)methanone (**4a**)

For 0.2 mmol scale, the standard procedure of method was followed to provide **4a** by column chromatography on silica gel (petroleum ether/EtOAc = 10:1 to 5:1, v/v) as a yellow oil (33 mg, 68%). <sup>1</sup>H NMR (400 MHz, CDCl<sub>3</sub>): δ 7.83 (d, *J* = 7.6 Hz, 2H), 7.69-7.65 (m, 3H), 7.53 (t, *J* = 7.4 Hz, 2H), 5.55 (d, *J* = 46.4 Hz, 4H). <sup>19</sup>F NMR (376 MHz, CDCl<sub>3</sub>): δ -222.2 (t, *J*<sub>F-H</sub> = 47.0 Hz, 2F). <sup>13</sup>C NMR (100 MHz, CDCl<sub>3</sub>): δ 194.8, 157.0 (dd, *J*<sub>C-F</sub> = 22.0 Hz, 2.0 Hz), 146.6, 135.6, 133.8, 130.1, 128.8, 119.0 (d, *J*<sub>C-F</sub> = 6.0 Hz), 83.8 (d, *J*<sub>C-F</sub> = 170.0 Hz). HRMS (ESI): calcd. For C<sub>14</sub>H<sub>12</sub>F<sub>2</sub>NO (M+H)<sup>+</sup>: 248.0887, found: 248.0887.

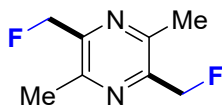

#### 2,5-Bis(fluoromethyl)-3,6-dimethylpyrazine (4b)

For 0.2 mmol scale, the standard procedure of method was followed to provide **4b** by column chromatography on silica gel (petroleum ether/EtOAc = 10:1 to 5:1, v/v) as a yellow oil (28 mg, 80%). <sup>1</sup>H NMR (400 MHz, CDCl<sub>3</sub>): δ 5.52 (d, *J* = 48.4 Hz, 4H), 2.63 (s, 6H). <sup>19</sup>F NMR (376 MHz, CDCl<sub>3</sub>): δ -216.4 (t, *J*<sub>F-H</sub> = 47.0 Hz, 2F). <sup>13</sup>C NMR (100 MHz, CDCl<sub>3</sub>): δ 150.0, 147.8 (d, *J*<sub>C-F</sub> = 20.0 Hz), 83.5 (d, *J*<sub>C-F</sub> = 167.0 Hz), 20.4. HRMS (ESI): calcd. For C<sub>8</sub>H<sub>11</sub>F<sub>2</sub>N<sub>2</sub> (M+H)<sup>+</sup>: 173.0893, found: 173.0890.

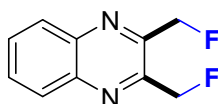

#### 2,3-Bis(fluoromethyl)quinoxaline (4c)

For 0.2 mmol scale, the standard procedure of method was followed to provide **4c** by column chromatography on silica gel (petroleum ether/EtOAc = 10:1 to 5:1, v/v) as a yellow oil (26 mg, 67%). <sup>1</sup>H NMR (400 MHz, CDCl<sub>3</sub>): δ 8.14 (m, 2H), 7.84 (m, 2H), 5.82 (d, *J* = 46.8 Hz, 4H). <sup>19</sup>F NMR (376 MHz, CDCl<sub>3</sub>): δ -218.6 (t, *J*<sub>F-H</sub> = 47.0 Hz, 2F). <sup>13</sup>C NMR (100 MHz, CDCl<sub>3</sub>): δ 149.2 (d, *J*<sub>C-F</sub> = 19.0 Hz), 141.3, 131.0, 129.3, 83.6 (d, *J*<sub>C-F</sub> = 168.0 Hz). HRMS (ESI): calcd. For C<sub>10</sub>H<sub>9</sub>F<sub>2</sub>N<sub>2</sub> (M+H)<sup>+</sup>: 195.0739, found: 195.0734.

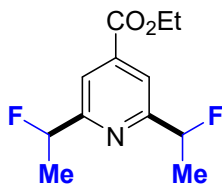

#### Ethyl 2,6-bis(1-fluoroethyl)isonicotinate (4d)

For 0.2 mmol scale, the standard procedure of method was followed to provide **4d** by column chromatography on silica gel (petroleum ether/EtOAc = 5:1, v/v) as a yellow oil (40 mg, 85%). <sup>1</sup>H NMR (400 MHz, CDCl<sub>3</sub>): δ 7.95 (s, 2H), 5.69 (dq, *J* = 48.0 Hz, 6.4 Hz, 2H), 4.42 (q, *J* = 7.2 Hz, 2H), 1.67 (dd, *J* = 24.4 Hz, 6.4 Hz, 6H), 1.42 (t, *J* =

7.0 Hz, 3H).  $^{19}\text{F}$  NMR (376 MHz,  $\text{CDCl}_3$ ):  $\delta$  -177.9 (dq,  $J_{\text{F-H}} = 45.1$  Hz, 22.6 Hz, 1F), -178.1 (dq,  $J_{\text{F-H}} = 48.9$  Hz, 24.4 Hz, 1F).  $^{13}\text{C}$  NMR (100 MHz,  $\text{CDCl}_3$ ):  $\delta$  164.9, 161.2 (dt,  $J_{\text{C-F}} = 24.0$  Hz, 2.0 Hz), 139.6, 117.7 (t,  $J_{\text{C-F}} = 6.5$  Hz), 91.0 (dd,  $J_{\text{C-F}} = 169.0$  Hz, 6.0 Hz), 61.9, 21.5 (dd,  $J_{\text{C-F}} = 23.0$  Hz, 7.0 Hz), 14.2. HRMS (ESI): calcd. For  $\text{C}_{12}\text{H}_{16}\text{F}_2\text{NO}_2$  ( $\text{M}+\text{H}$ ) $^+$ : 244.1152, found: 244.1149.

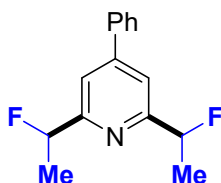

#### 2,6-Bis(1-fluoroethyl)-4-phenylpyridine (4e)

For 0.2 mmol scale, the standard procedure of method was followed to provide **4e** by column chromatography on silica gel (petroleum ether/EtOAc = 10:1 to 5:1, v/v) as a yellow oil (37 mg, 76%).  $^1\text{H}$  NMR (400 MHz,  $\text{CDCl}_3$ ):  $\delta$  7.70 (d,  $J = 6.8$  Hz, 2H), 7.63 (s, 2H), 7.52-7.44 (m, 3H), 5.71 (dq, 48.0 Hz, 6.1 Hz, 2H), 1.72 (dd,  $J = 24.8$  Hz, 6.4 Hz, 6H).  $^{19}\text{F}$  NMR (376 MHz,  $\text{CDCl}_3$ ):  $\delta$  -177.3 (dq,  $J_{\text{F-H}} = 45.1$  Hz, 24.1 Hz, 1F), -177.8 (dq,  $J_{\text{F-H}} = 48.9$  Hz, 24.1 Hz, 1F).  $^{13}\text{C}$  NMR (100 MHz,  $\text{CDCl}_3$ ):  $\delta$  160.6 (d,  $J_{\text{C-F}} = 23.0$  Hz), 150.3, 138.2, 129.2, 129.1, 127.1, 116.1 (dd,  $J_{\text{C-F}} = 11.0$  Hz, 7.0 Hz), 91.5 (dd,  $J_{\text{C-F}} = 168.5$  Hz, 7.5 Hz), 21.8 (dd,  $J_{\text{C-F}} = 22.5$  Hz, 7.5 Hz). HRMS (ESI): calcd. For  $\text{C}_{15}\text{H}_{16}\text{F}_2\text{N}$  ( $\text{M}+\text{H}$ ) $^+$ : 248.1256, found: 248.1251.

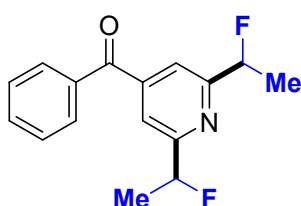

#### (2,6-Bis(1-fluoroethyl)pyridin-4-yl)(phenyl)methanone (4f)

For 0.2 mmol scale, the standard procedure of method was followed to provide **4f** by column chromatography on silica gel (petroleum ether/EtOAc = 10:1 to 5:1, v/v) as a yellow oil (38 mg, 70%).  $^1\text{H}$  NMR (400 MHz,  $\text{CDCl}_3$ ):  $\delta$  7.73 (d,  $J = 7.6$  Hz, 2H), 7.58 (s, 2H), 7.54 (t,  $J = 7.4$  Hz, 1H), 7.42 (t,  $J = 8.6$  Hz, 2H), 5.63 (dq,  $J = 48.0$  Hz, 6.4 Hz, 2H), 1.61 (dd,  $J = 24.4$  Hz, 6.4 Hz, 6H).  $^{19}\text{F}$  NMR (376 MHz,  $\text{CDCl}_3$ ):  $\delta$  -177.9

(dq,  $J_{F-H} = 48.9$  Hz, 24.8 Hz, 1F), -178.2 (dq,  $J_{F-H} = 45.1$  Hz, 24.1 Hz, 1F).  $^{13}\text{C}$  NMR (100 MHz,  $\text{CDCl}_3$ ):  $\delta$  194.9 (d,  $J = 7.0$  Hz), 160.9 (d,  $J_{C-F} = 25.0$  Hz), 146.5, 135.7, 133.5, 130.0, 128.6, 117.5 (dd,  $J_{C-F} = 10.0$  Hz, 7.0 Hz), 91.0 (dd,  $J_{C-F} = 169.0$  Hz, 3.5 Hz), 21.4 (dd,  $J_{C-F} = 23.0$  Hz, 5.0 Hz). HRMS (ESI): calcd. For  $\text{C}_{16}\text{H}_{16}\text{F}_2\text{NO}$  ( $\text{M}+\text{H}$ ) $^+$ : 276.1207, found: 276.1200.

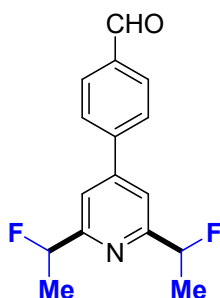

#### 4-(2,6-Bis(1-fluoroethyl)pyridin-4-yl)benzaldehyde (4g)

For 0.2 mmol scale, the standard procedure of method was followed to provide **4g** by column chromatography on silica gel (petroleum ether/EtOAc = 10:1 to 5:1, v/v) as a colorless oil (36 mg, 65%).  $^1\text{H}$  NMR (400 MHz,  $\text{CDCl}_3$ ):  $\delta$  10.10 (s, 1H), 8.01 (d,  $J = 7.6$  Hz, 2H), 7.85 (d,  $J = 7.6$  Hz, 2H), 7.65 (s, 2H), 5.73 (dq,  $J = 48.0$  Hz, 5.6 Hz, 2H), 1.72 (dd,  $J = 24.8$  Hz, 6.4 Hz, 6H).  $^{19}\text{F}$  NMR (376 MHz,  $\text{CDCl}_3$ ):  $\delta$  -177.9 (dq,  $J_{F-H} = 48.9$  Hz, 24.1 Hz, 1F), -178.4 (dq,  $J_{F-H} = 48.9$  Hz, 24.1 Hz, 1F).  $^{13}\text{C}$  NMR (100 MHz,  $\text{CDCl}_3$ ):  $\delta$  191.7, 161.0 (d,  $J_{C-F} = 23.0$  Hz), 148.9, 144.0, 136.5, 130.4, 127.9, 116.2 (dd,  $J_{C-F} = 9.5$  Hz, 7.5 Hz), 91.3 (dd,  $J_{C-F} = 169.0$  Hz, 7.0 Hz), 21.7 (dd,  $J_{C-F} = 23.5$  Hz, 7.5 Hz). HRMS (ESI): calcd. For  $\text{C}_{16}\text{H}_{16}\text{F}_2\text{NO}$  ( $\text{M}+\text{H}$ ) $^+$ : 276.1201, found: 276.1200.

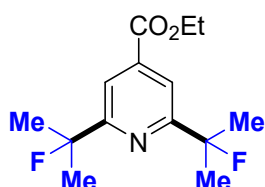

#### Ethyl 2,6-bis(2-fluoropropan-2-yl)isonicotinate (4h)

For 0.2 mmol scale, the standard procedure of method was followed to provide **4h** by column chromatography on silica gel (petroleum ether/EtOAc = 5:1, v/v) as a yellow



oil (48 mg, 89%).  $^1\text{H}$  NMR (400 MHz,  $\text{CDCl}_3$ ):  $\delta$  8.00 (s, 2H), 4.42 (q,  $J = 7.2$  Hz, 2H), 1.69 (d,  $J = 22.0$  Hz, 12H), 1.41 (t,  $J = 7.2$  Hz, 3H).  $^{19}\text{F}$  NMR (376 MHz,  $\text{CDCl}_3$ ):  $\delta$  -144.5 (hept,  $J_{\text{H-F}} = 21.9$  Hz, 2F).  $^{13}\text{C}$  NMR (100 MHz,  $\text{CDCl}_3$ ):  $\delta$  165.3, 164.1 (dd,  $J_{\text{C-F}} = 28.0$  Hz, 2.0 Hz), 139.4, 116.1 (d,  $J_{\text{C-F}} = 10.0$  Hz), 96.8 (d,  $J_{\text{C-F}} = 169.0$  Hz), 61.8, 27.7 (d,  $J_{\text{C-F}} = 24.0$  Hz), 14.2. HRMS (ESI): calcd. For  $\text{C}_{14}\text{H}_{20}\text{F}_2\text{NO}_2$  ( $\text{M}+\text{H}$ ) $^+$ : 272.1465, found: 272.1462.

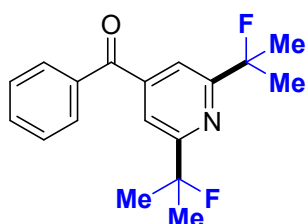

**(2,6-Bis(1-fluoroethyl)pyridin-4-yl)(phenyl)methanone (4i)**

For 0.2 mmol scale, the standard procedure of method was followed to provide **4i** by column chromatography on silica gel (petroleum ether/EtOAc = 10:1 to 5:1, v/v) as a yellow oil (46 mg, 76%).  $^1\text{H}$  NMR (400 MHz,  $\text{CDCl}_3$ ):  $\delta$  7.84 (d,  $J = 7.2$  Hz, 2H), 7.31 (s, 2H), 7.64 (t,  $J = 7.4$  Hz, 1H), 7.51 (t,  $J = 7.6$  Hz, 2H), 1.73 (d,  $J = 22.4$  Hz, 12H).  $^{19}\text{F}$  NMR (376 MHz,  $\text{CDCl}_3$ ):  $\delta$  -144.5 (hept,  $J_{\text{H-F}} = 21.9$  Hz, 2F).  $^{13}\text{C}$  NMR (100 MHz,  $\text{CDCl}_3$ ):  $\delta$  195.5, 163.8 (dd,  $J_{\text{C-F}} = 27.0$  Hz, 2.0 Hz), 146.4, 135.9, 133.5, 130.1, 128.6, 115.9 (d,  $J_{\text{C-F}} = 10.0$  Hz), 96.9 (d,  $J_{\text{C-F}} = 169.0$  Hz), 27.8 (d,  $J_{\text{C-F}} = 24.0$  Hz). HRMS (ESI): calcd. For  $\text{C}_{18}\text{H}_{20}\text{F}_2\text{NO}$  ( $\text{M}+\text{H}$ ) $^+$ : 304.1518, found: 304.1513.

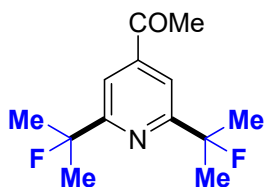

**1-(2,6-Bis(1-fluoroethyl)pyridin-4-yl)ethan-1-one (4j-C6)**

For 0.2 mmol scale, the standard procedure of method was followed to provide **4j-C6** by column chromatography on silica gel (petroleum ether/EtOAc = 10:1 to 5:1, v/v) as a yellow oil (33 mg, 69%).  $^1\text{H}$  NMR (400 MHz,  $\text{CDCl}_3$ ):  $\delta$  7.88 (s, 1H), 2.65 (s, 1H), 1.70 (d,  $J = 22.0$  Hz, 12H).  $^{19}\text{F}$  NMR (376 MHz,  $\text{CDCl}_3$ ):  $\delta$  -144.6 (hept,  $J_{\text{H-F}} = 22.6$

Hz, 2F).  $^{13}\text{C}$  NMR (100 MHz,  $\text{CDCl}_3$ ):  $\delta$  197.7, 164.6 (dd,  $J_{\text{C-F}} = 27.0$  Hz, 2.0 Hz), 144.7, 114.4 (d,  $J_{\text{C-F}} = 10.0$  Hz), 96.9 (d,  $J_{\text{C-F}} = 169.0$  Hz), 27.8 (d,  $J_{\text{C-F}} = 24.0$  Hz), 26.9. HRMS (ESI): calcd. For  $\text{C}_{13}\text{H}_{18}\text{F}_2\text{NO}$  ( $\text{M}+\text{H}$ ) $^+$ : 242.1356, found: 242.1356.

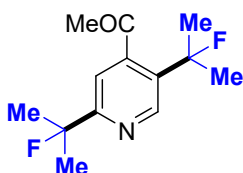

#### 1-(2,5-Bis(1-fluoroethyl)pyridin-4-yl)ethan-1-one (4j-C5)

For 0.2 mmol scale, the standard procedure of method was followed to provide **4j-C5** by column chromatography on silica gel (petroleum ether/EtOAc = 10:1 to 5:1, v/v) as a yellow oil (10 mg, 21%).  $^1\text{H}$  NMR (400 MHz,  $\text{CDCl}_3$ ):  $\delta$  8.44 (s, 1H), 7.33 (s, 1H), 2.53 (s, 3H), 1.74 (t,  $J = 47.2$  Hz, 12H).  $^{19}\text{F}$  NMR (376 MHz,  $\text{CDCl}_3$ ):  $\delta$  -130.3 (hept,  $J_{\text{H-F}} = 22.6$  Hz, 1F), -144.3 (hept,  $J_{\text{H-F}} = 21.9$  Hz, 1F).  $^{13}\text{C}$  NMR (100 MHz,  $\text{CDCl}_3$ ):  $\delta$  203.9, 163.6 (d,  $J_{\text{C-F}} = 26.0$  Hz), 147.8 (dd,  $J_{\text{C-F}} = 2.0$  Hz, 4.0 Hz), 145.8 (dd,  $J_{\text{C-F}} = 7.0$  Hz, 2.0 Hz), 134.9 (d,  $J_{\text{C-F}} = 22.0$  Hz), 113.7 (d,  $J_{\text{C-F}} = 10.0$  Hz), 96.8 (d,  $J_{\text{C-F}} = 169.0$  Hz), 96.0 (d,  $J_{\text{C-F}} = 168.0$  Hz), 31.2 (d,  $J = 6.2$  Hz), 29.4 (d,  $J_{\text{C-F}} = 25.0$  Hz), 27.7 (d,  $J_{\text{C-F}} = 24.0$  Hz). HRMS (ESI): calcd. For  $\text{C}_{13}\text{H}_{18}\text{F}_2\text{NO}$  ( $\text{M}+\text{H}$ ) $^+$ : 242.1361, found: 242.1356.

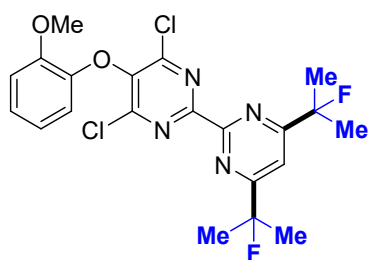

#### 4,6-Dichloro-4',6'-bis(2-fluoropropan-2-yl)-5-(2-methoxyphenoxy)-2,2'-bipyrimidine (4k)

For 0.2 mmol scale, the standard procedure of method was followed to provide **4k** by column chromatography on silica gel (petroleum ether: EtOAc = 10:1 to 5:1, v/v) as a white solid (52 mg, 56%). M.p.: 101.3-103.2 °C.  $^1\text{H}$  NMR (400 MHz,  $\text{CDCl}_3$ ):  $\delta$  7.92 (s, 1H), 7.12 (t,  $J = 7.6$  Hz, 1H), 7.02 (d,  $J = 8.0$  Hz, 1H), 6.88 (t,  $J = 7.6$  Hz, 1H), 6.71

(d,  $J = 8.0$  Hz, 1H), 3.91 (s, 3H), 1.79 (d,  $J = 22.4$  Hz, 12H).  $^{19}\text{F}$  NMR (376 MHz,  $\text{CDCl}_3$ ):  $\delta$  -146.0 (hept,  $J_{\text{H-F}} = 22.6$  Hz, 2F).  $^{13}\text{C}$  NMR (100 MHz,  $\text{CDCl}_3$ ):  $\delta$  174.4 (dd,  $J_{\text{C-F}} = 28.0$  Hz, 2.0 Hz), 159.9 (t,  $J = 2.5$  Hz), 157.8, 155.4, 149.2, 144.7, 144.3, 124.8, 120.8, 116.0, 113.0, 110.0 (t,  $J_{\text{C-F}} = 10.0$  Hz), 96.4 (d,  $J_{\text{C-F}} = 171.0$  Hz), 56.2, 27.4 (d,  $J_{\text{C-F}} = 23.0$  Hz). HRMS (ESI): calcd. For  $\text{C}_{21}\text{H}_{21}\text{Cl}_2\text{F}_2\text{N}_4\text{O}_2$ : 469.1016, found: 469.1010.

## 5. Control Experiments and Competition Experiments

### 5.1 Control Experiments of Bis-fluoroalkylation

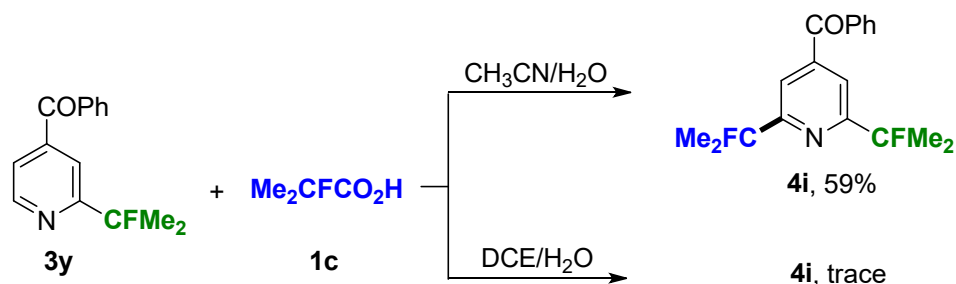

**Procedure:** To a 10 mL of Schlenk tube were added AgNO<sub>3</sub> (7.0 mg, 20 mol%) and K<sub>2</sub>S<sub>2</sub>O<sub>8</sub> (270.3 mg, 5.0 equiv.). The mixture was evacuated and backfilled with N<sub>2</sub> for three times, 3y (48.6 mg, 0.2 mmol, 1.0 equiv.), 1c (106 mg, 5.0 equiv.), solvent (1.0 mL) and H<sub>2</sub>O (0.5 ml) were then added. The Schlenk tube was screw capped and put into a preheated oil bath (80 °C). After stirring for 20 h, the reaction mixture was cooled to room temperature. Using a mixture of MeCN and H<sub>2</sub>O (2:1) as a solvent, the reaction afforded the product 4i in 59% yield, while the yield of product 4i was trace using a mixture of DCE and H<sub>2</sub>O (2:1) as a solvent

### 5.2 Competition Experiments

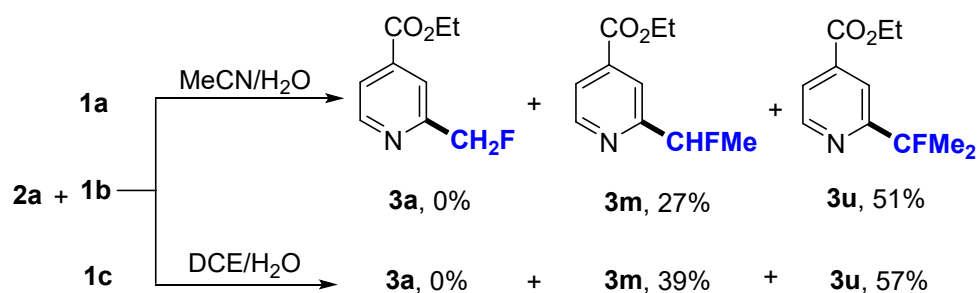

**Procedure:** To a 10 mL of Schlenk tube were added AgNO<sub>3</sub> (7.0 mg, 20 mol%) and K<sub>2</sub>S<sub>2</sub>O<sub>8</sub> (270.3 mg, 5.0 equiv.). The mixture was evacuated and backfilled with N<sub>2</sub> for three times. 2a (30.2 mg, 0.2 mmol, 1.0 equiv.), 1a (31.2 mg, 2.0 equiv.), 1b (39.2 mg, 2.0 equiv.), 1c (42.4 mg, 2.0 equiv.), MeCN or DCE (1.0 mL) and H<sub>2</sub>O (0.5 ml) were then added. The Schlenk tube was screw capped and put into a preheated oil bath (80 °C). After stirring for 20 h, the reaction mixture was cooled to room temperature.

The product yields were determined by  $^{19}\text{F}$  NMR spectroscopy using  $\text{PhCF}_3$  as an internal standard.

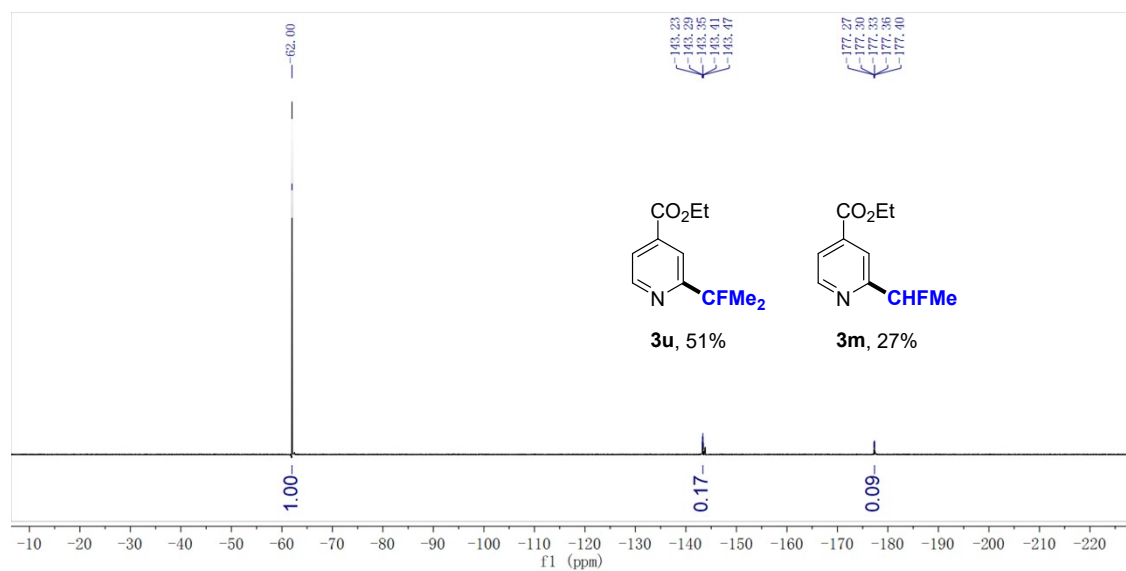

**Figure S1.**  $^{19}\text{F}$  NMR analysis of competition experiment of **1** and **2a** using  $\text{MeCN}/\text{H}_2\text{O}$  as solvent

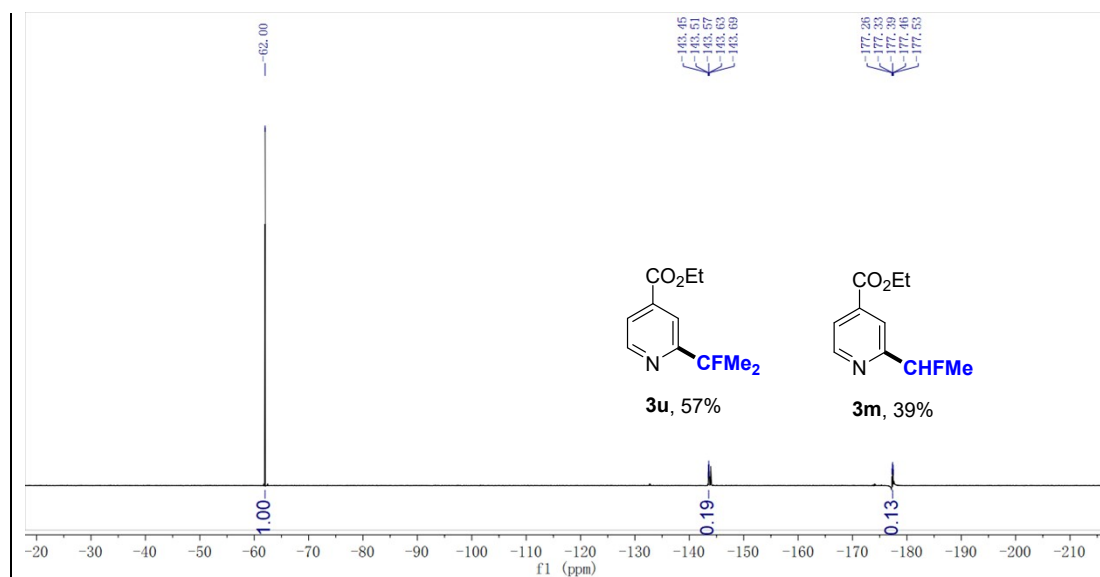

**Figure S2.**  $^{19}\text{F}$  NMR analysis of competition experiment of **1** and **2a** using  $\text{DCE}/\text{H}_2\text{O}$  as solvent

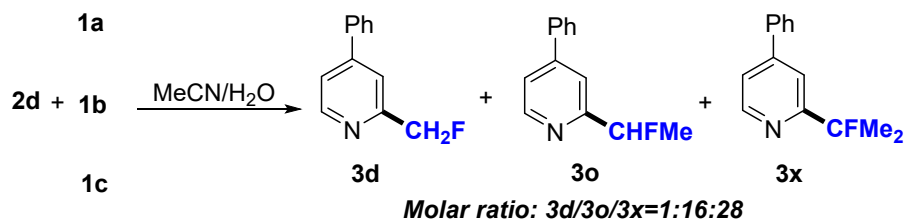

**Procedure:** To a 10 mL of Schlenk tube were added **2d** (31.0 mg, 0.2 mmol, 1.0 equiv.), AgNO<sub>3</sub> (7.0 mg, 20 mol%) and K<sub>2</sub>S<sub>2</sub>O<sub>8</sub> (270.3 mg, 5.0 equiv.). The mixture was evacuated and backfilled with N<sub>2</sub> for three times. **1a** (15.6 mg, 1.0 equiv.), **1b** (19.6 mg, 1.0 equiv.), **1c** (21.2 mg, 1.0 equiv.), MeCN (1.0 mL) and H<sub>2</sub>O (0.5 ml) were then added. The Schlenk tube was screw capped and put into a preheated oil bath (80 °C). After stirring for 20 h, the reaction mixture was cooled to room temperature. The molar ratio of corresponding products was determined by <sup>19</sup>F NMR using PhCF<sub>3</sub> as internal standard.

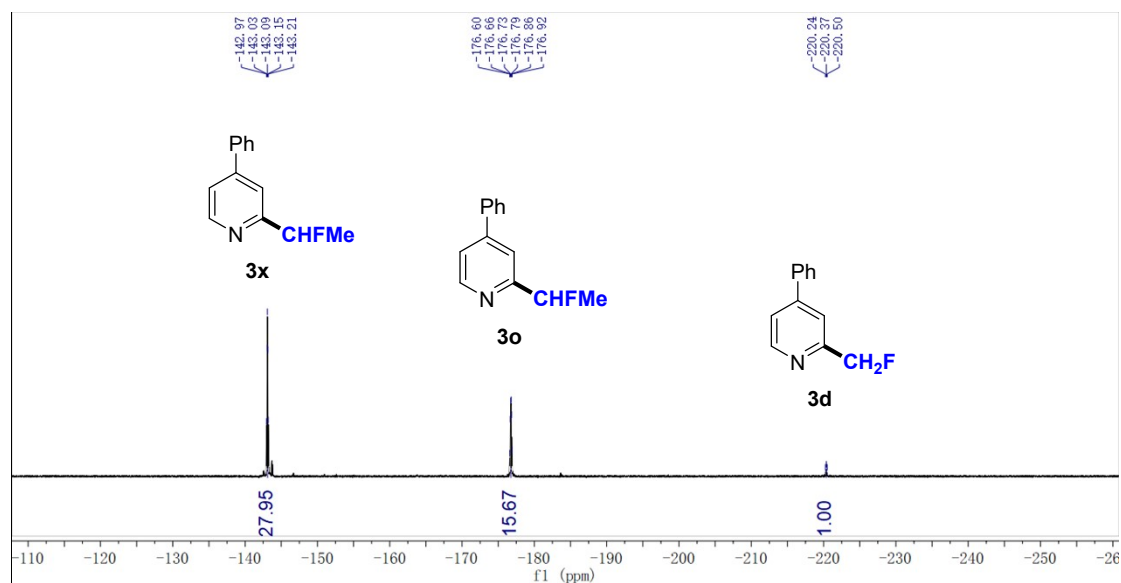

**Figure S3.** <sup>19</sup>F NMR analysis of competition experiment of **1** and **2d** using MeCN/H<sub>2</sub>O as solvent

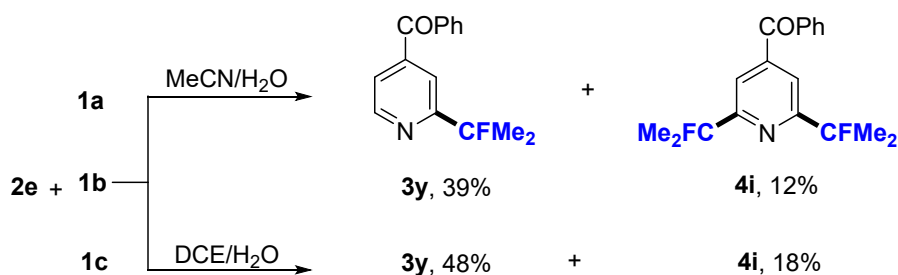

**Procedure:** To a 10 mL of Schlenk tube were added **2e** (37.0 mg, 0.2 mmol, 1.0 equiv.), AgNO<sub>3</sub> (7.0 mg, 20 mol%) and K<sub>2</sub>S<sub>2</sub>O<sub>8</sub> (270.3 mg, 5.0 equiv.). The mixture was evacuated and backfilled with N<sub>2</sub> for three times. **1a** (78.0 mg, 5.0 equiv.), **1b** (98.1 mg, 5.0 equiv.), **1c** (106.1 mg, 5.0 equiv.), MeCN or DCE (1.0 mL) and H<sub>2</sub>O (0.5 ml) were then added. The Schlenk tube was screw capped and put into a preheated oil bath (80 °C). After stirring for 20 h, the reaction mixture was cooled to room temperature. The product yields were determined by <sup>19</sup>F NMR spectroscopy using PhCF<sub>3</sub> as an internal standard.

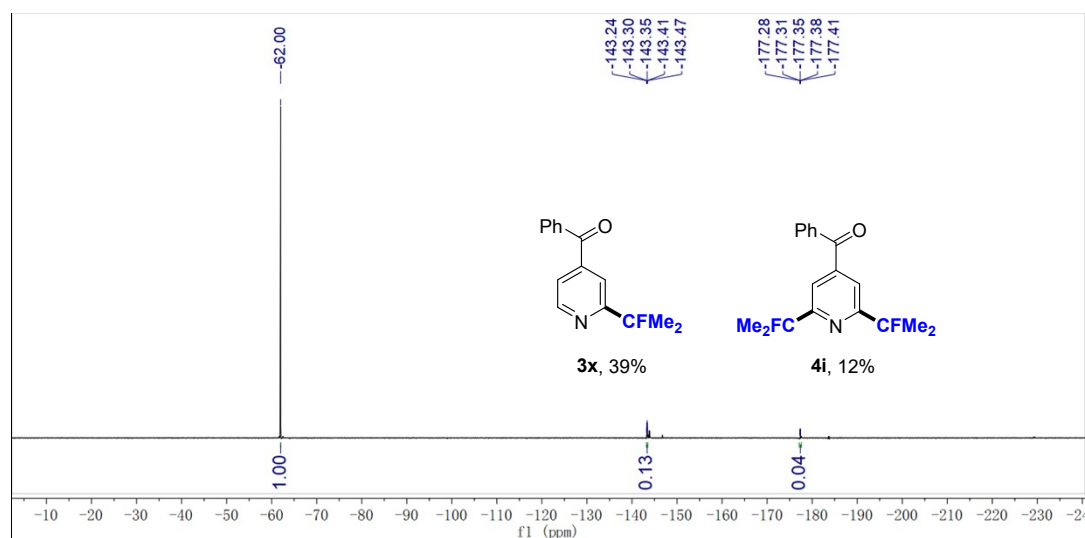

**Figure S4.** <sup>19</sup>F NMR analysis of competition experiment of **1** and **2e** using MeCN/H<sub>2</sub>O as solvent

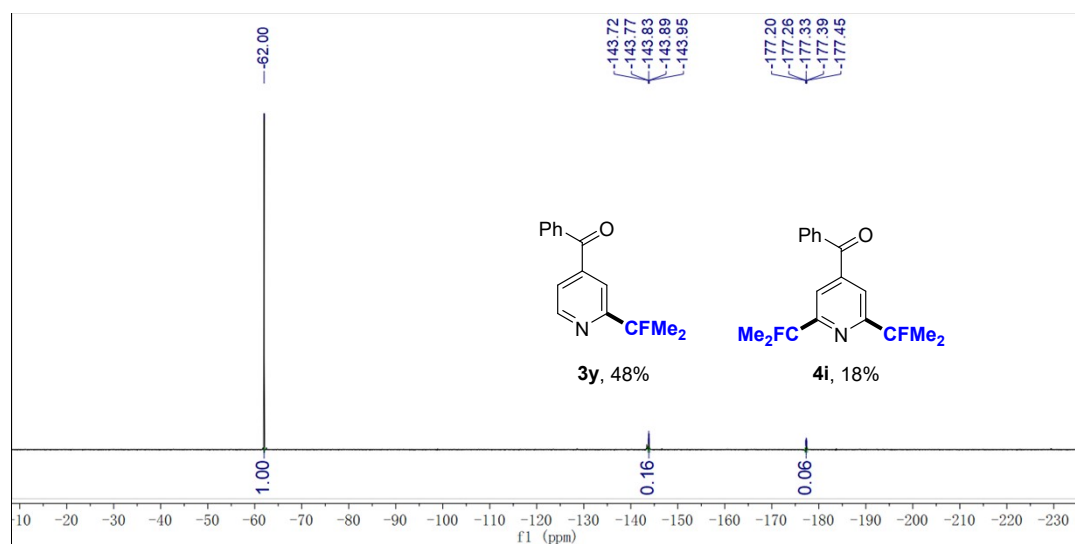

**Figure S5.**  $^{19}\text{F}$  NMR analysis of competition experiment of **1** and **2e** using DCE/ $\text{H}_2\text{O}$  as solvent



## 6. Radical Inhibition Experiments and Plausible Reaction

### Mechanism

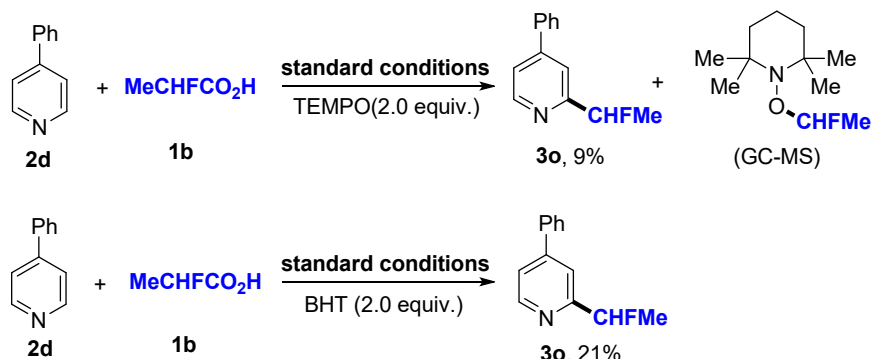

**Procedure:** To a 10 mL of Schlenk tube were added 4-pyridylpyridine **2d** (31.0 mg, 0.2 mmol, 1.0 equiv.), AgNO<sub>3</sub> (7.0 mg, 20 mol %), K<sub>2</sub>S<sub>2</sub>O<sub>8</sub> (270.3 mg, 5.0 equiv.) and TEMPO (62.5 mg, 2.0 equiv.) or BHT (88.1 mg, 2.0 equiv.). The mixture was evacuated and backfilled with N<sub>2</sub> for three times. 2-Difluoropropionic acid (39.0 mg, 2.0 equiv.), MeCN (1.0 mL) and H<sub>2</sub>O (0.5 ml) were then added. The Schlenk tube was screw capped and put into a preheated oil bath (80 °C). After stirring for 20 h, the reaction mixture was cooled to room temperature. The yield was determined by <sup>19</sup>F NMR spectroscopy using PhCF<sub>3</sub> as an internal standard. The adduct of TEMPO and monofluoroethyl radical detected by GC-MS was in agreement with the reported in the literature.<sup>7</sup>

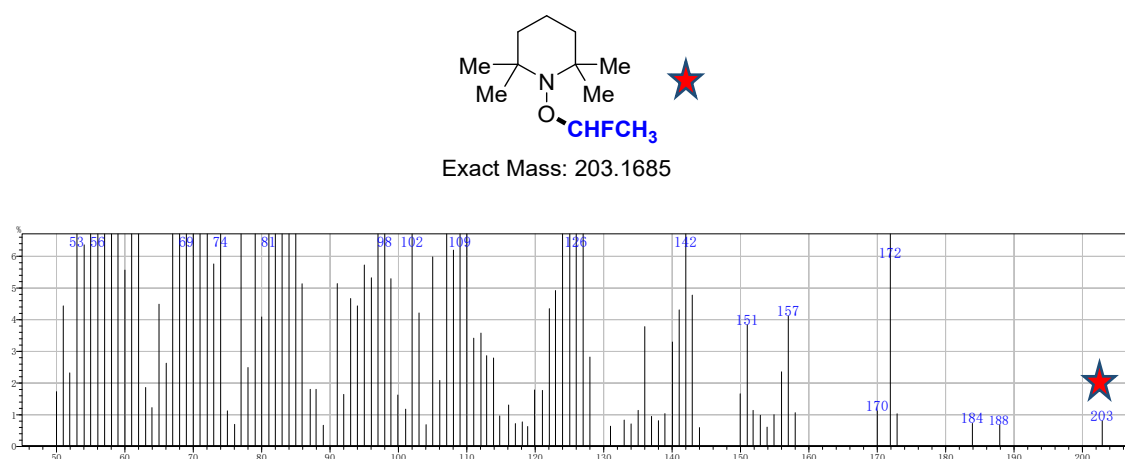

Figure S6. GC-MS analysis of adding TEMPO to standard reaction conditions

Based on these results, the reaction mechanism was proposed as shown in Figure S7. Initially, the oxidative decarboxylation of  $\alpha$ -fluorocarboxylic acids afforded monofluoroalkyl radical in the presence of silver catalyst and  $K_2S_2O_8$ . Subsequently, monofluoroalkyl radical reacts the protonated heteroaromatic ring (I) to generate a cyclohexadienyl-type radical cation (II). After that, the intermediate (II) is oxidated and deprotonated to give the cationic intermediate (III), followed by deprotonation to give the monofluoroalkylated product.

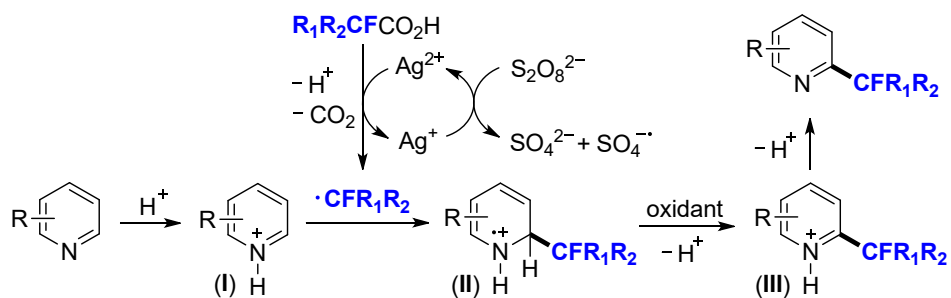

**Figure S7.** Plausible reaction mechanism.

## 7. References

1. Straub, M. R.; Birman, V. B. Organocatalytic Enantioselective Synthesis of  $\alpha$ -Fluoro- $\beta$ -aminoacid Derivatives, *Org. Lett.* **2019**, *21*, 3, 849-849.
2. Keller, M.; Maschauer, S.; Brennauer, A.; Tripal, P.; Koglin, N.; Dittrich, R.; Bernhardt, G.; Kuwert, T.; Wester, H.-J.; Buschauer, A.; Prante, O. Prototypic  $^{18}\text{F}$ -labeled Argininamide-type Neuropeptide Y  $\text{Y}_1\text{R}$  Antagonists as Tracers for PET Imaging of Mammary Carcinoma, *ACS Med. Chem. Lett.* **2017**, *8*, 304-309.
3. Velayutham, D.; Jayaraman, K.; Kulangiappar, K.; Ilayaraja, N.; Ram Babu, Y.; Narayana Reddy, S.; Victor Babu, K.; Noel, M. Free Radical and Isomerisation Processes during the Electrochemical Fluorination of *n*-Butyryl Chloride, *i*-Butyryl Chloride and Pivaloyl Chloride in Anhydrous Hydrogen Fluoride. *J. Fluorine Chem.* **2006**, *127*, 8, 1111–1118.
4. Fujiwara, Y.; Dixon, J.; O'Hara, F.; Daa Funder, E.; Dixon, D. D.; Rodriguez, R. A.; Baxter, R. D.; Herlé, B.; Sach, N.; Collins, M. R.; Ishihara, Y.; Baran, P. S. Practical and Innate Carbon–Hydrogen Functionalization of Heterocycles. *Nature*, **2012**, *492*, 95-99.
5. Hu, C.-C.; Hu, W.-Q.; Xu, X.-H.; Qing, F.-L. 2-Position-selective C–H Fluoromethylation of Six-membered Heteroaryl *N*-oxides with (Fluoromethyl)triphenylphosphonium Iodide. *J. Fluorine Chem.* **2021**, *242*, 109695.
6. Hall, Adrian; Farthing, Christopher Neil; Castro Pineiro, Jose, Luis. Fused Aminodihydrothiazine Derivatives Useful as Bace Inhibitors [P]. EP, WO**2012**, 098213.
7. Taniguchi, R.; Noto, N.; Tanaka, S.; Takahashi, K.; Sarkar, S. K.; Oyama, R.; Abe, M.; Koike, T.; Akita, M. Simple Generation of Various  $\alpha$ -Monofluoroalkyl Radicals by Organic Photoredox Catalysis: Modular Synthesis of  $\beta$ -Monofluoroketones. *Chem. Commun.* **2021**, *57*, 2609-2612.

## 8. $^1\text{H}$ , $^{19}\text{F}$ and $^{13}\text{C}$ NMR Spectra of Isolated Products

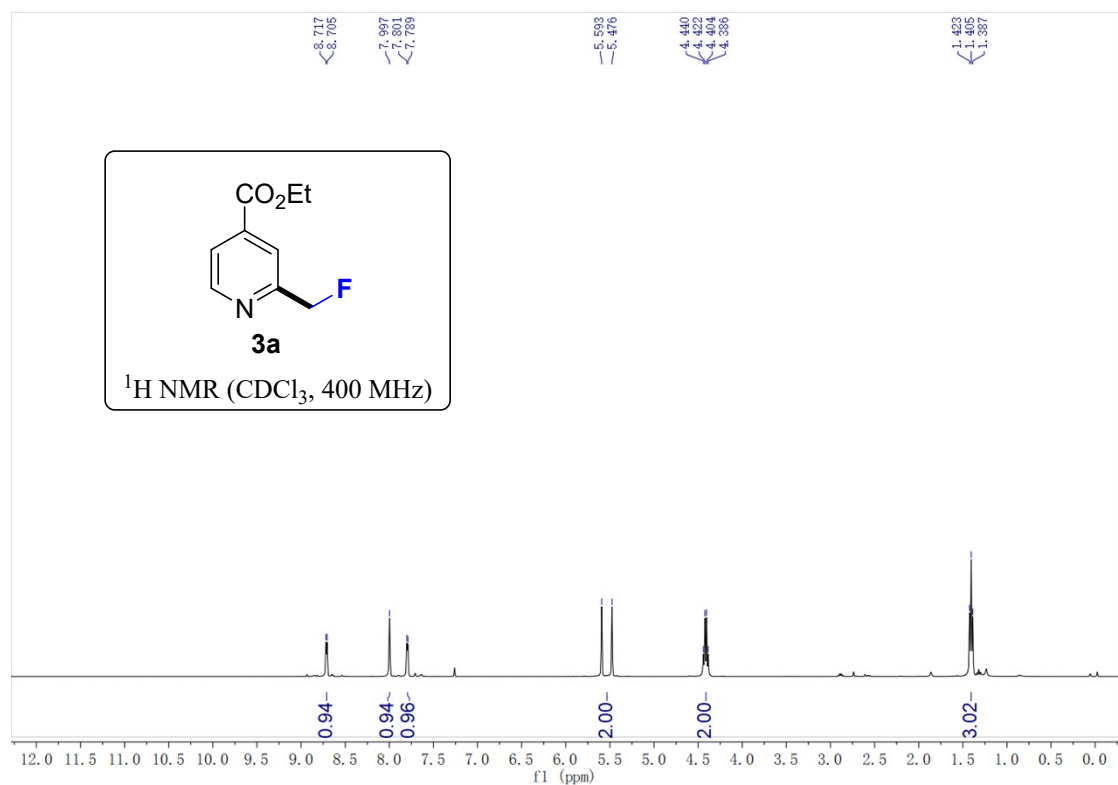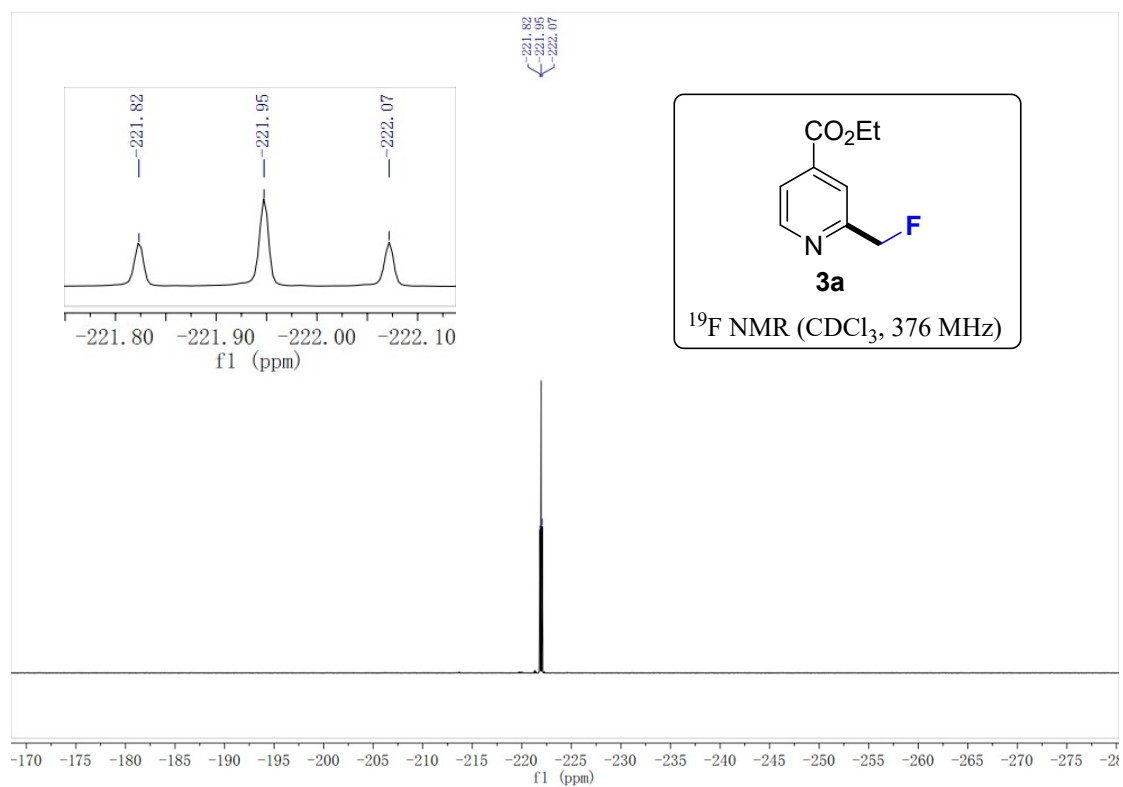

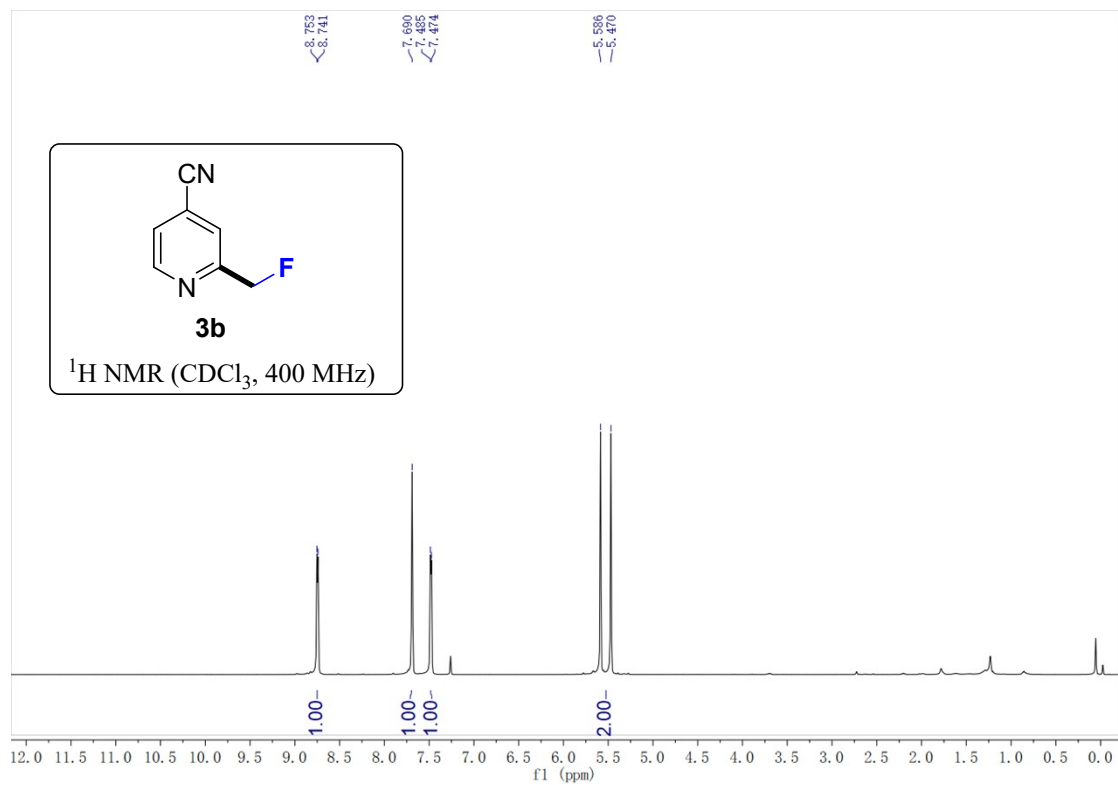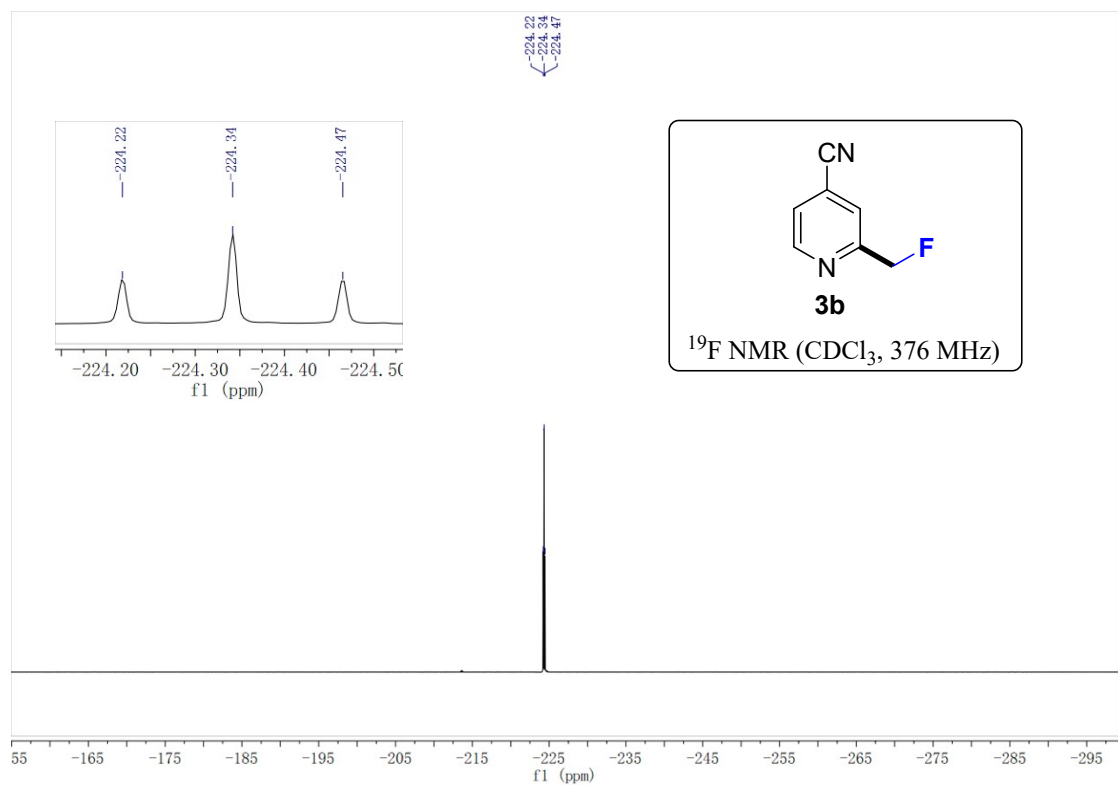

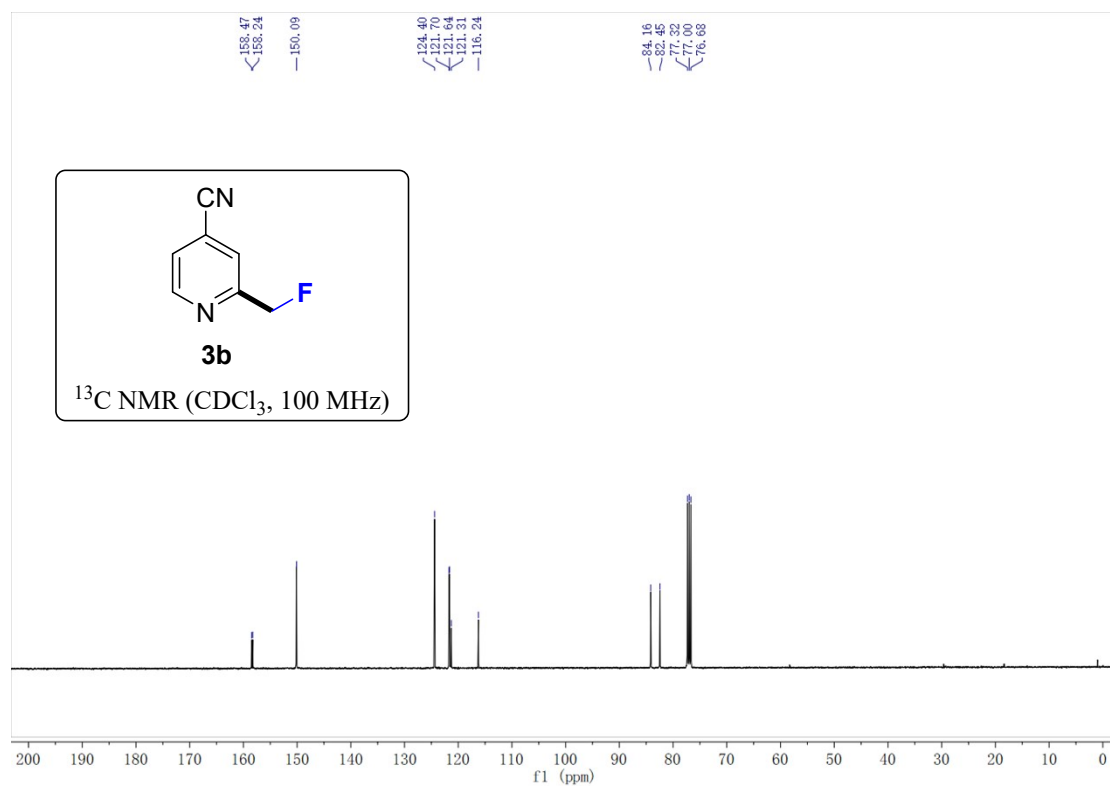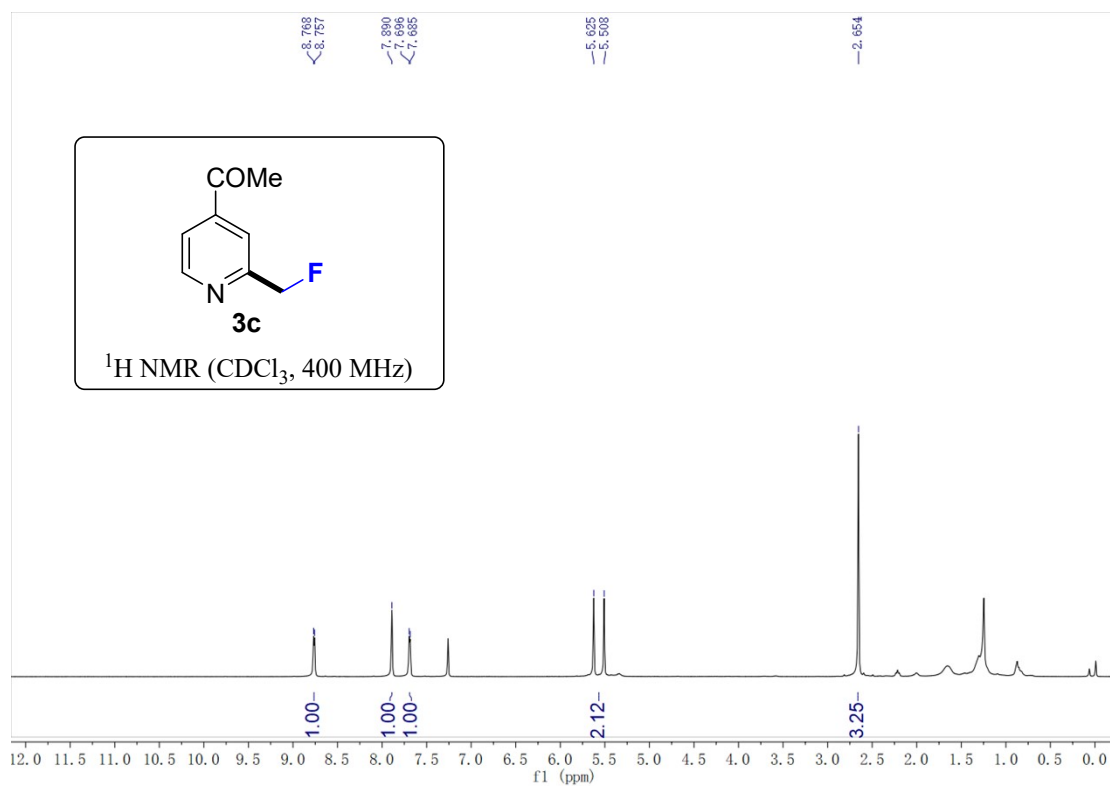

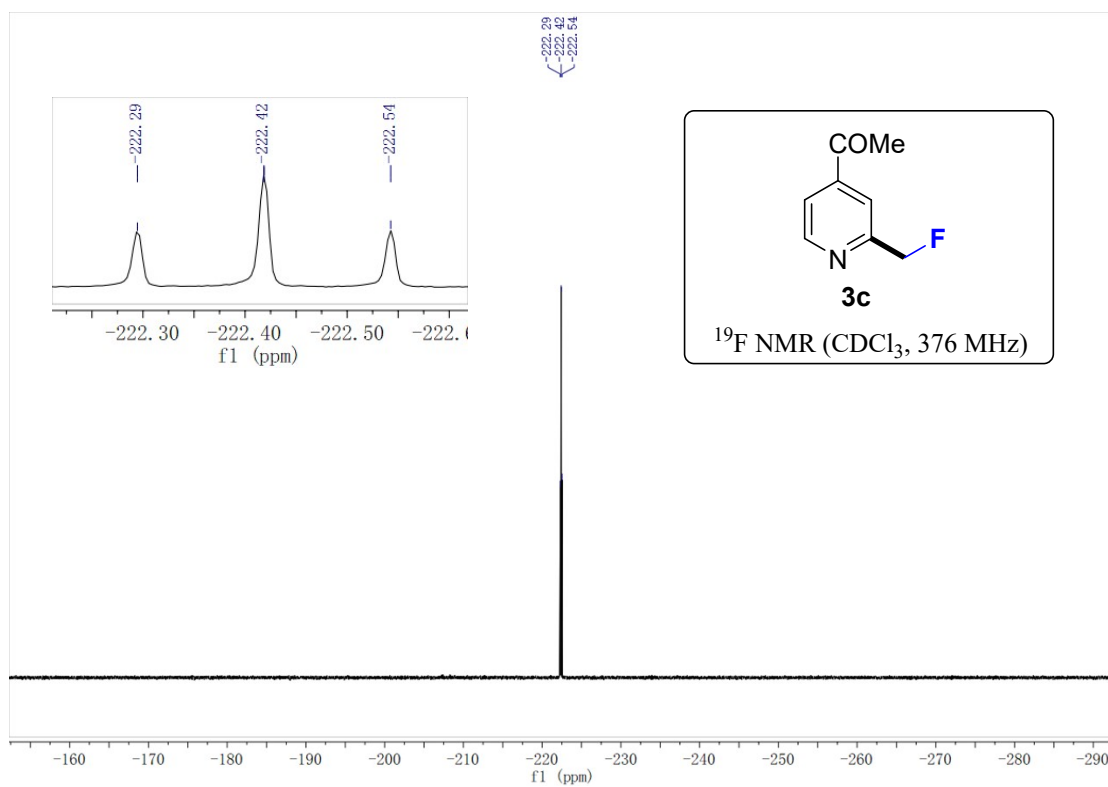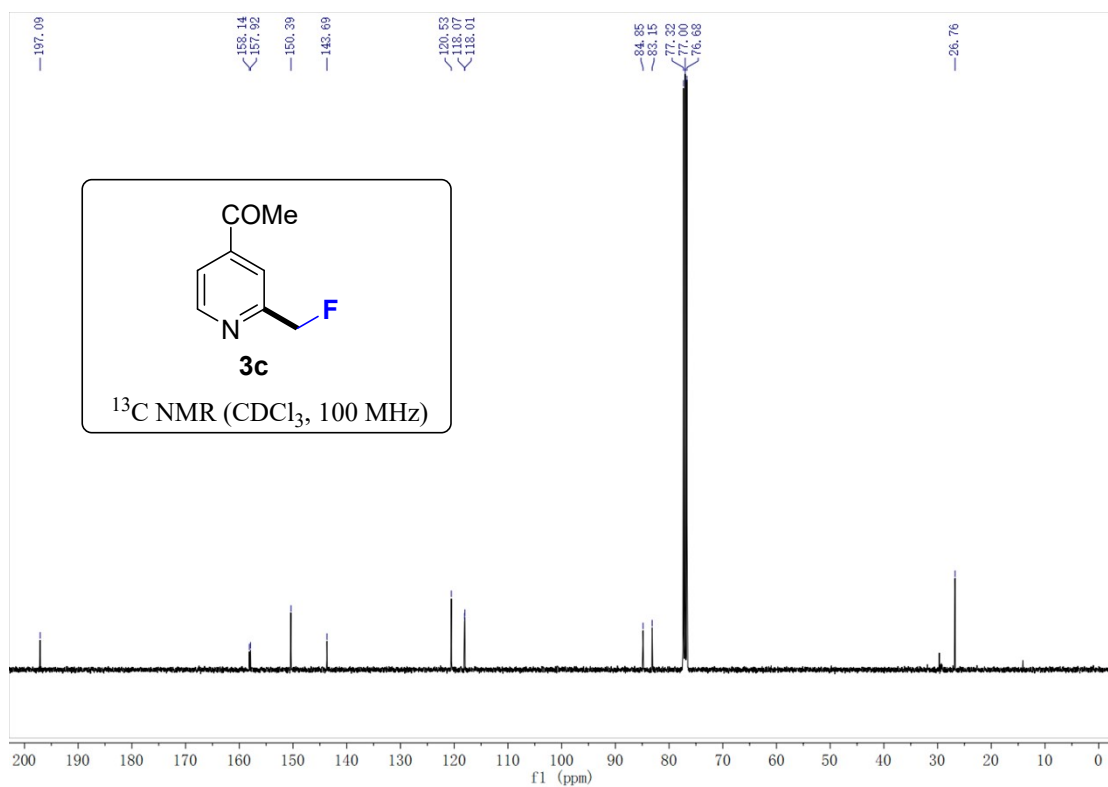





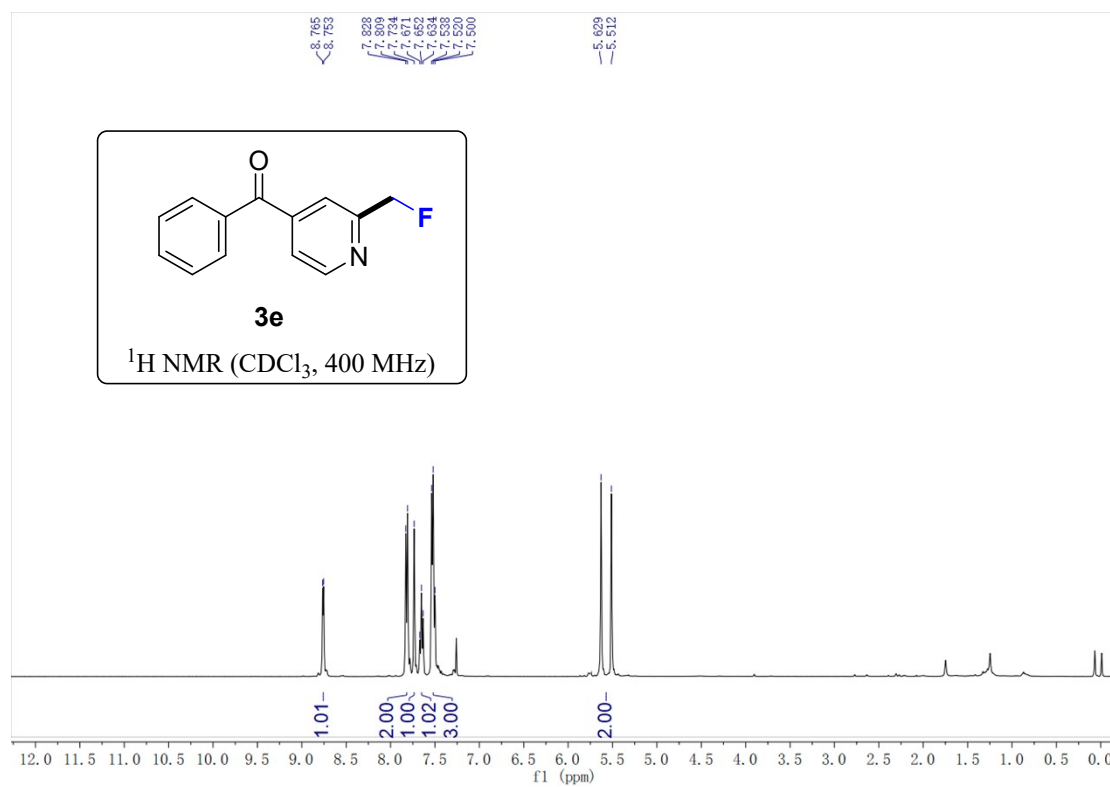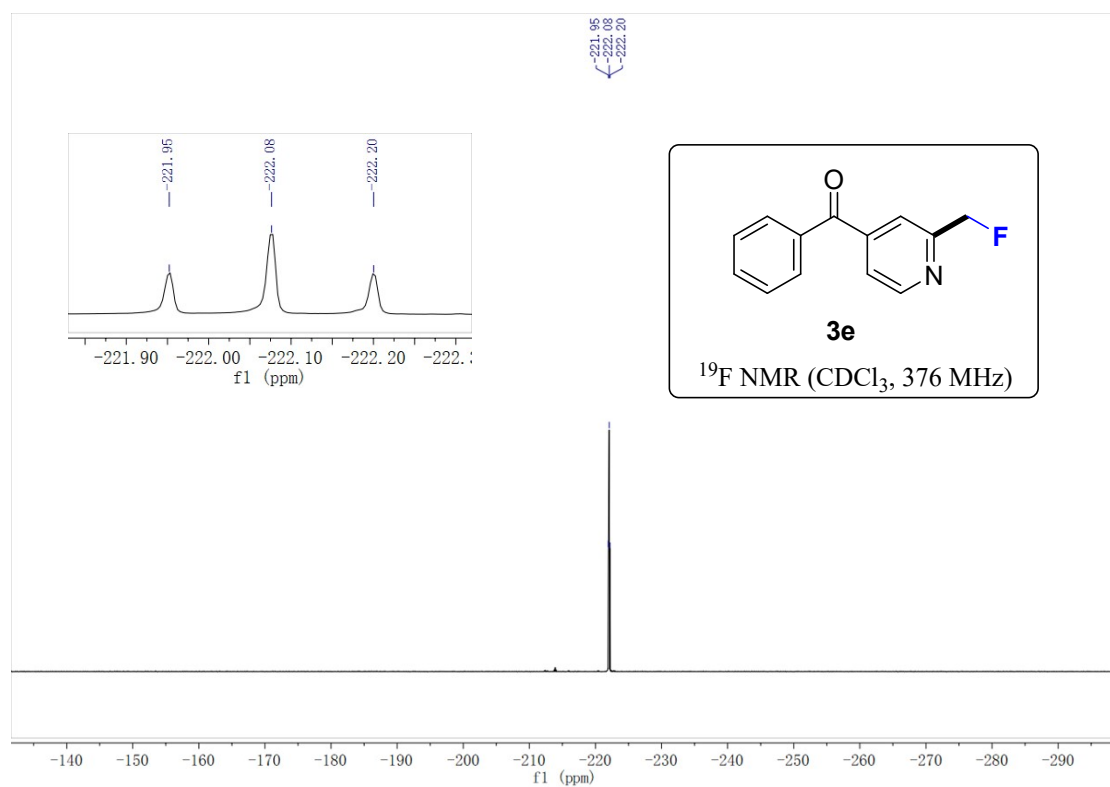

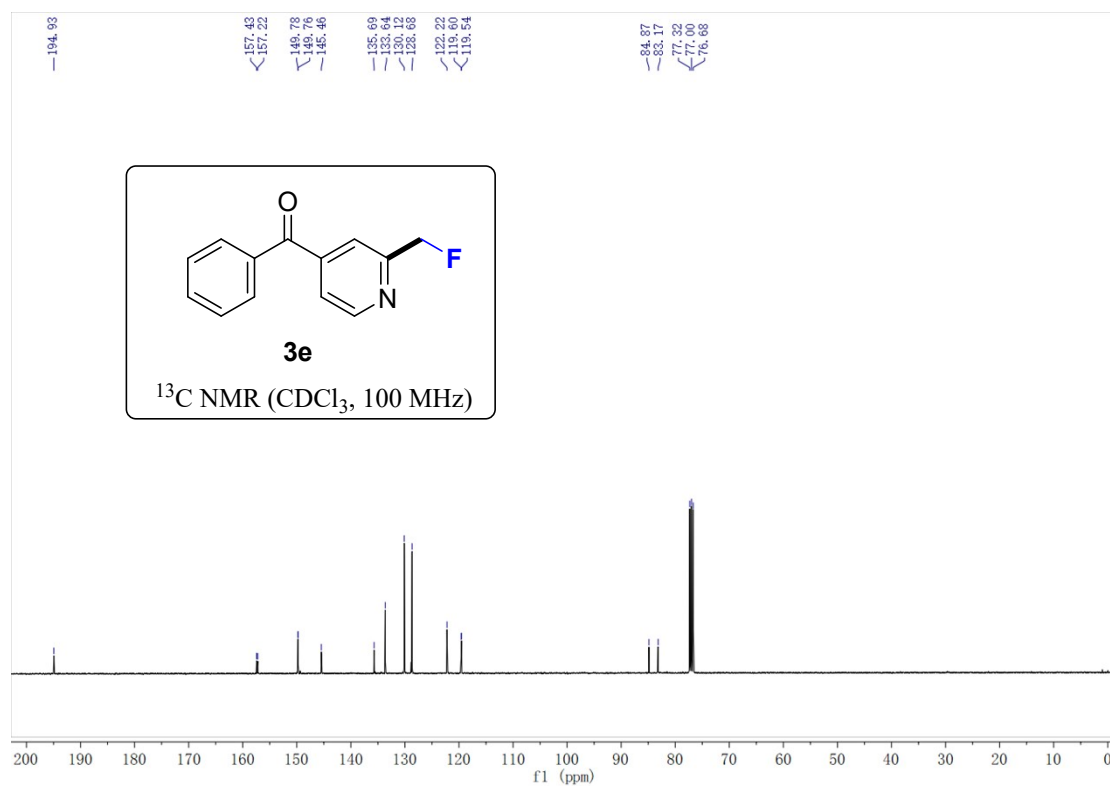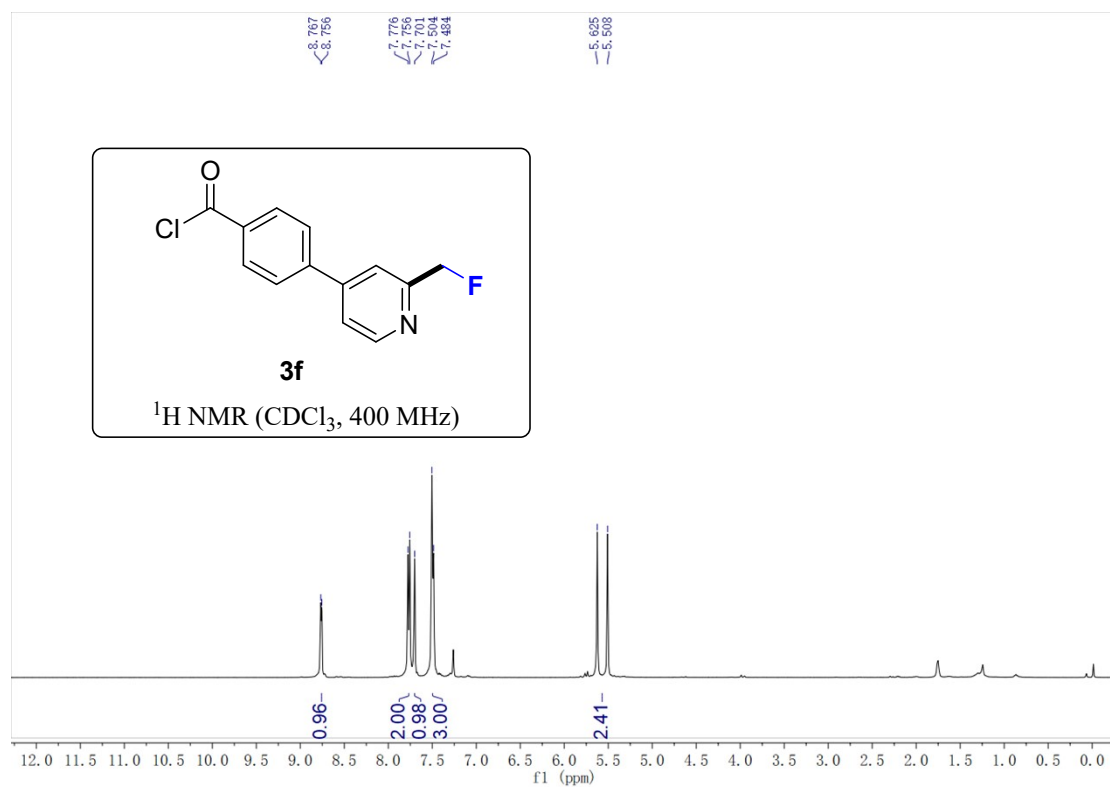

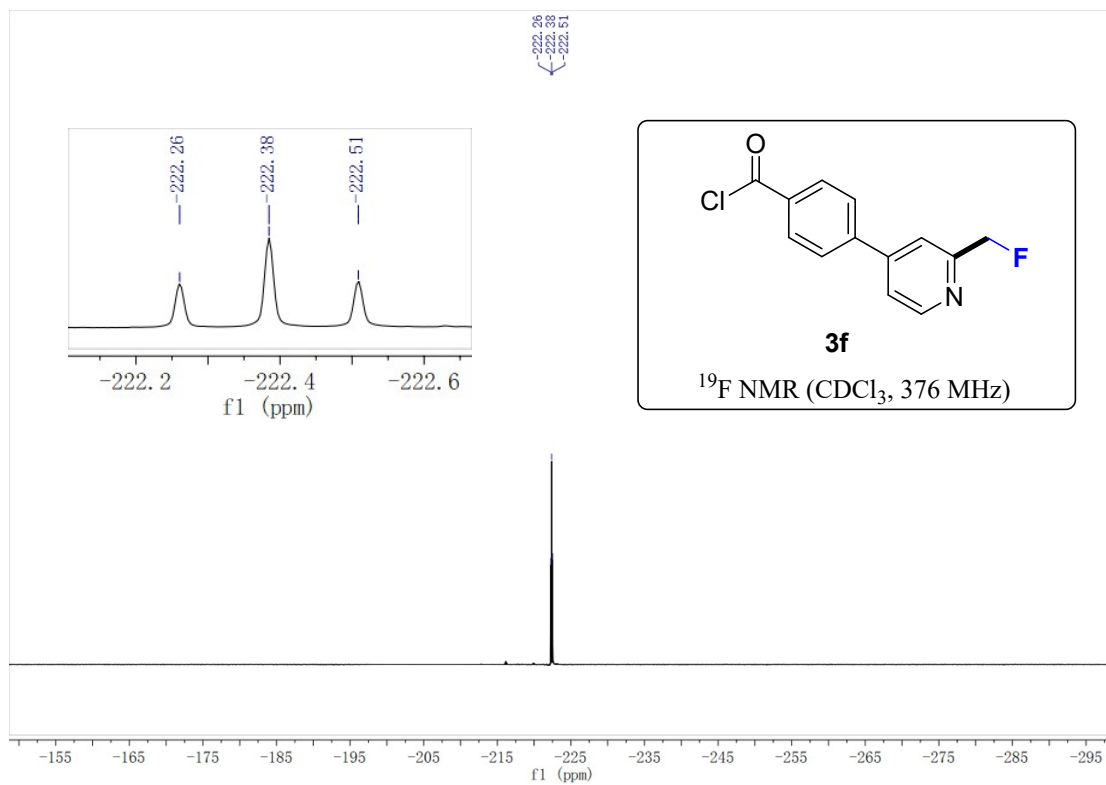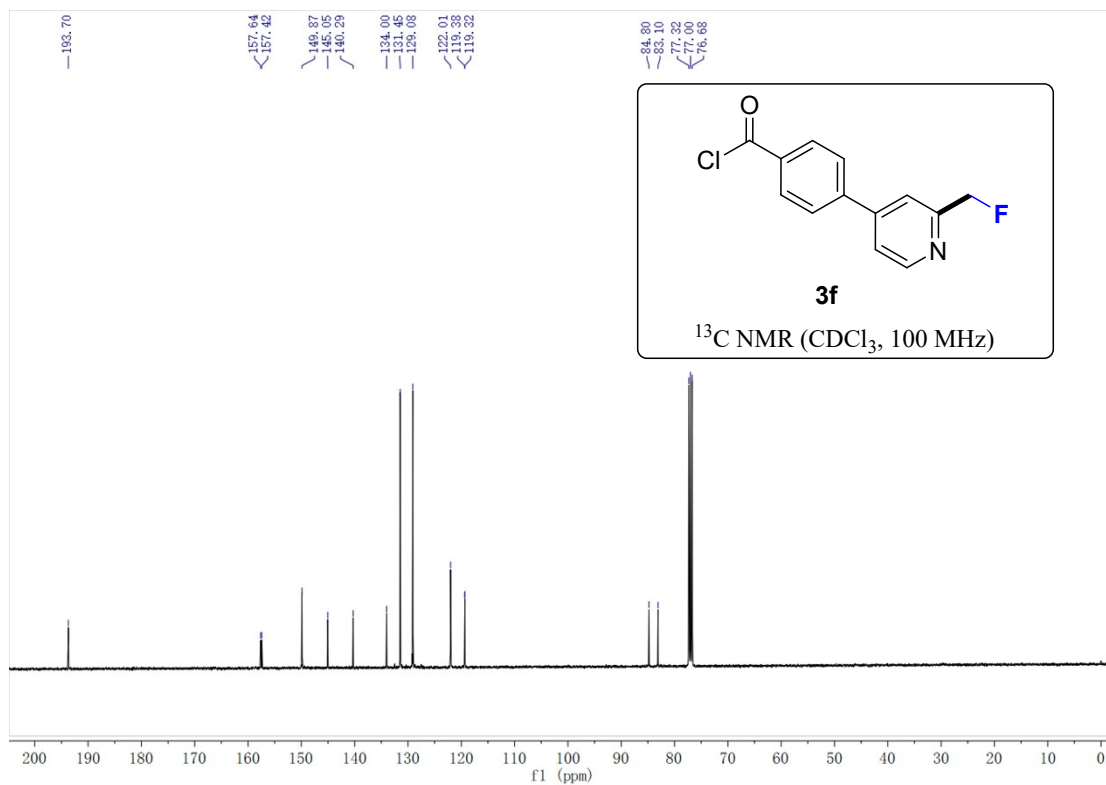

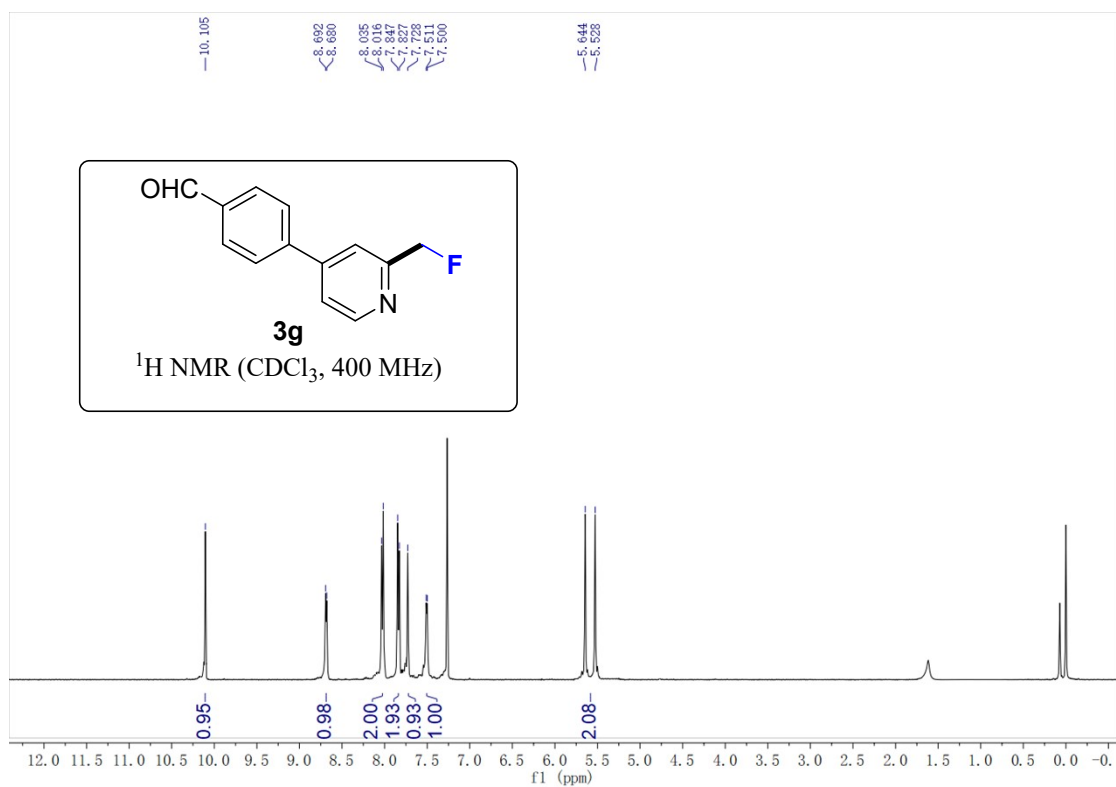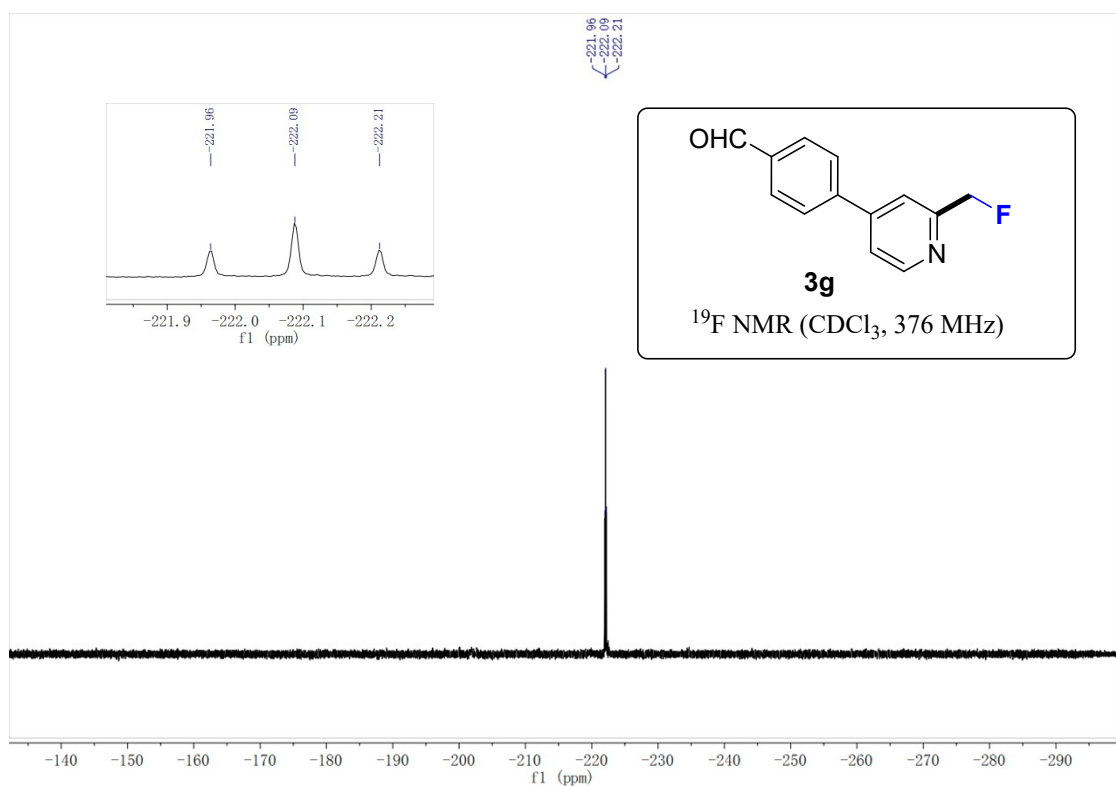

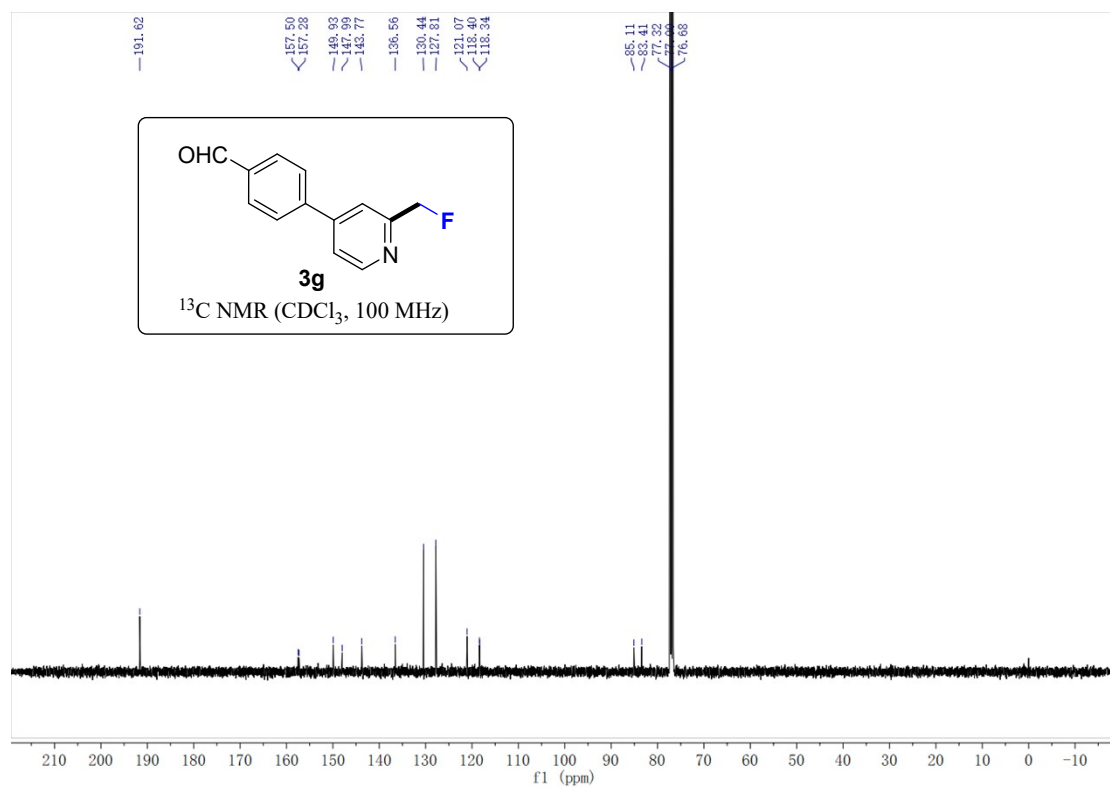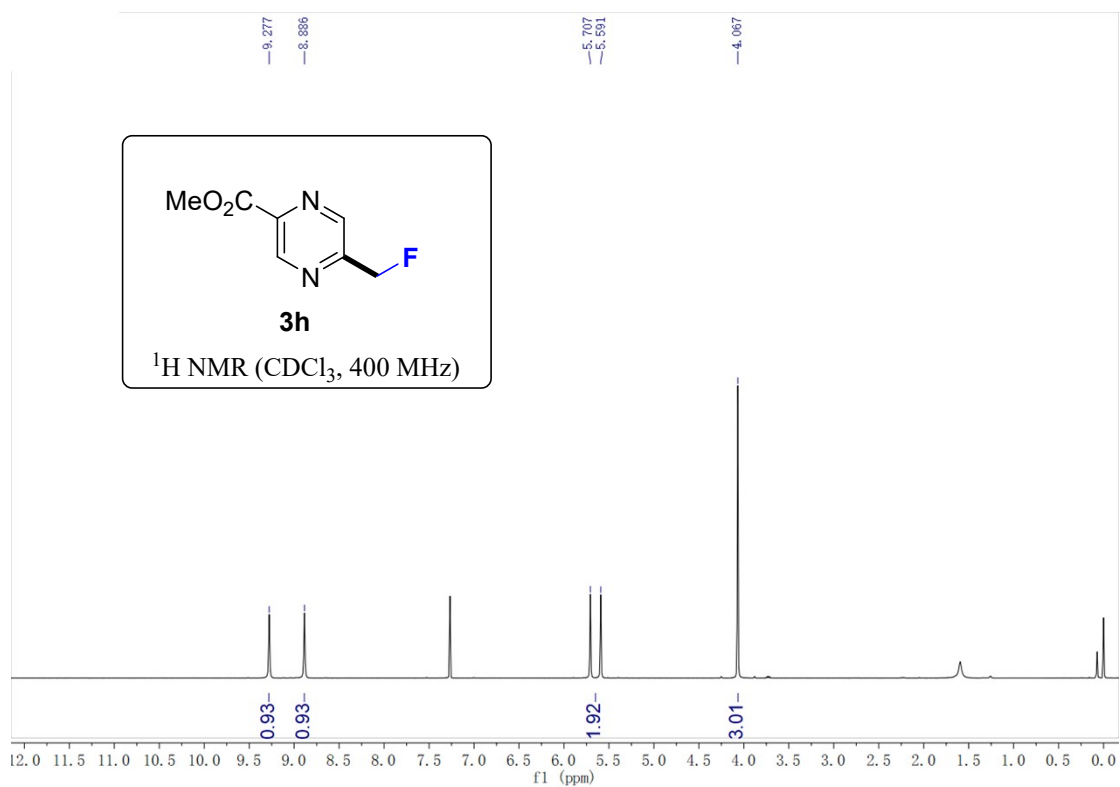



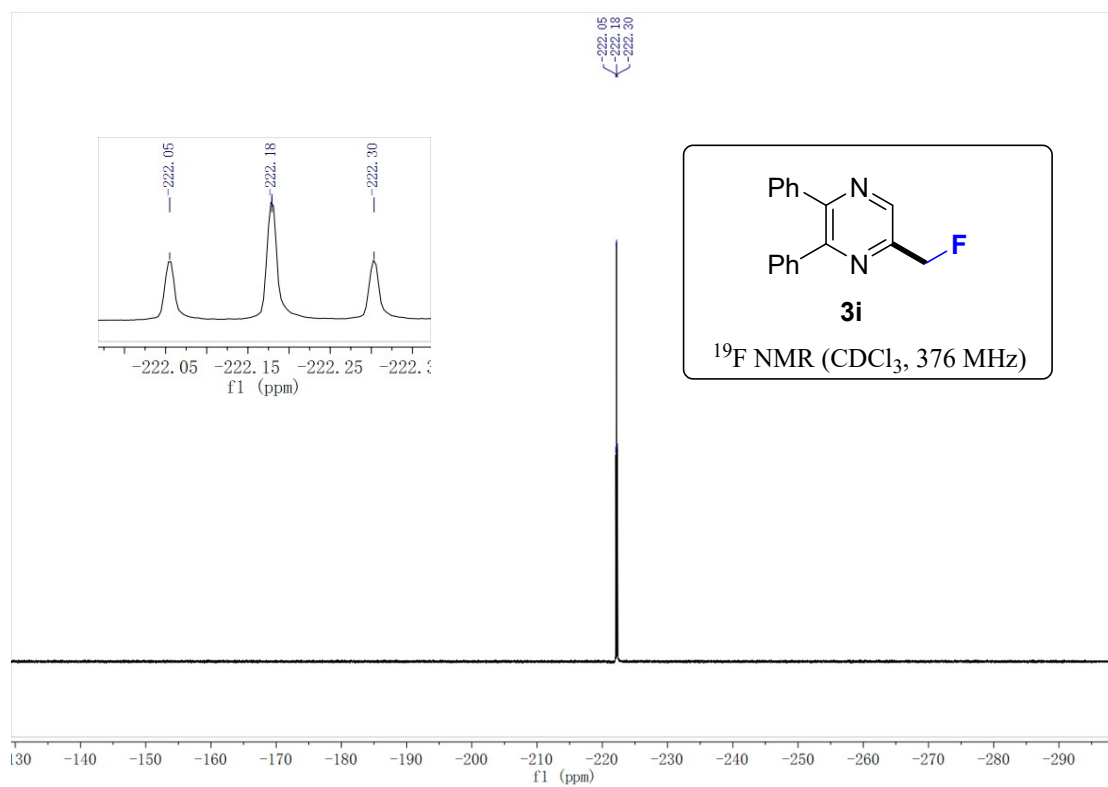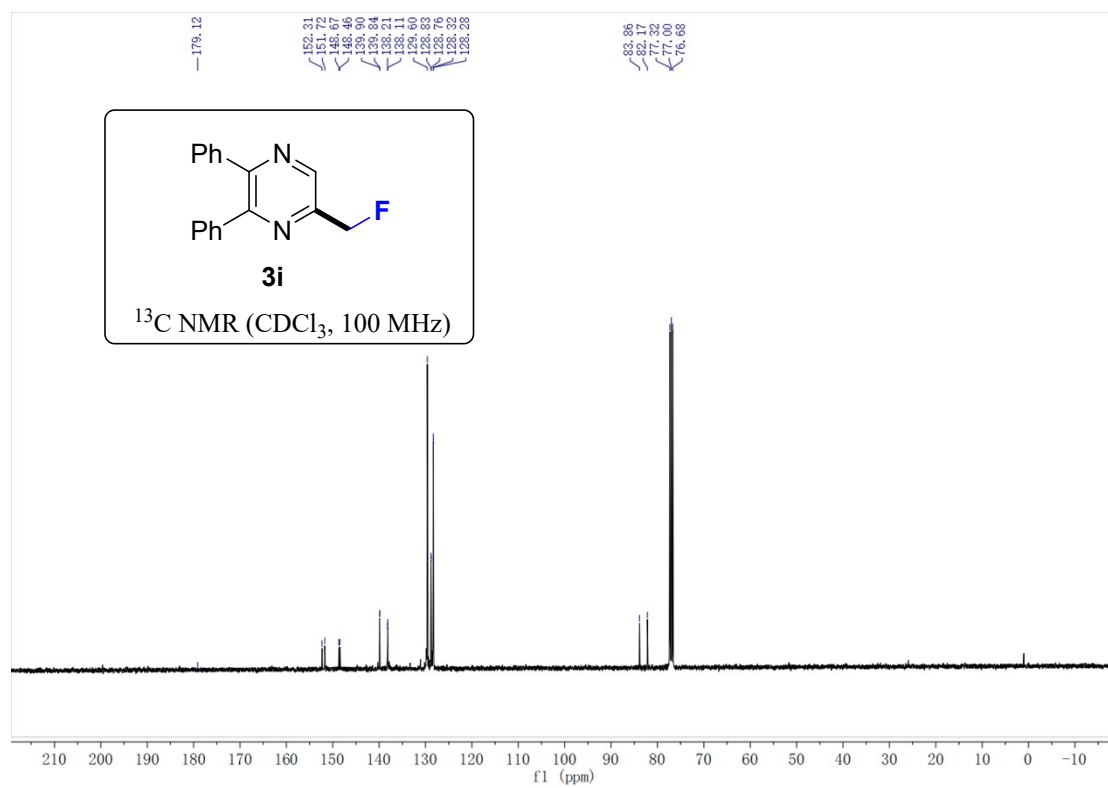

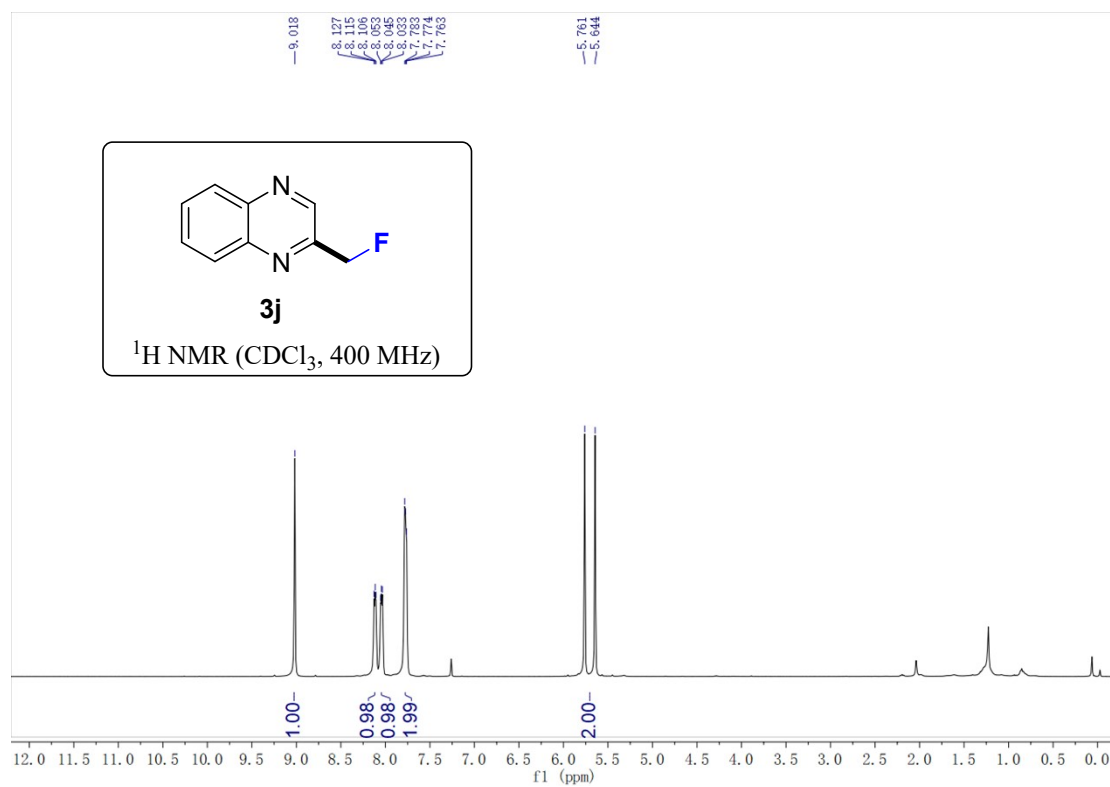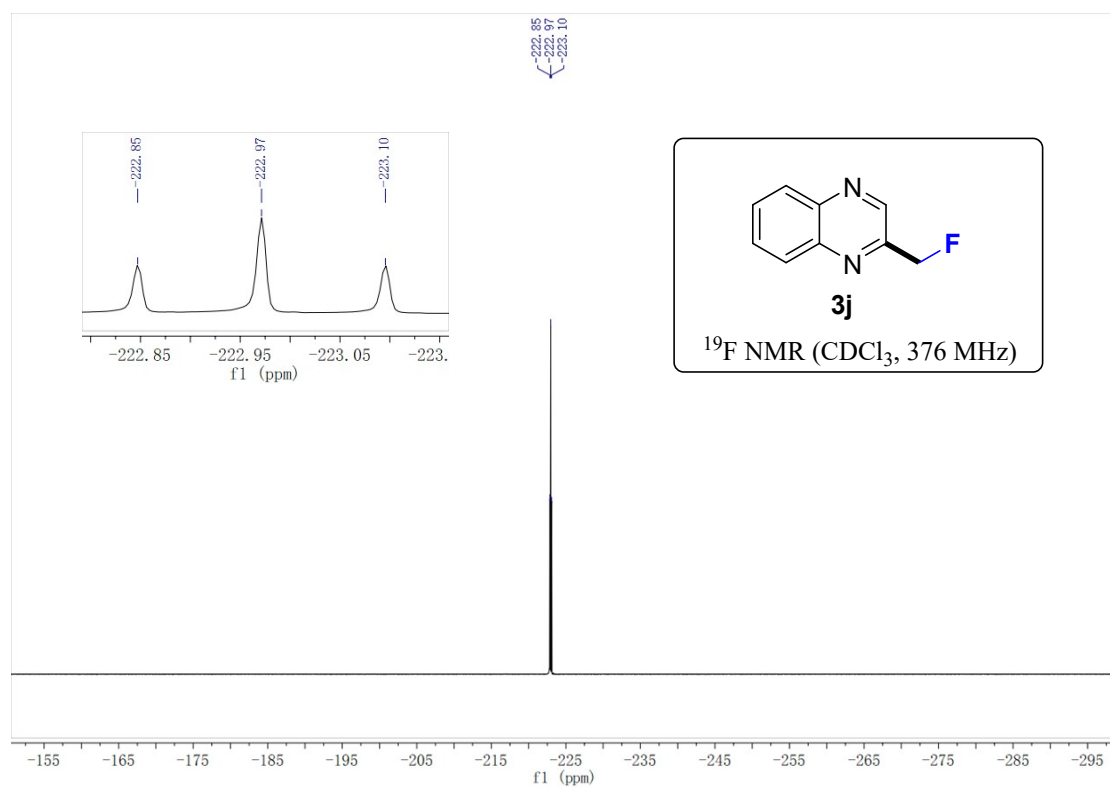



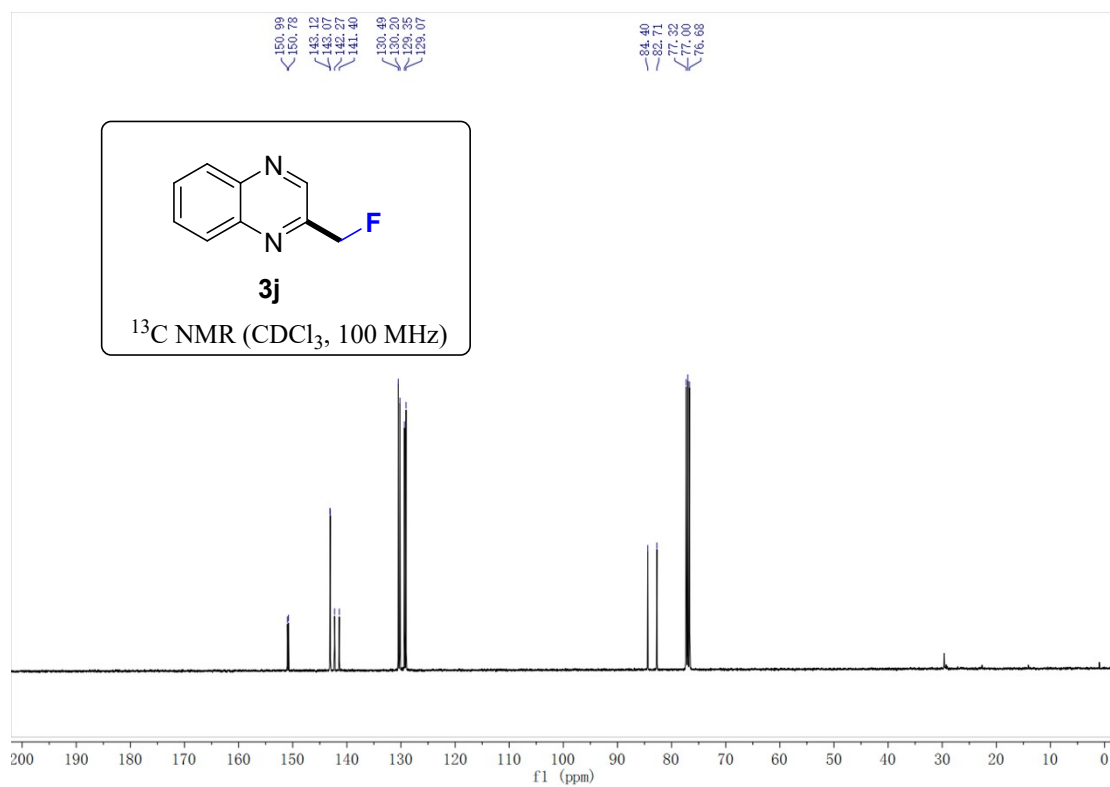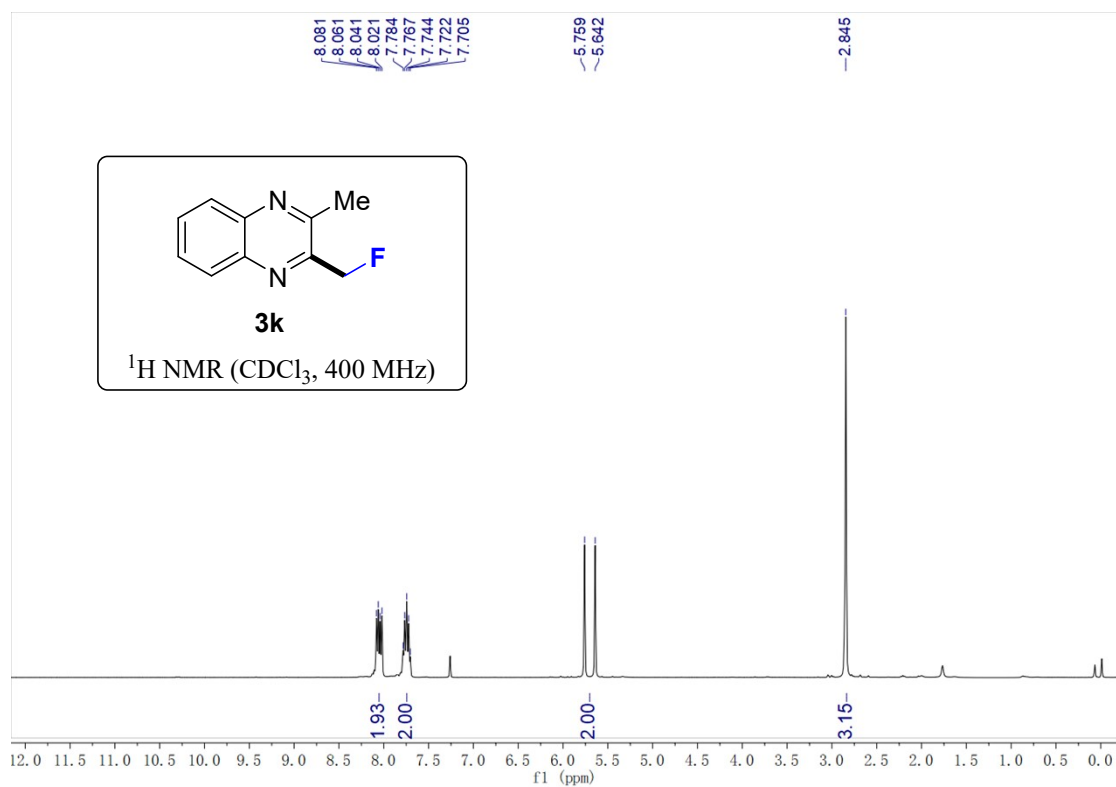

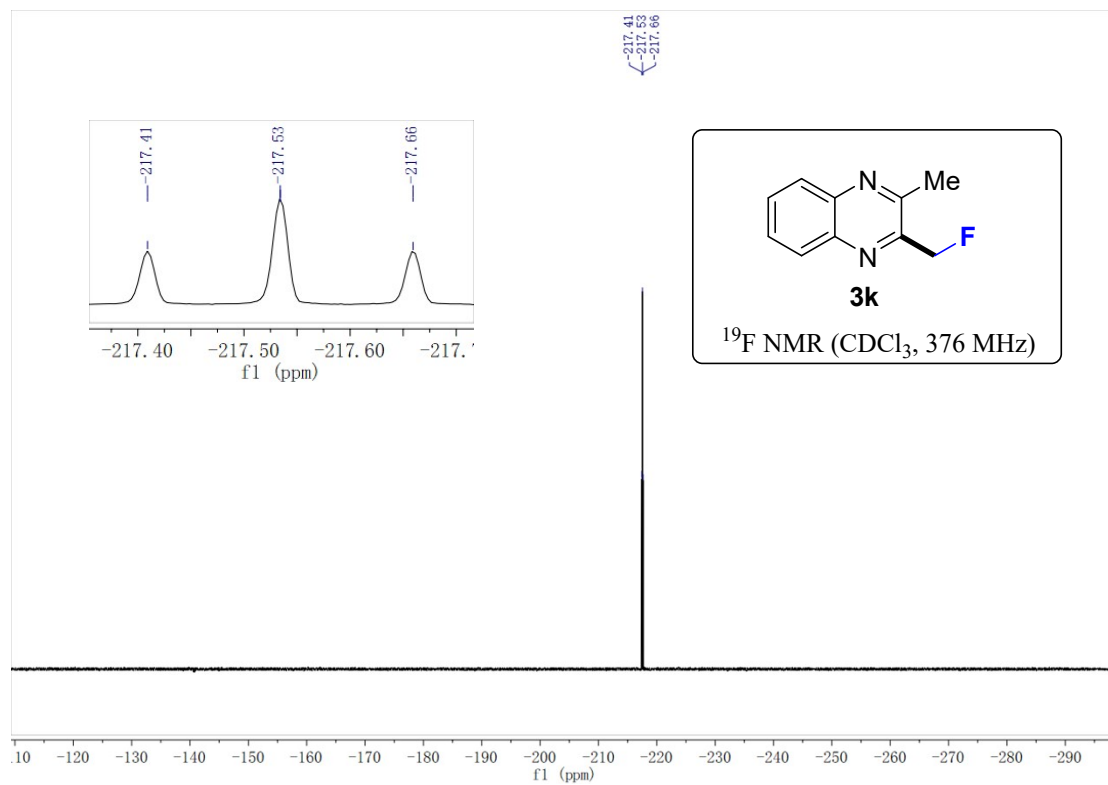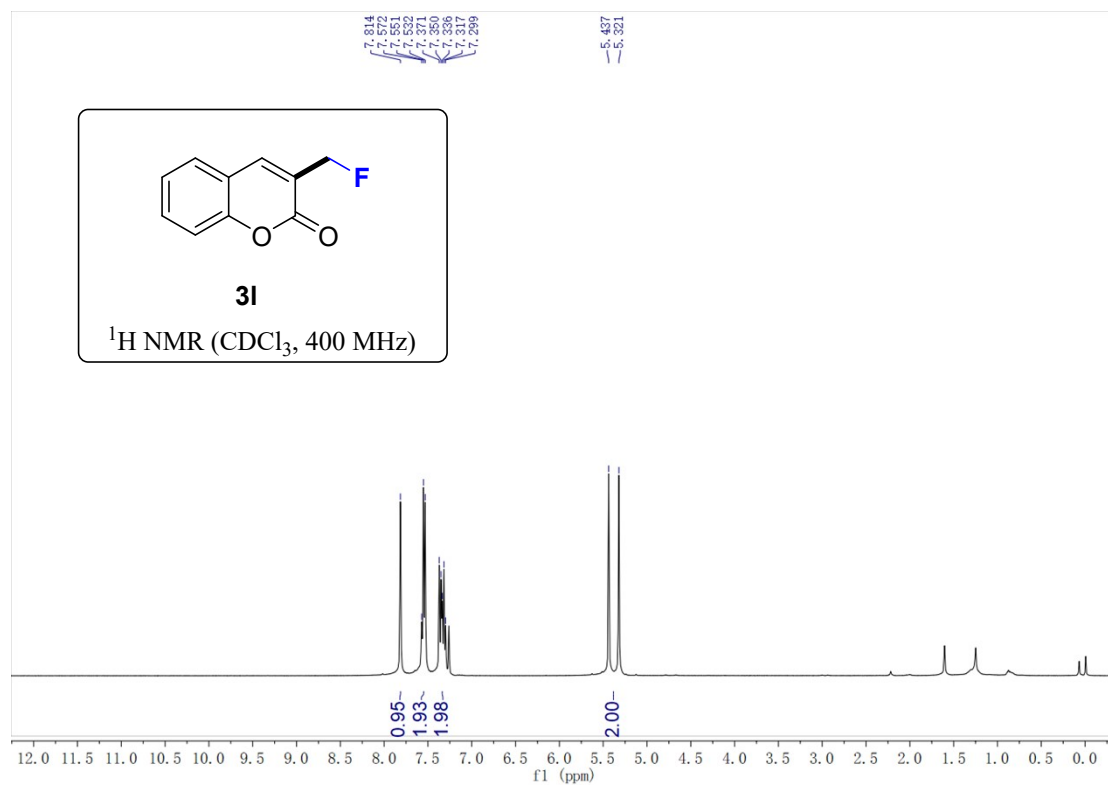

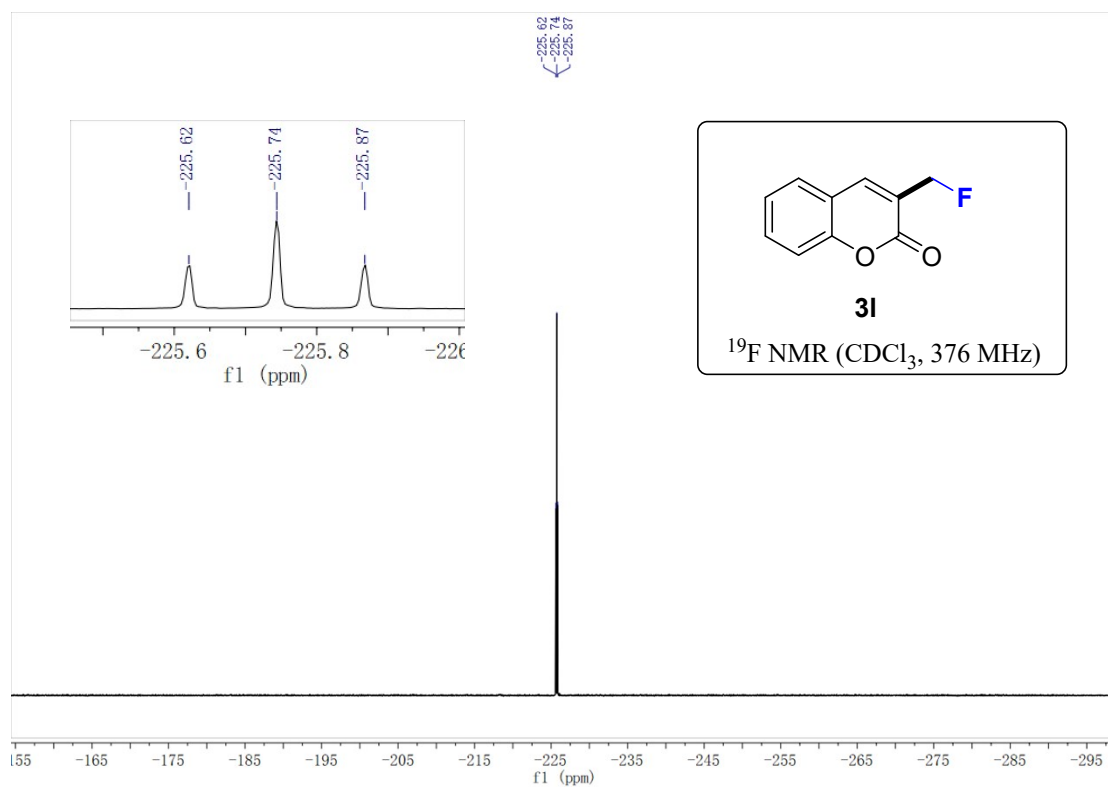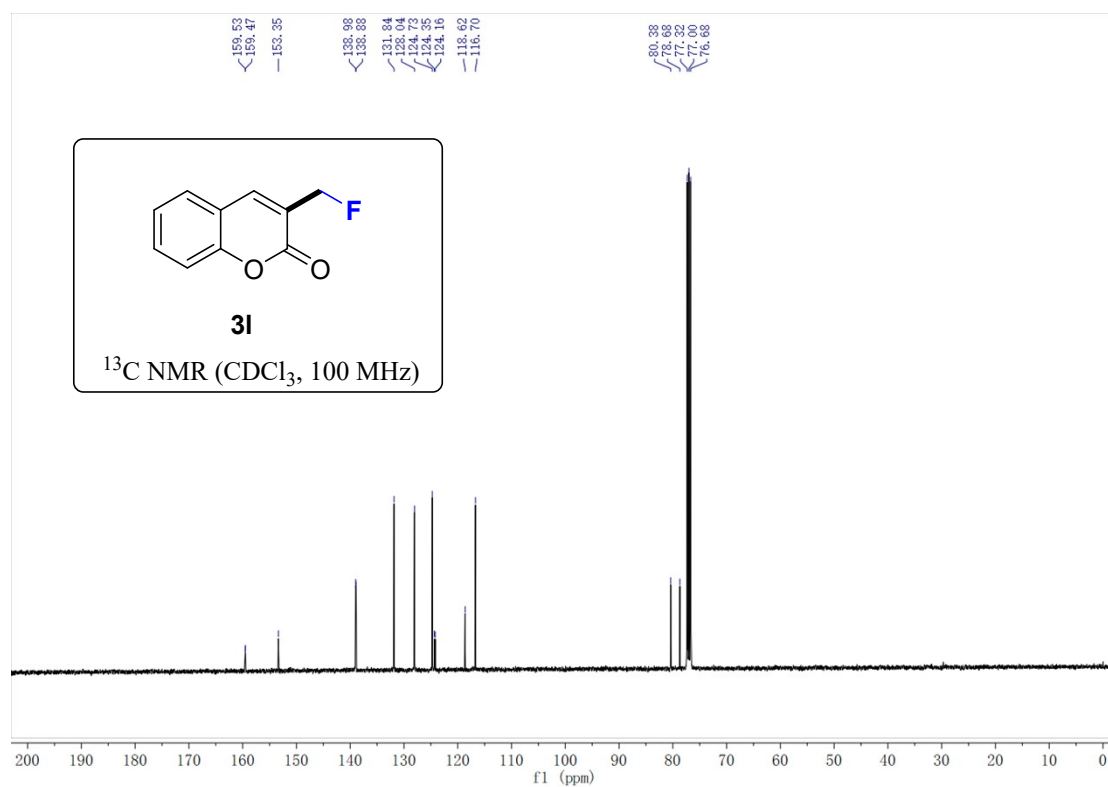

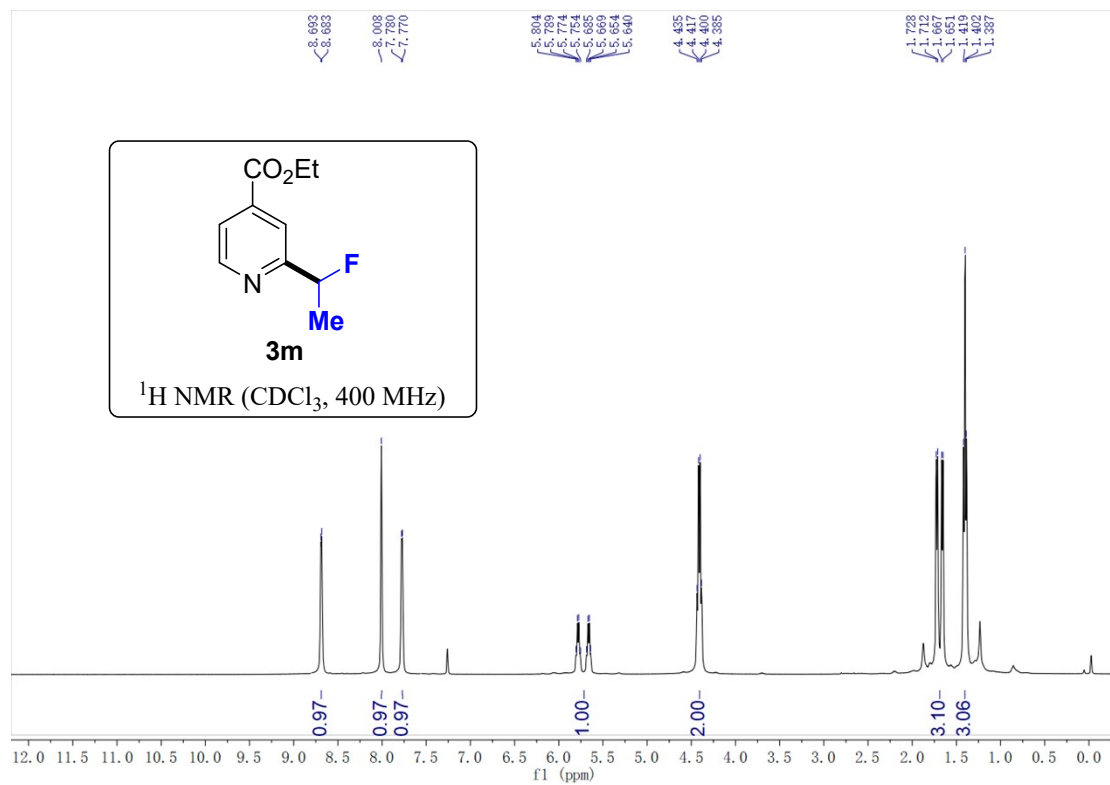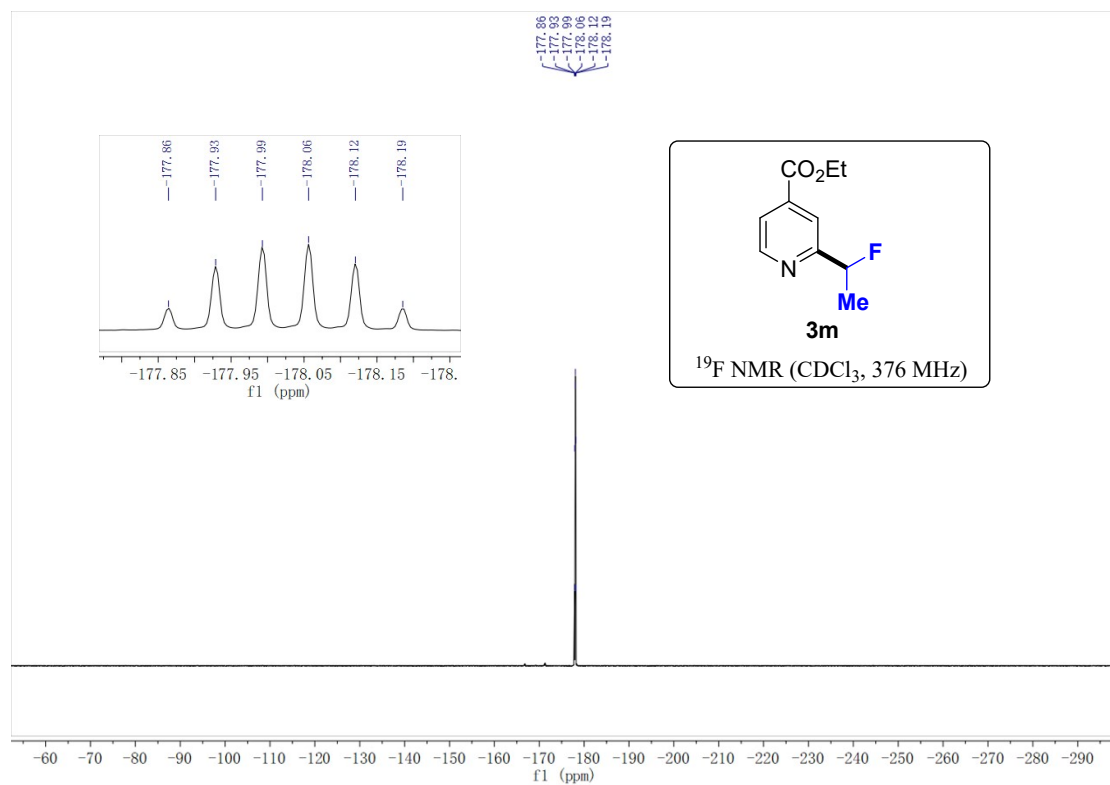

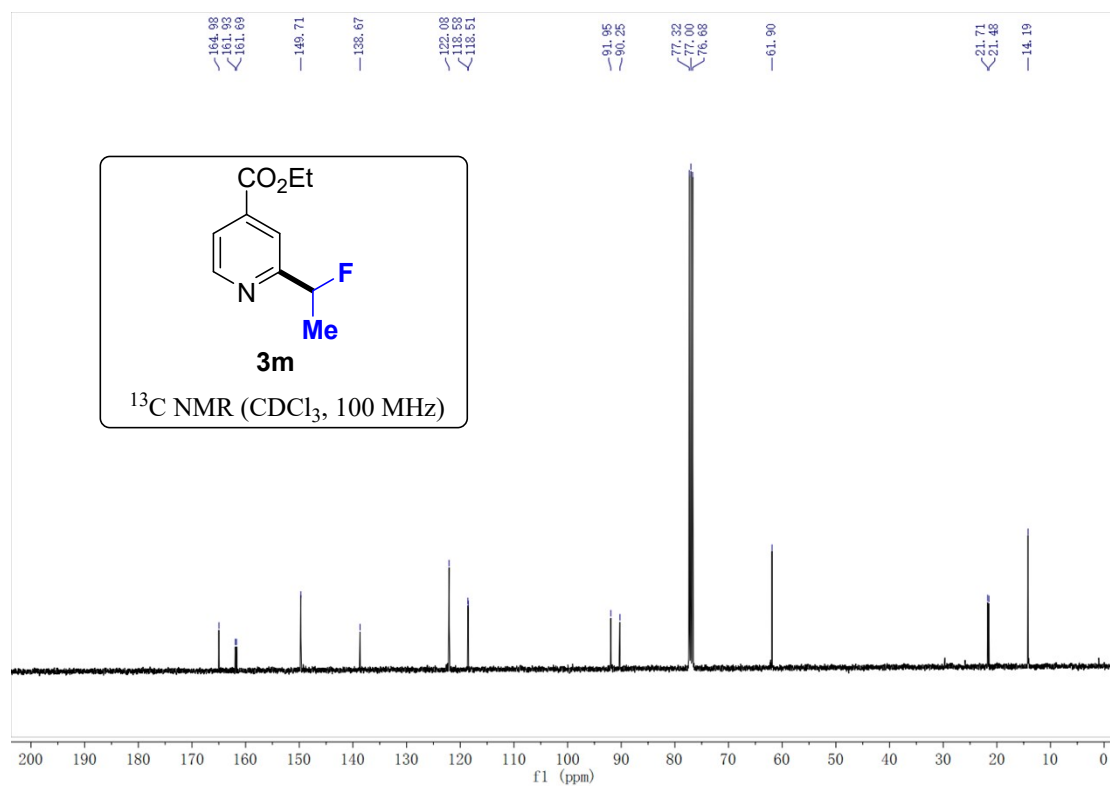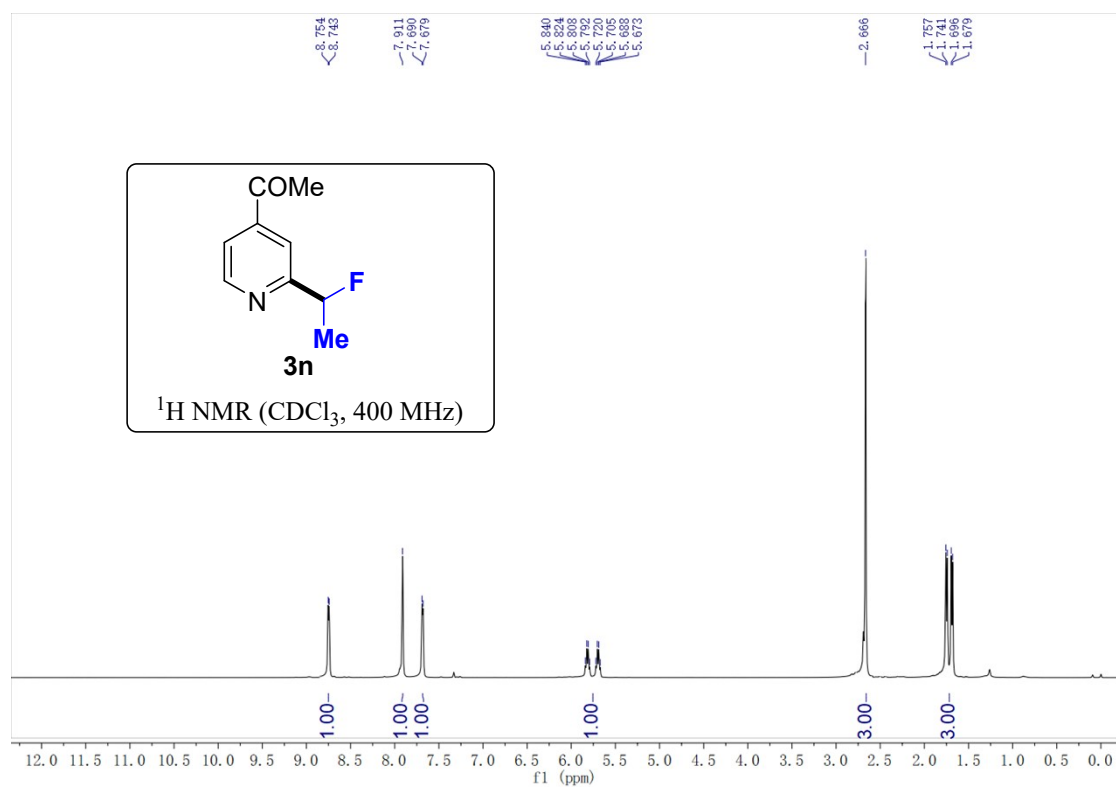

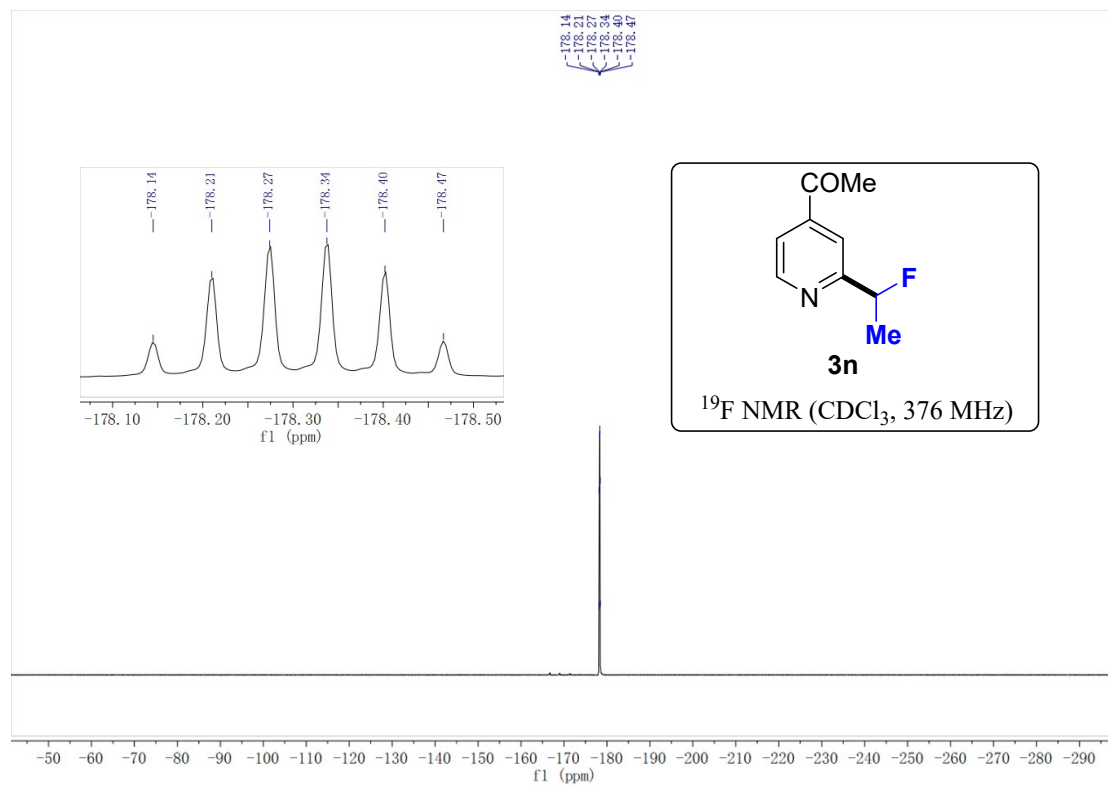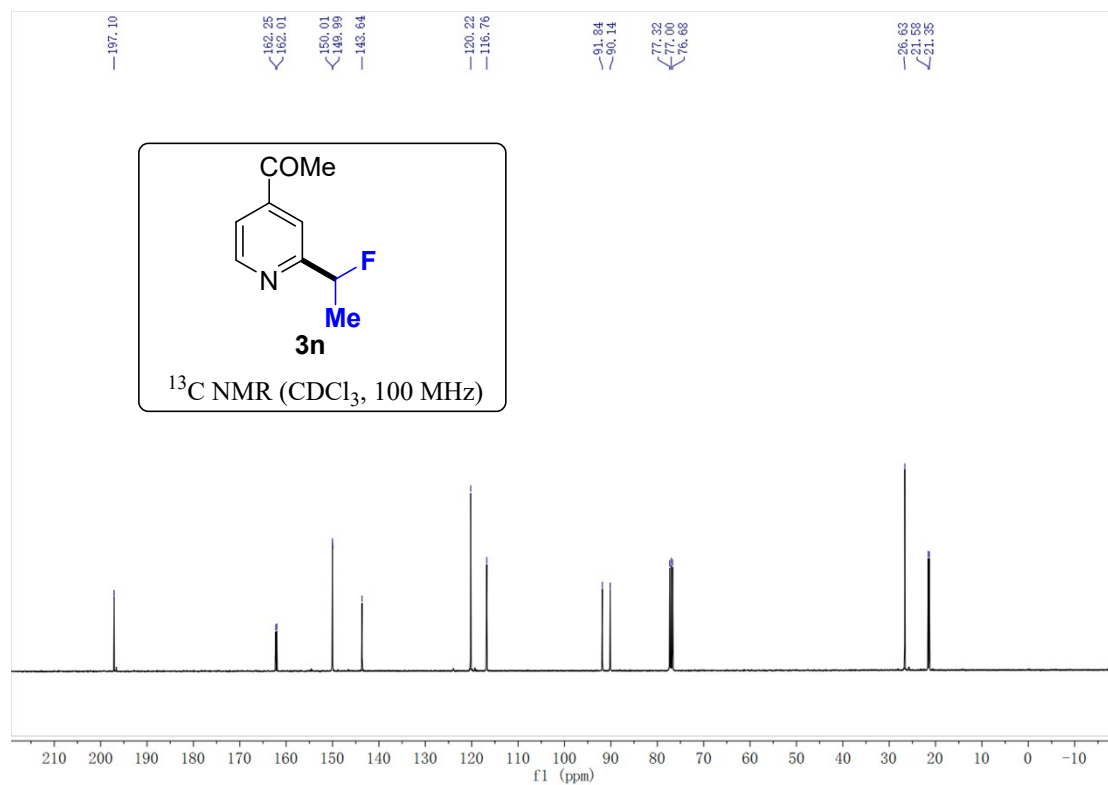

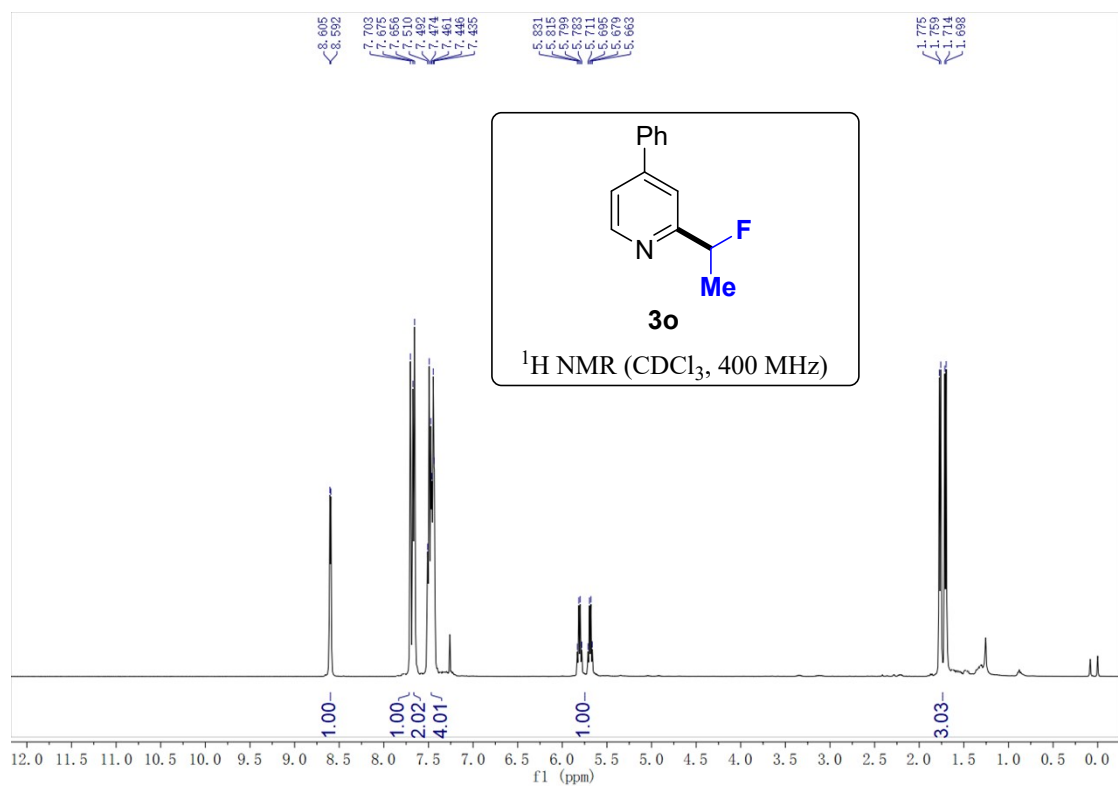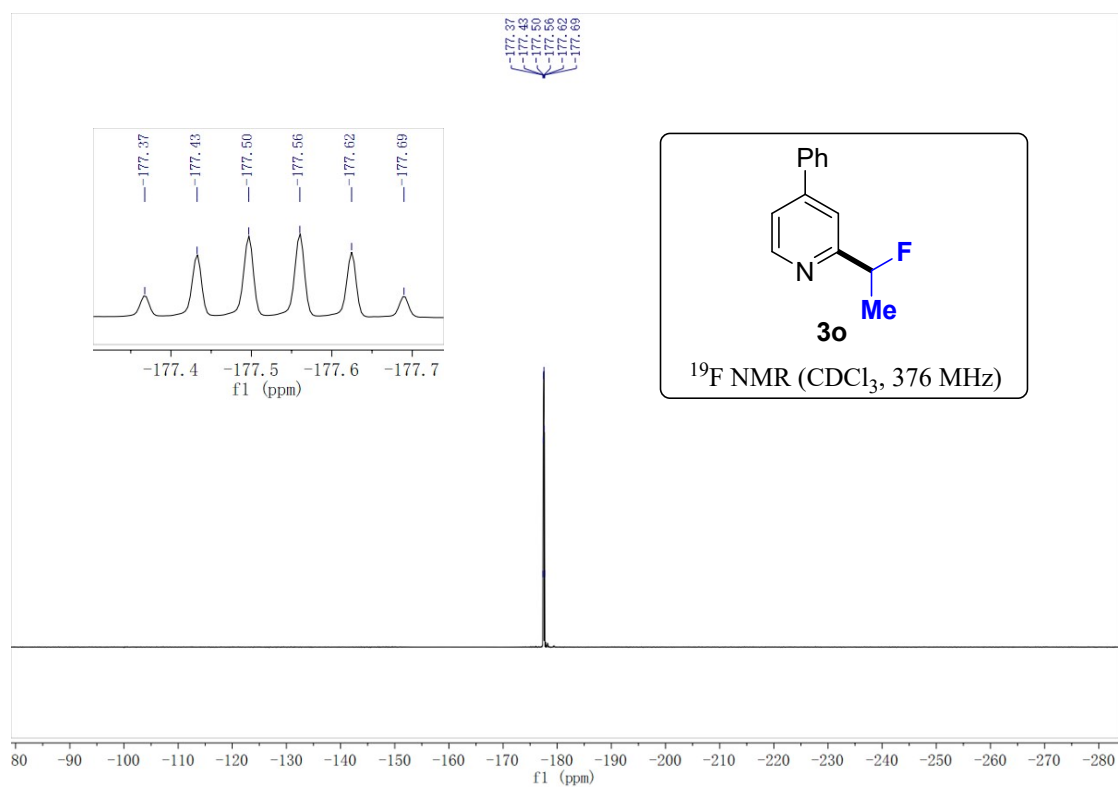

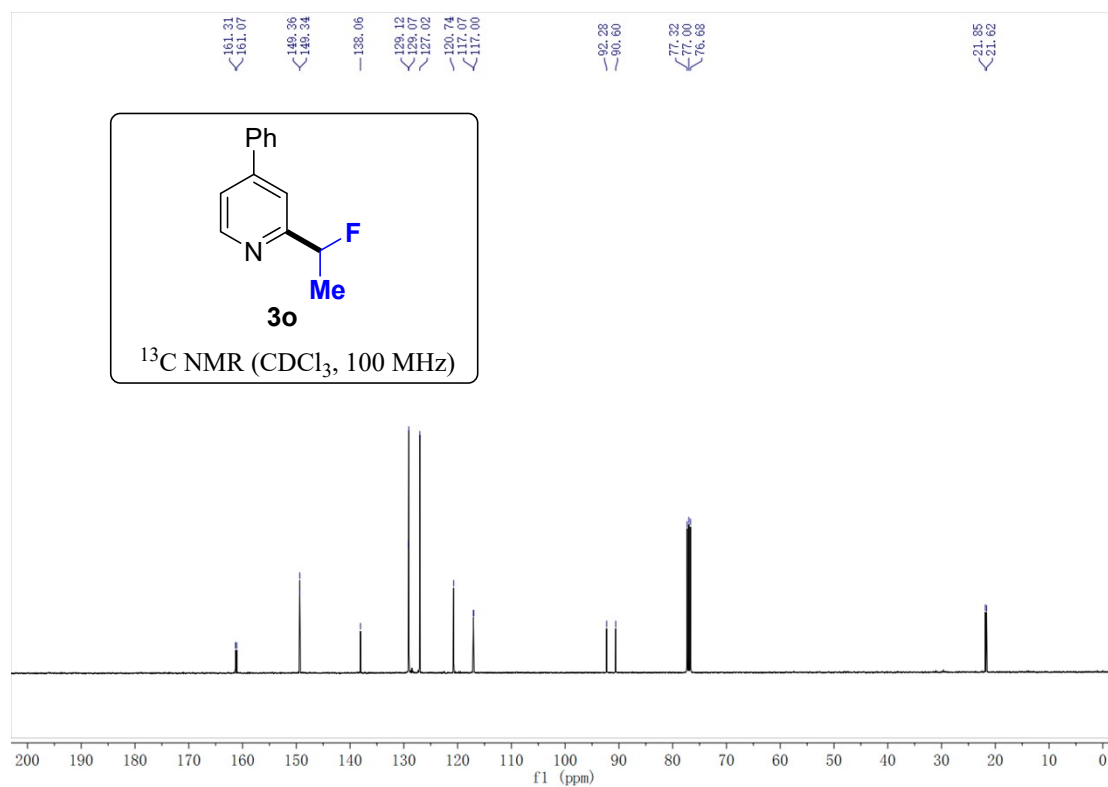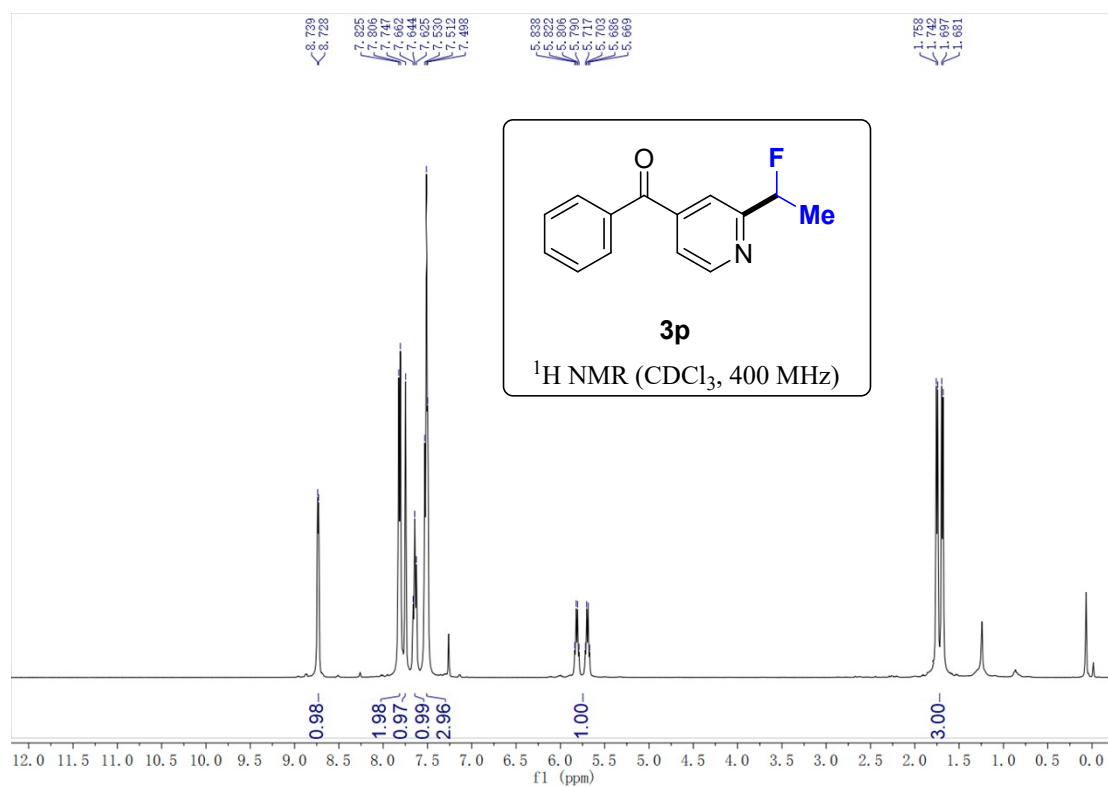



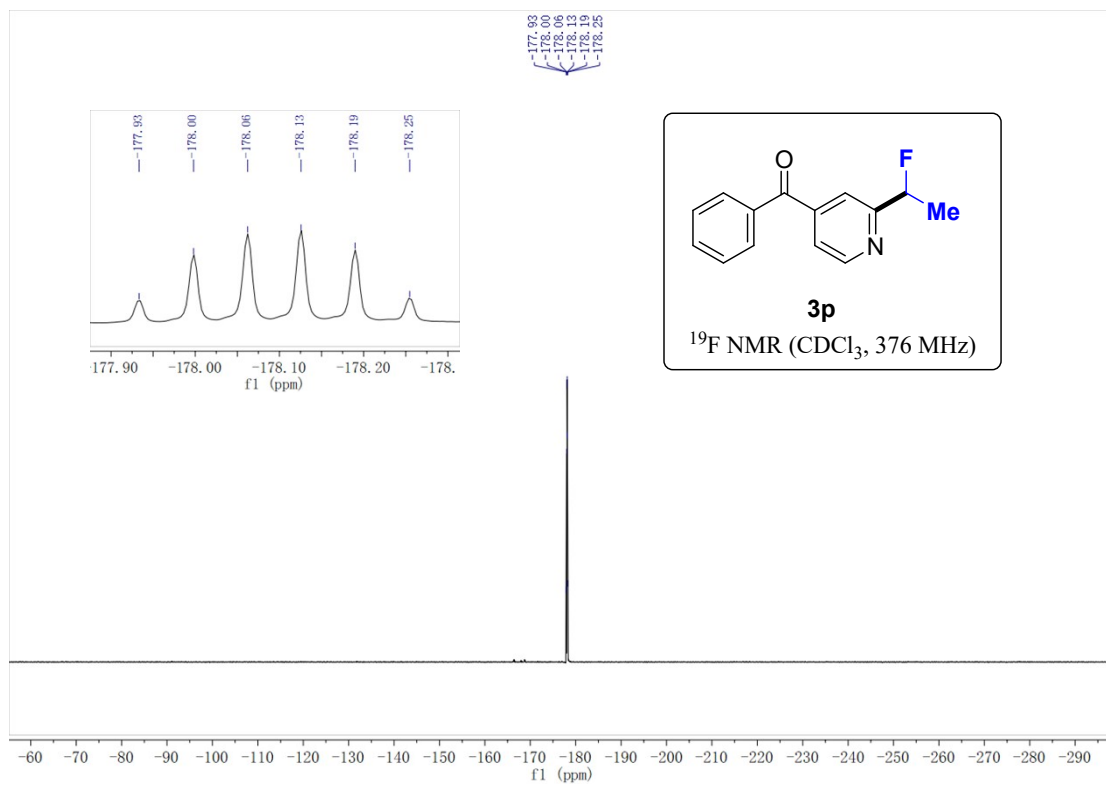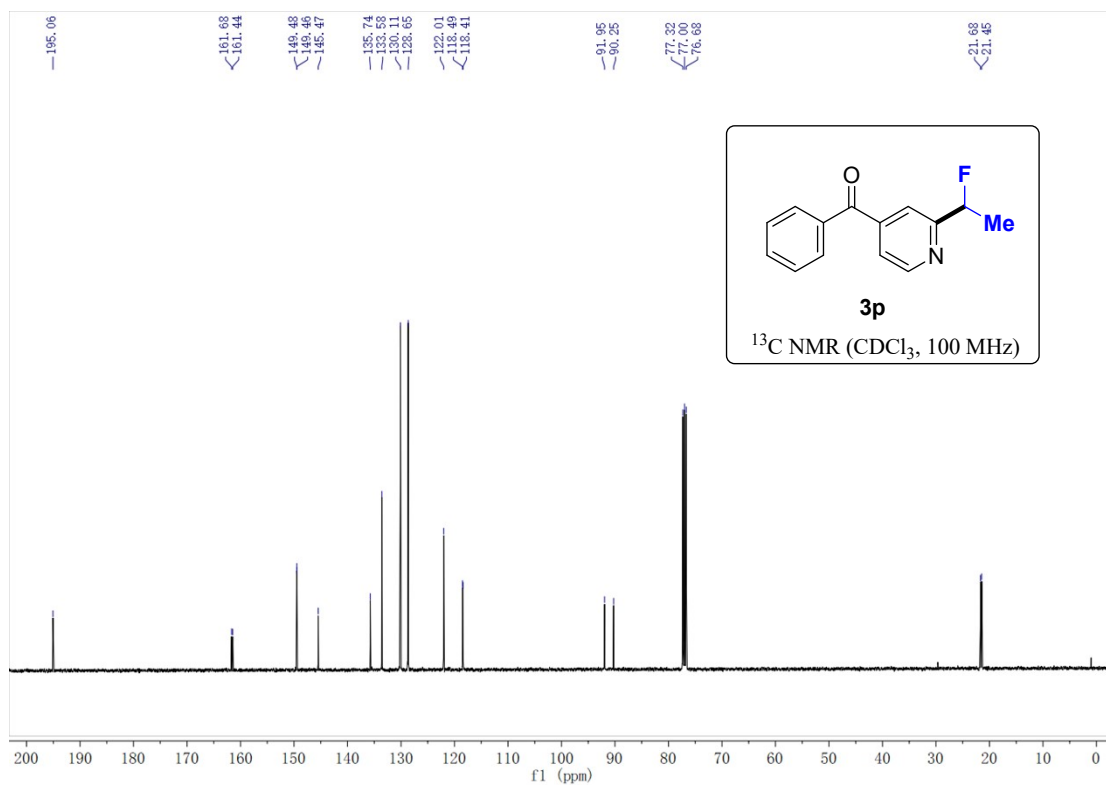

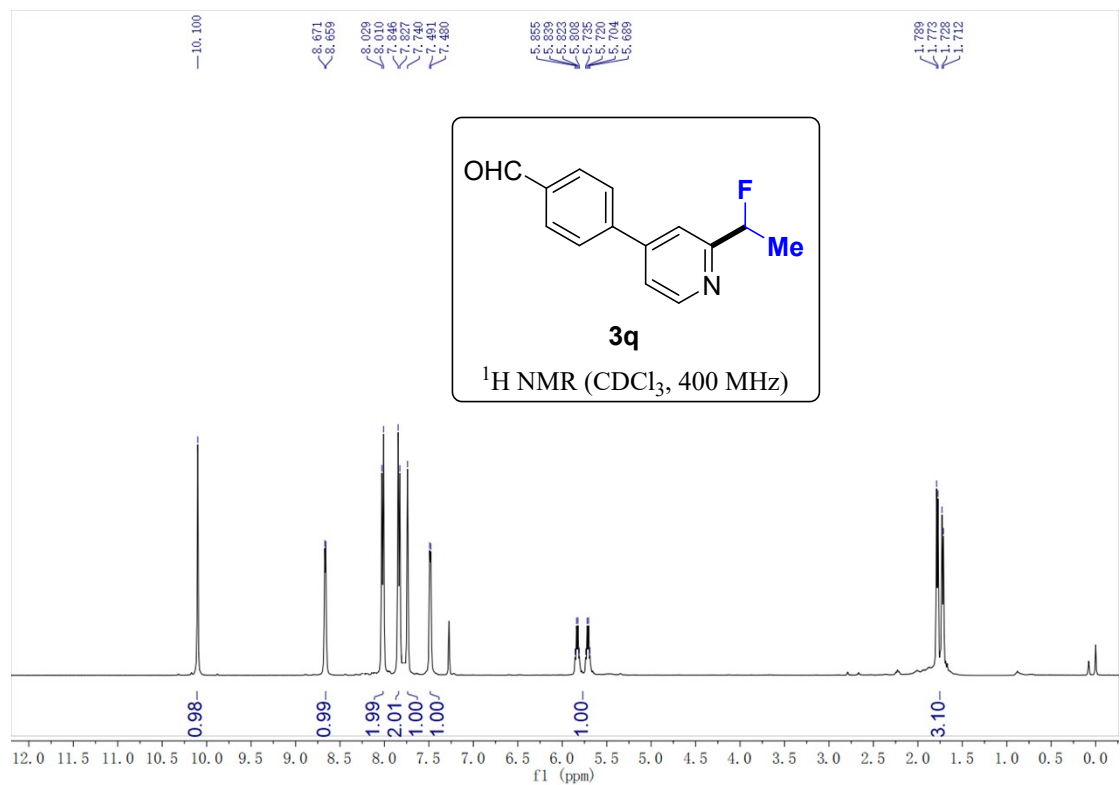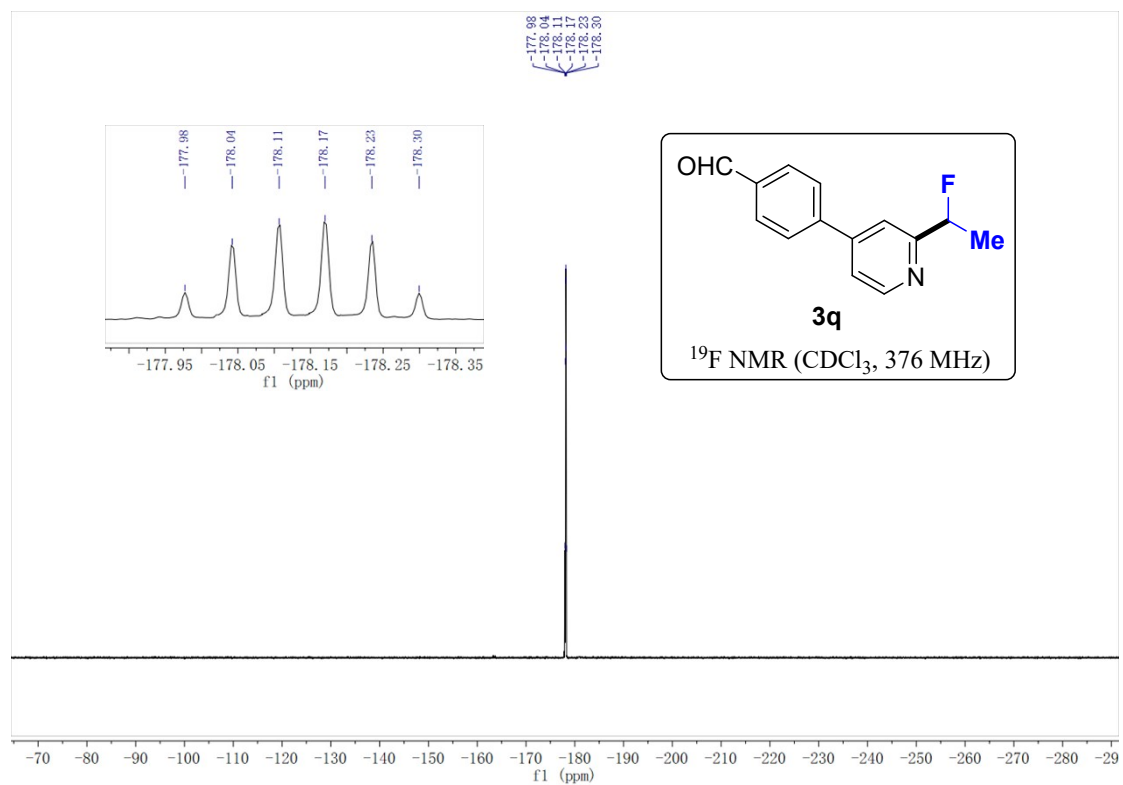

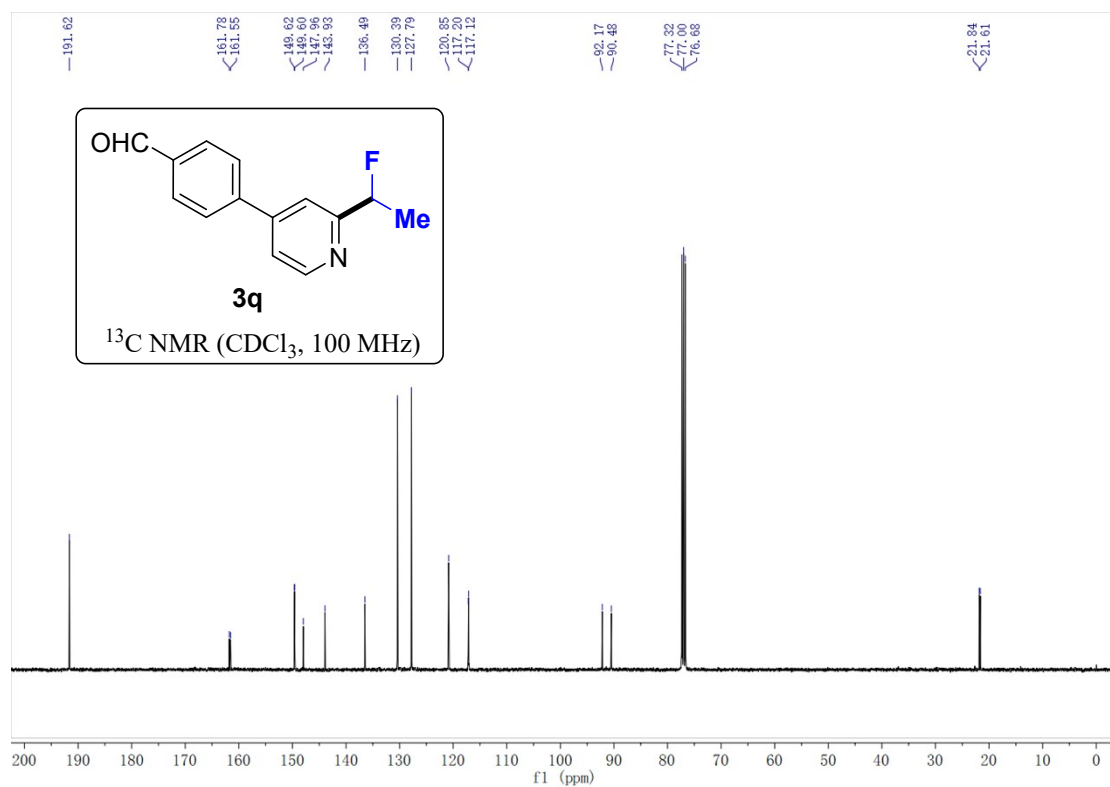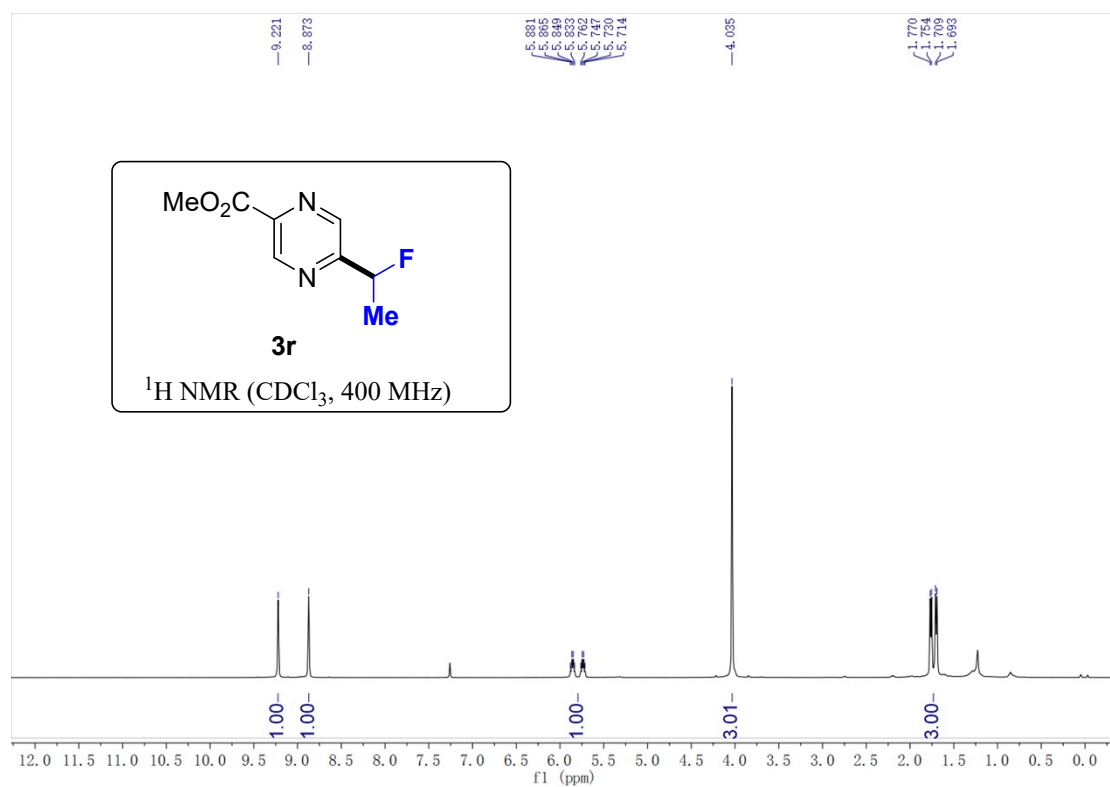

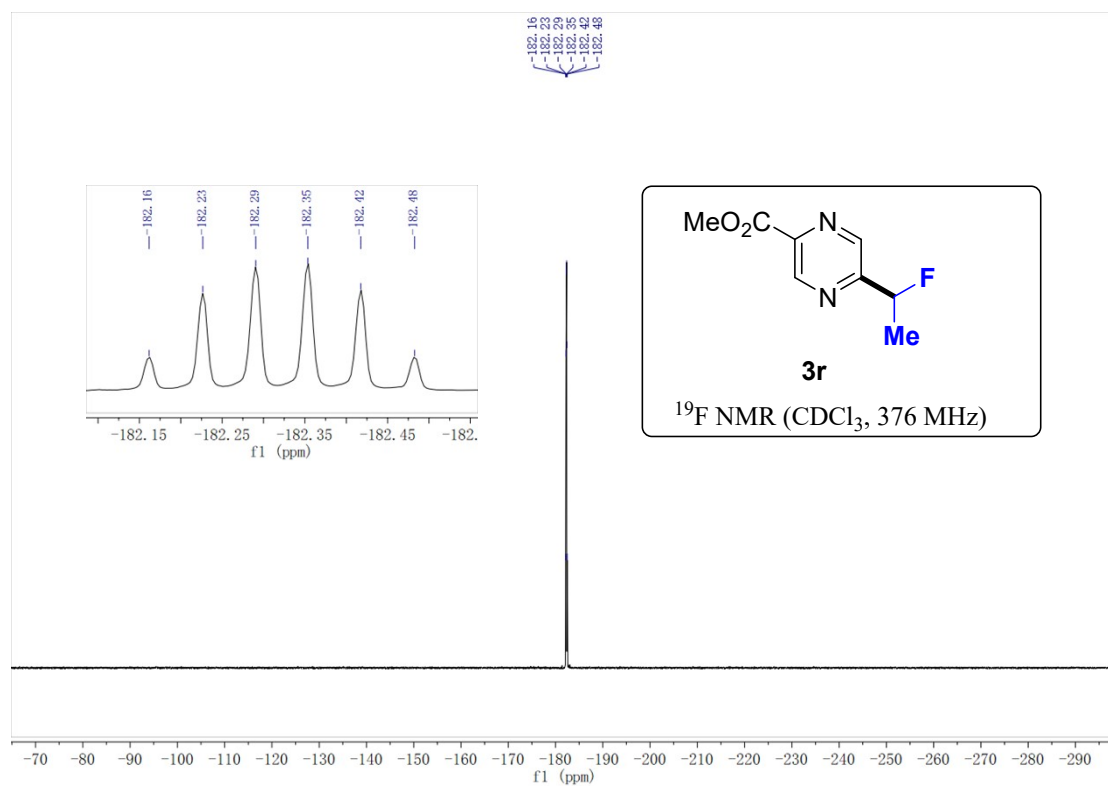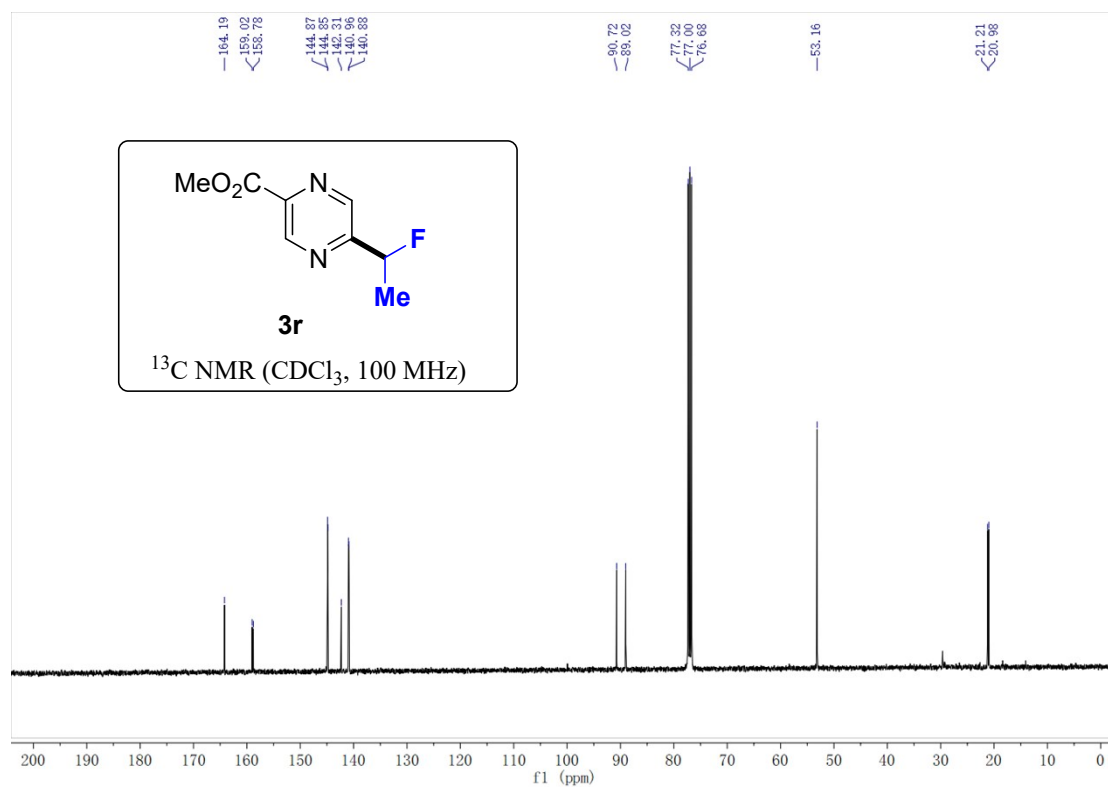

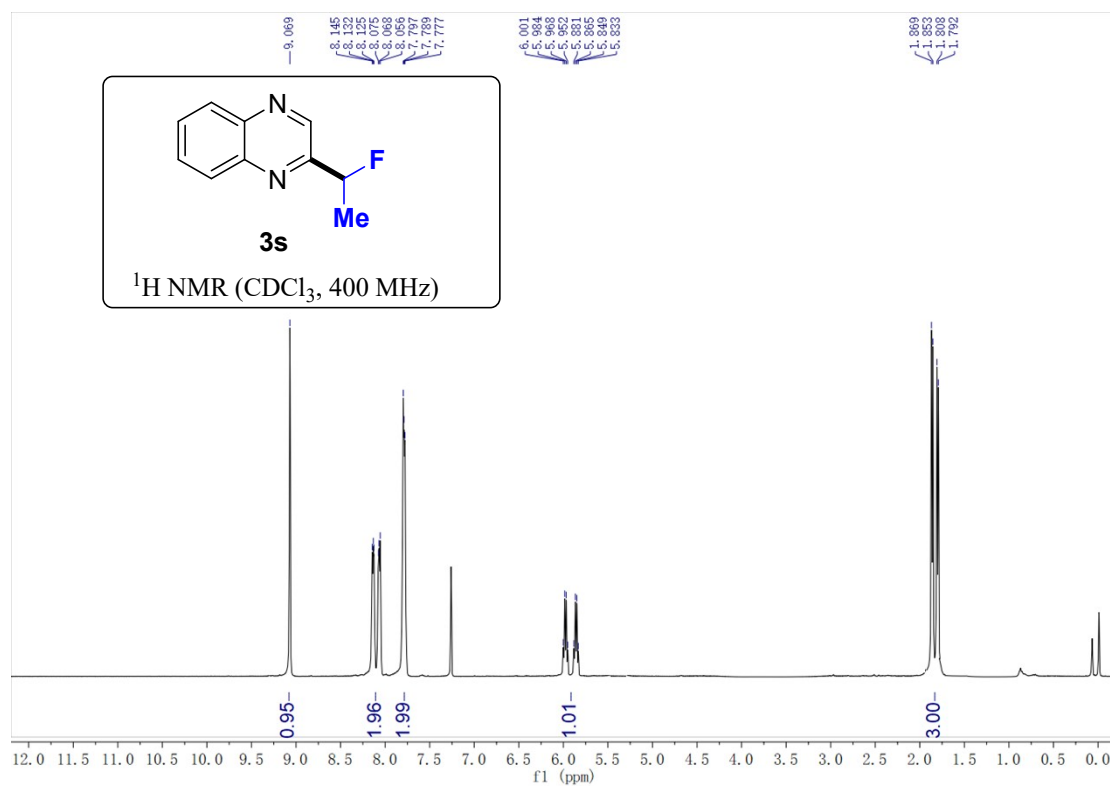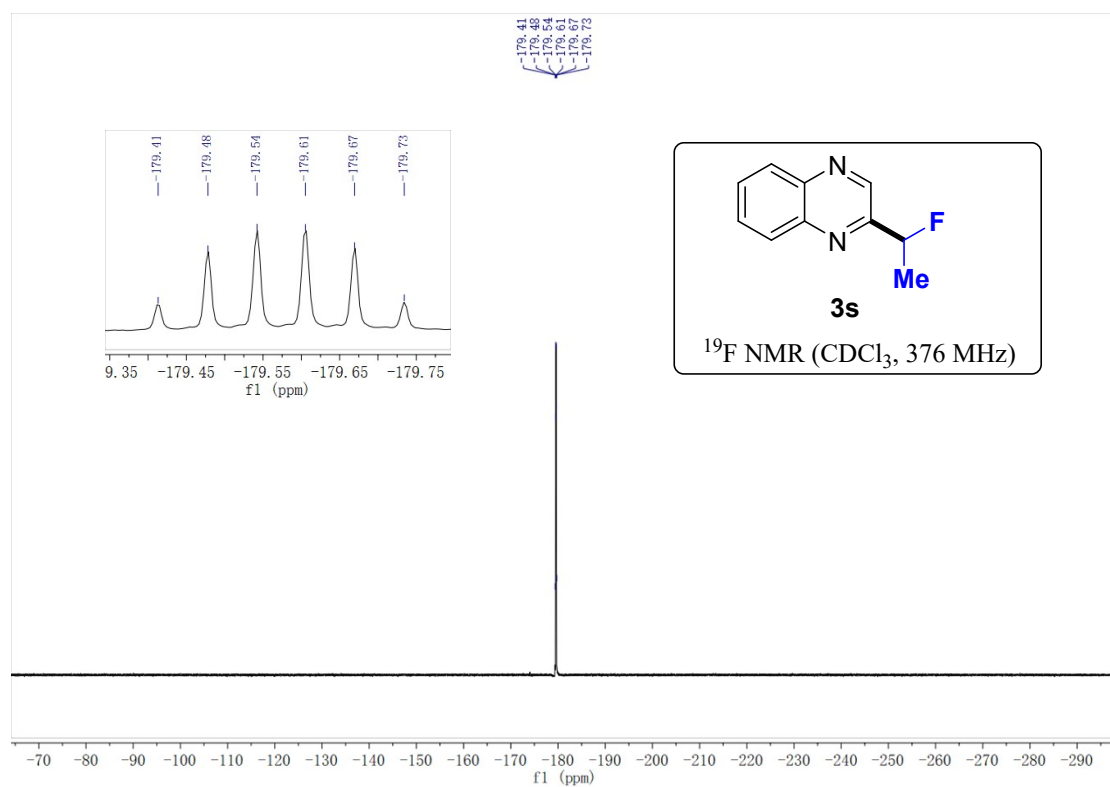

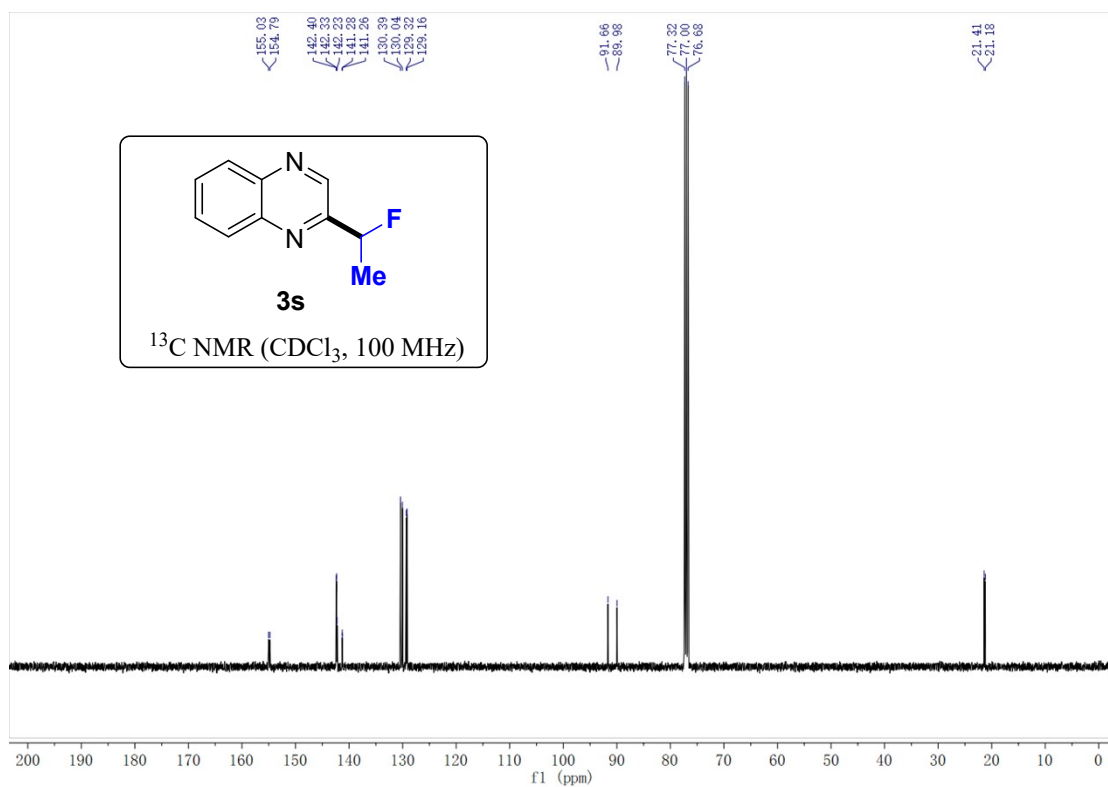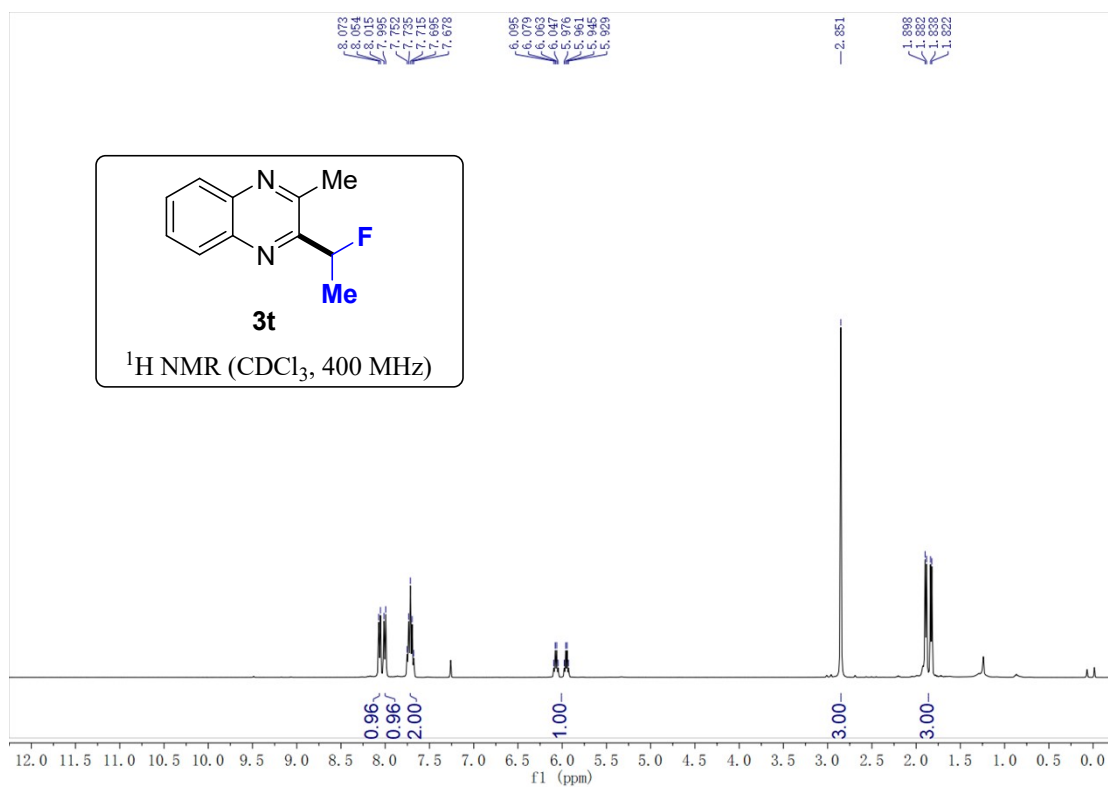

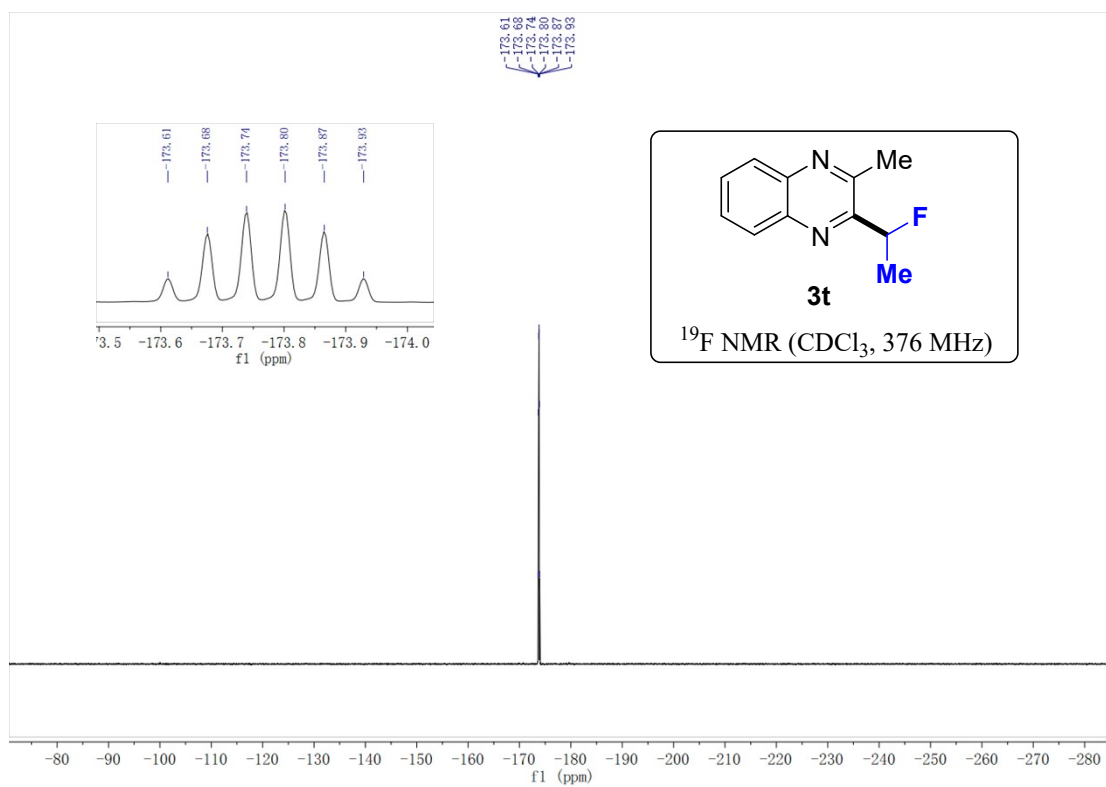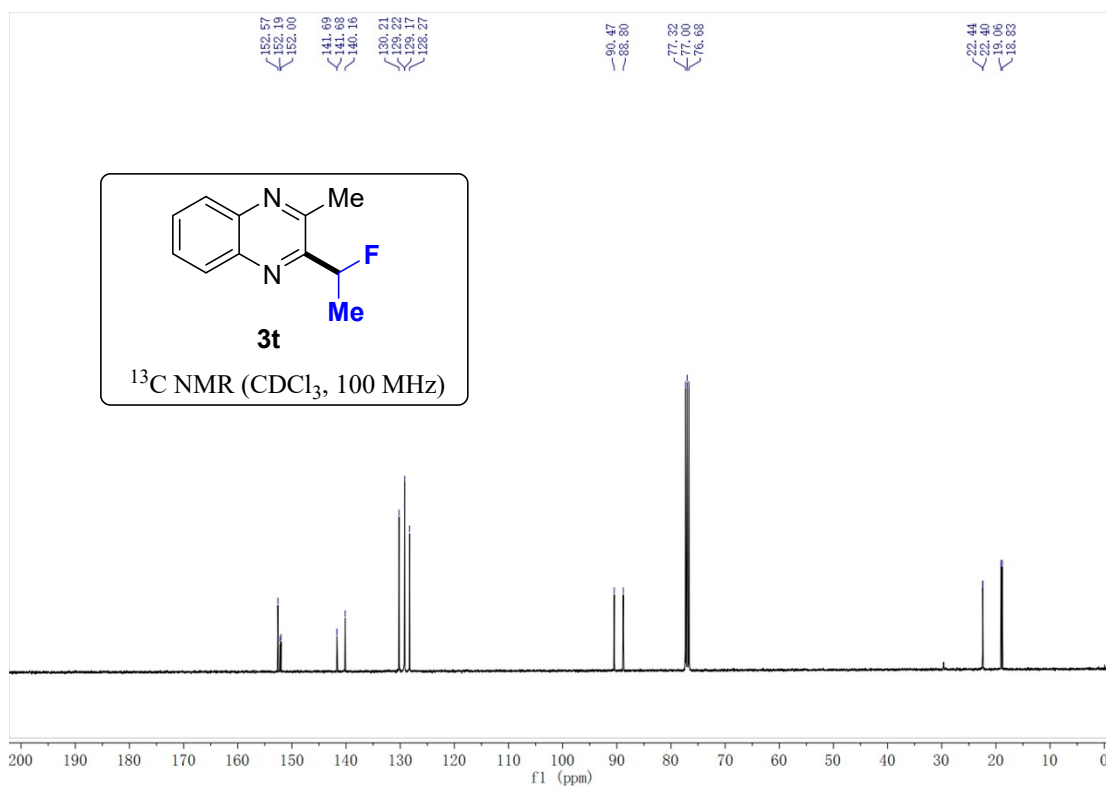

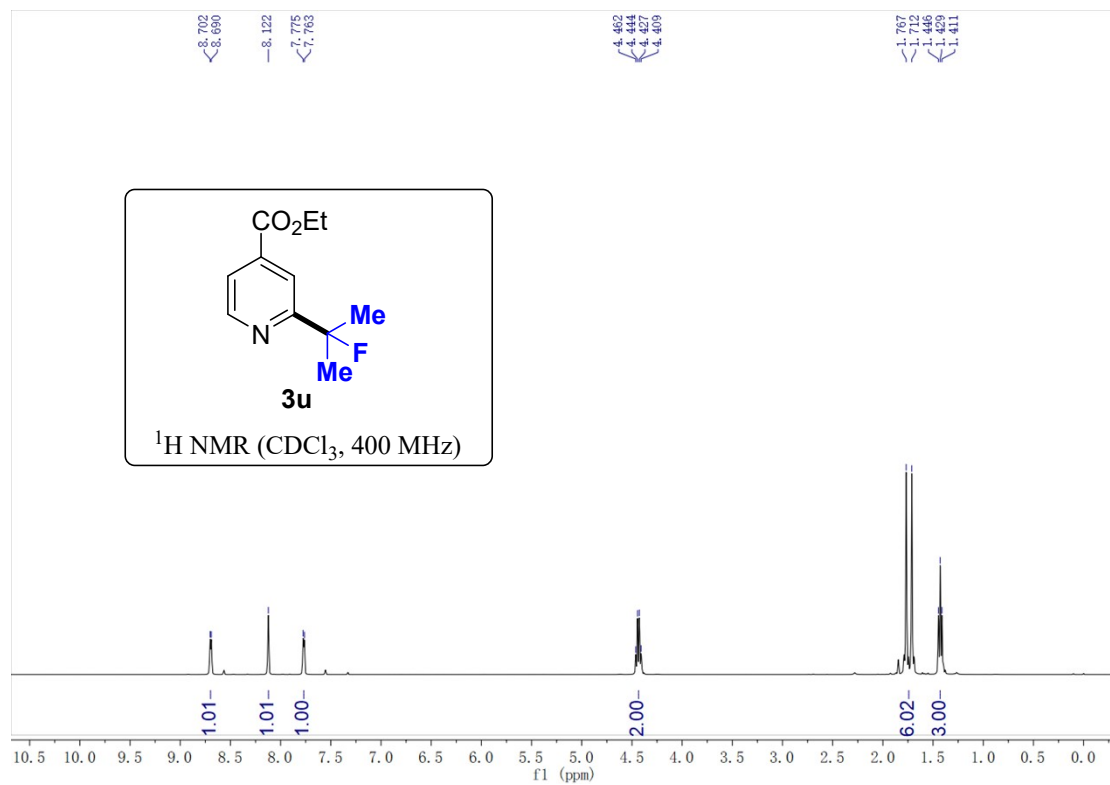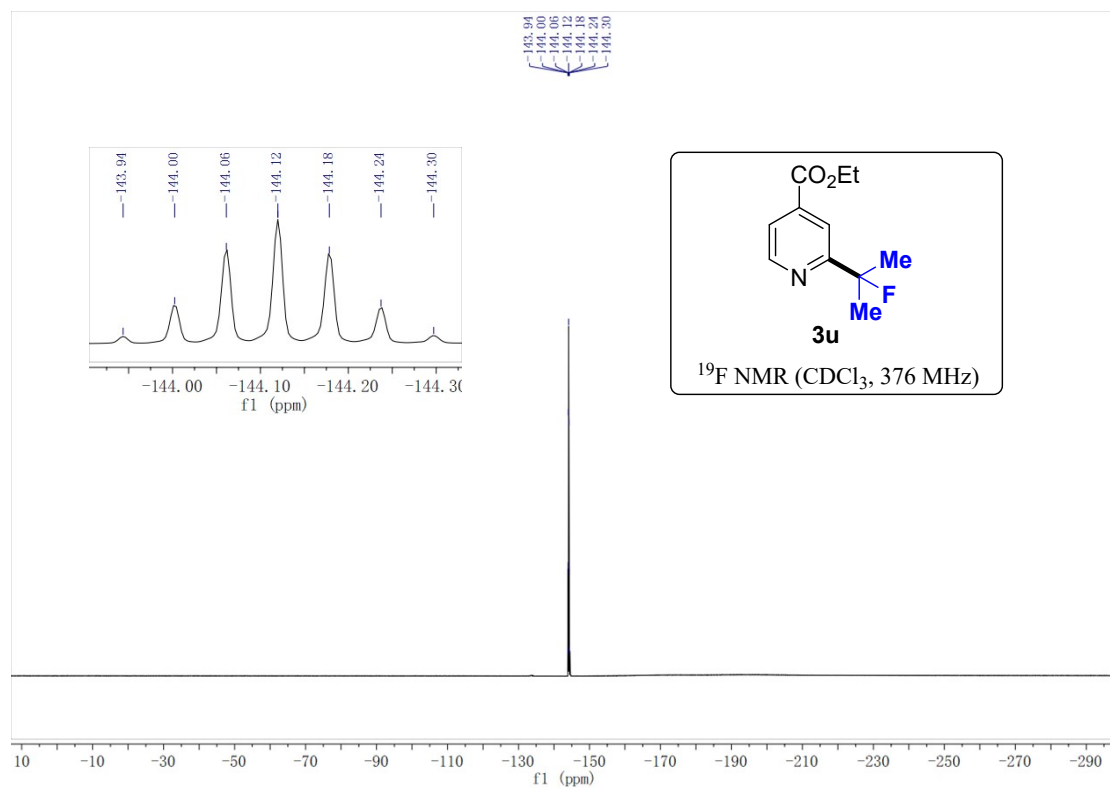



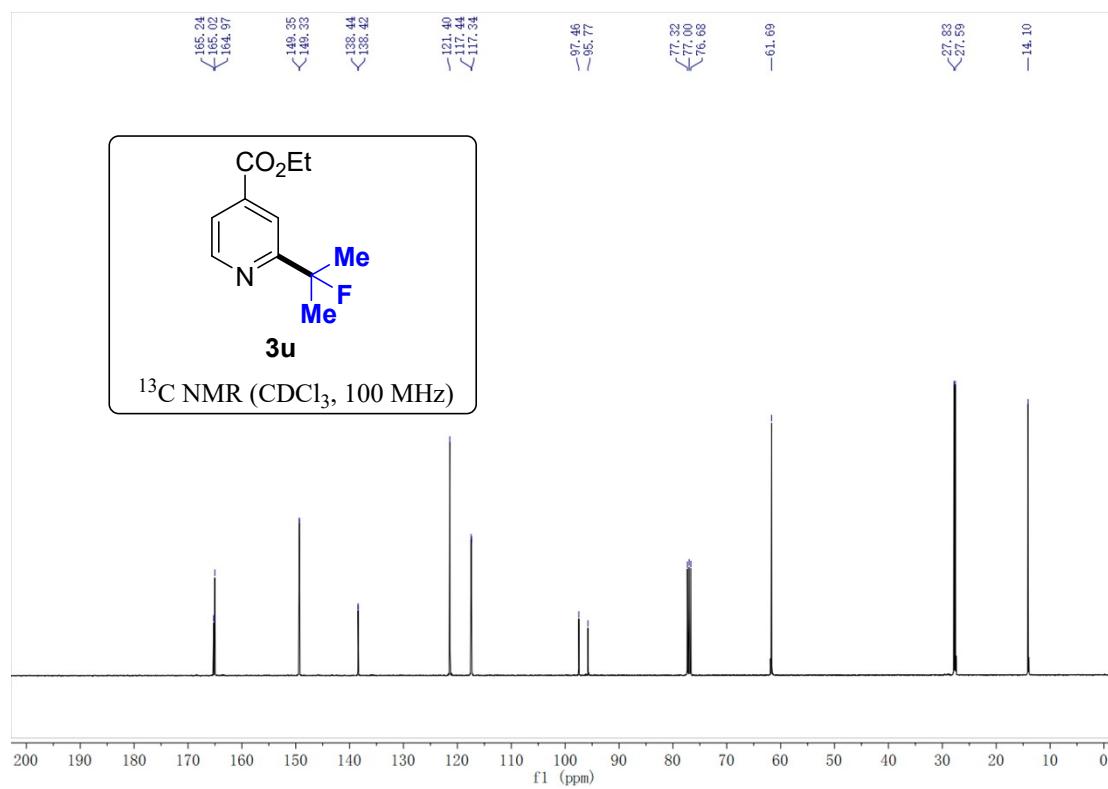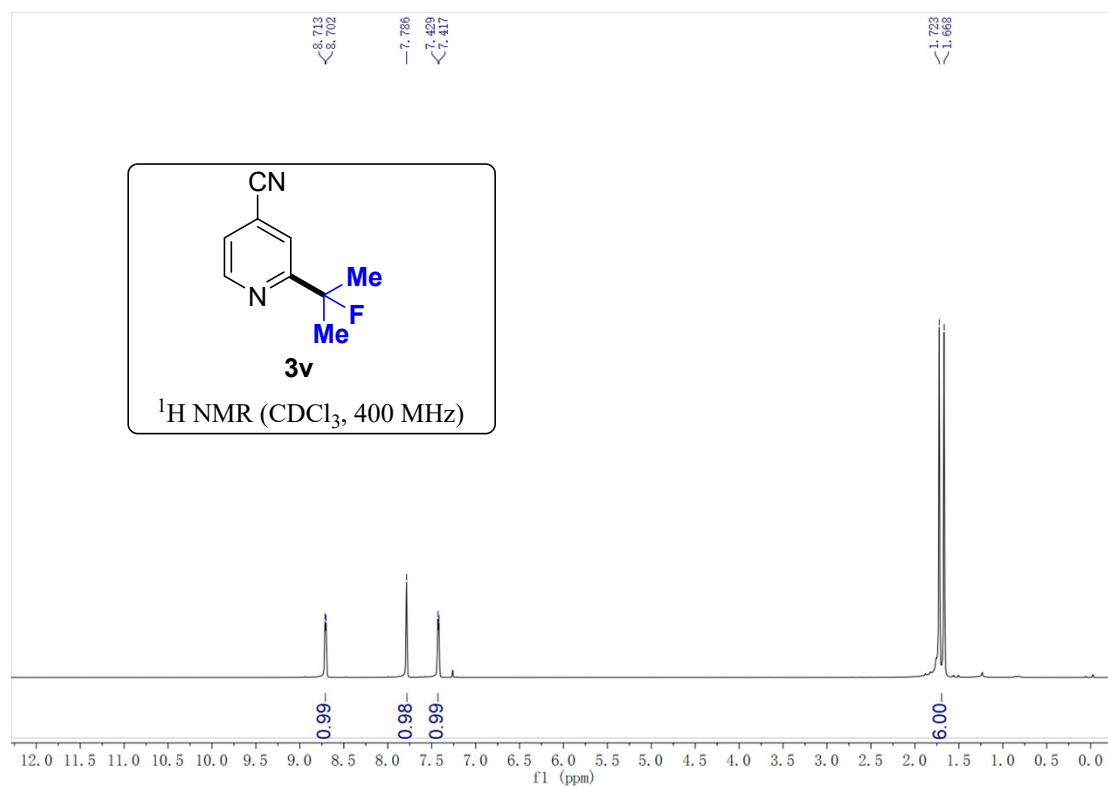

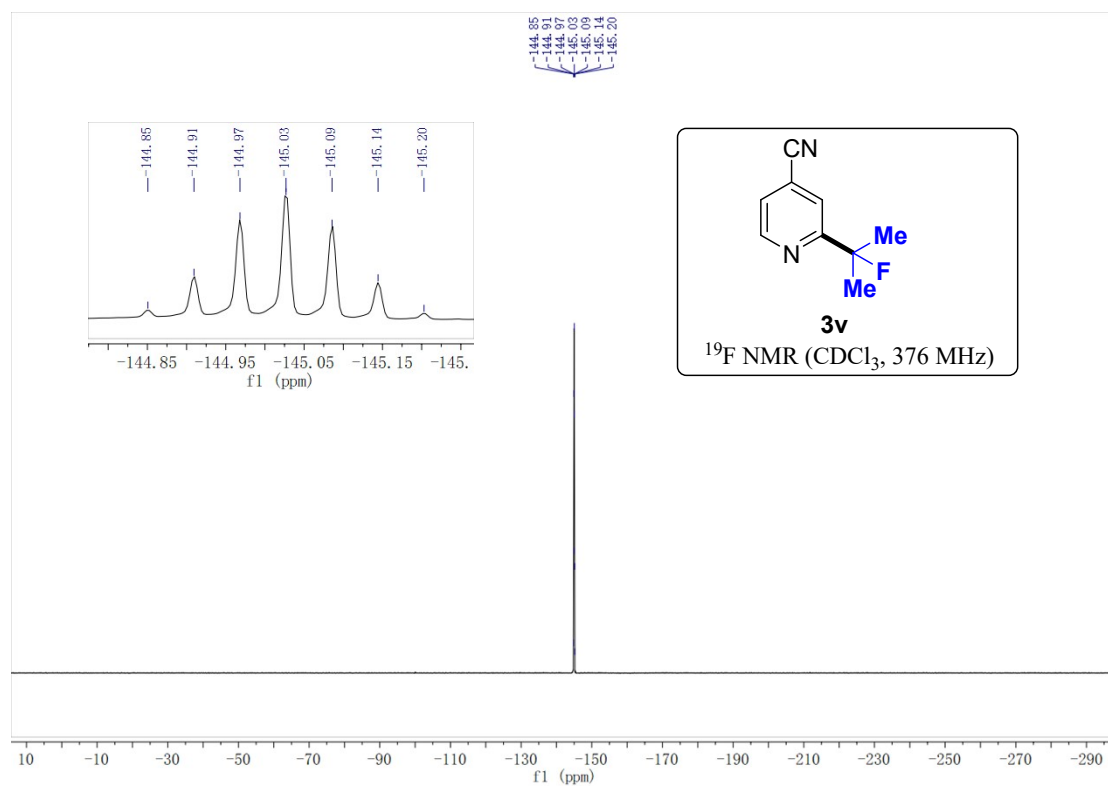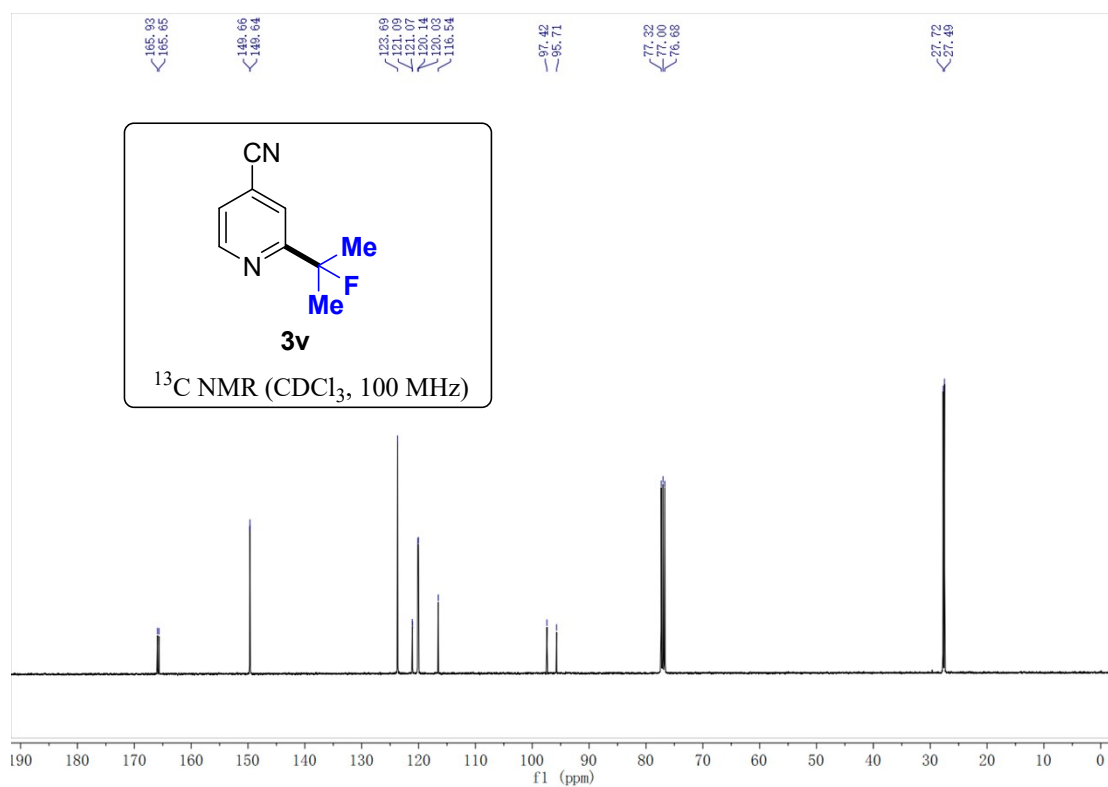

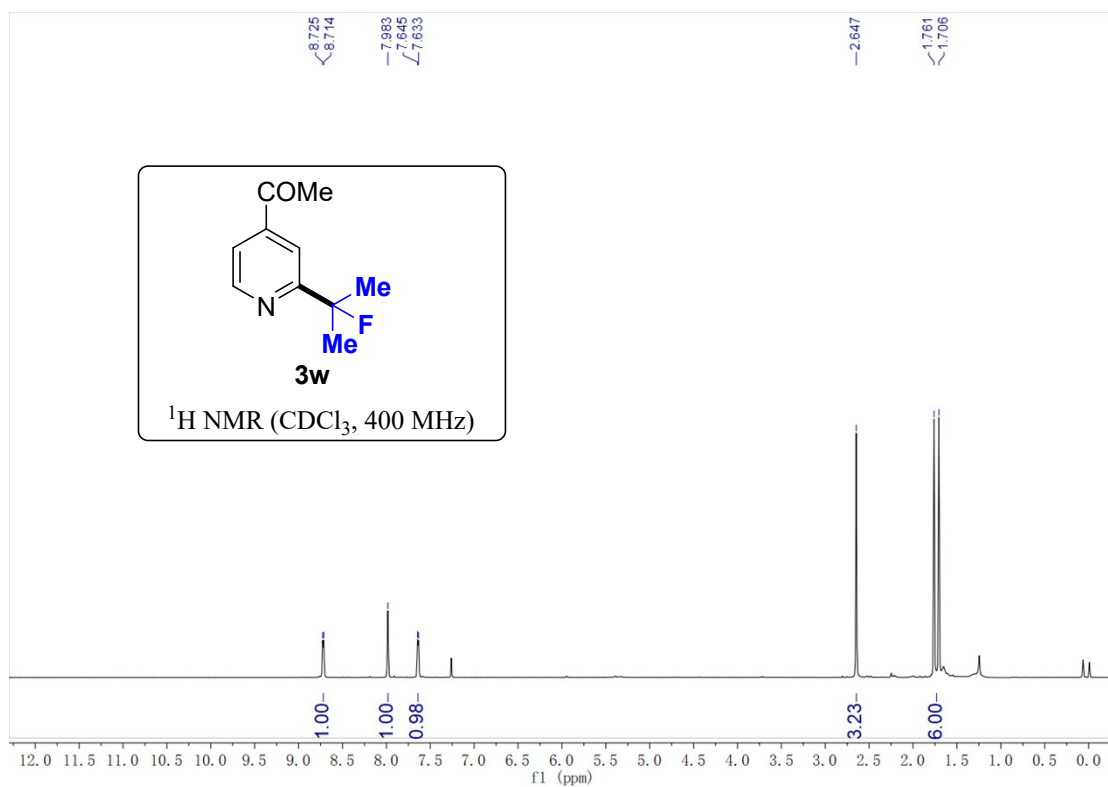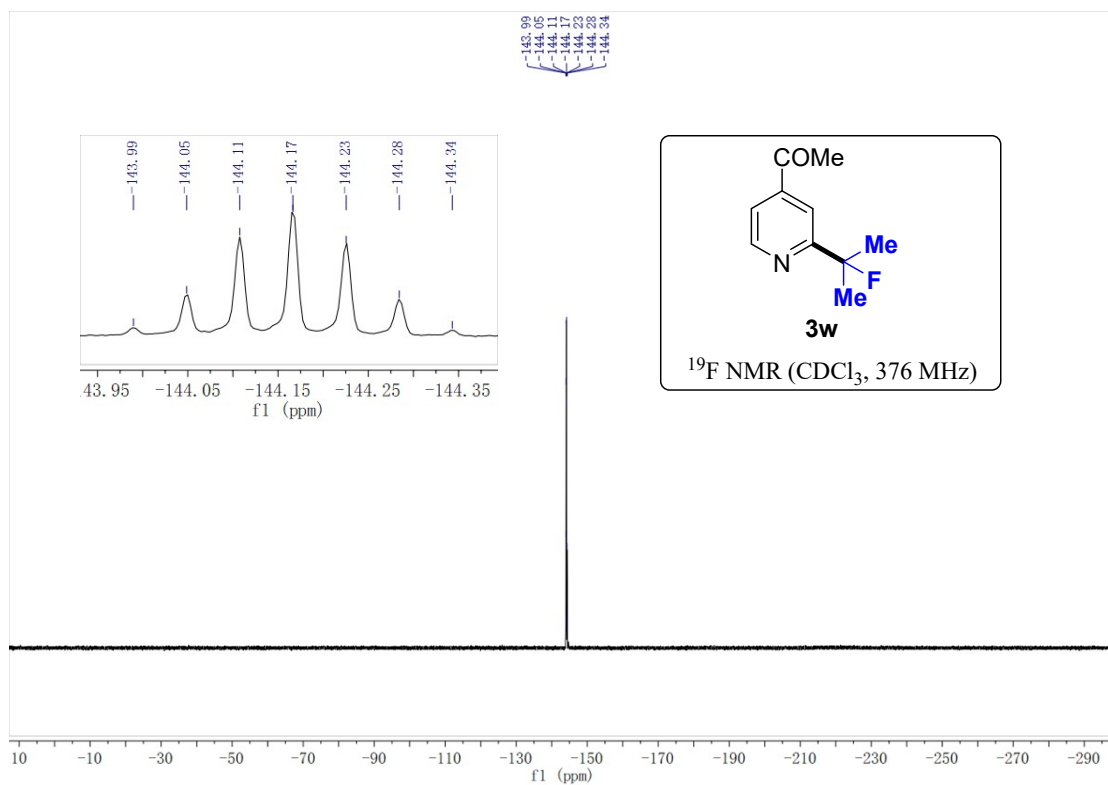

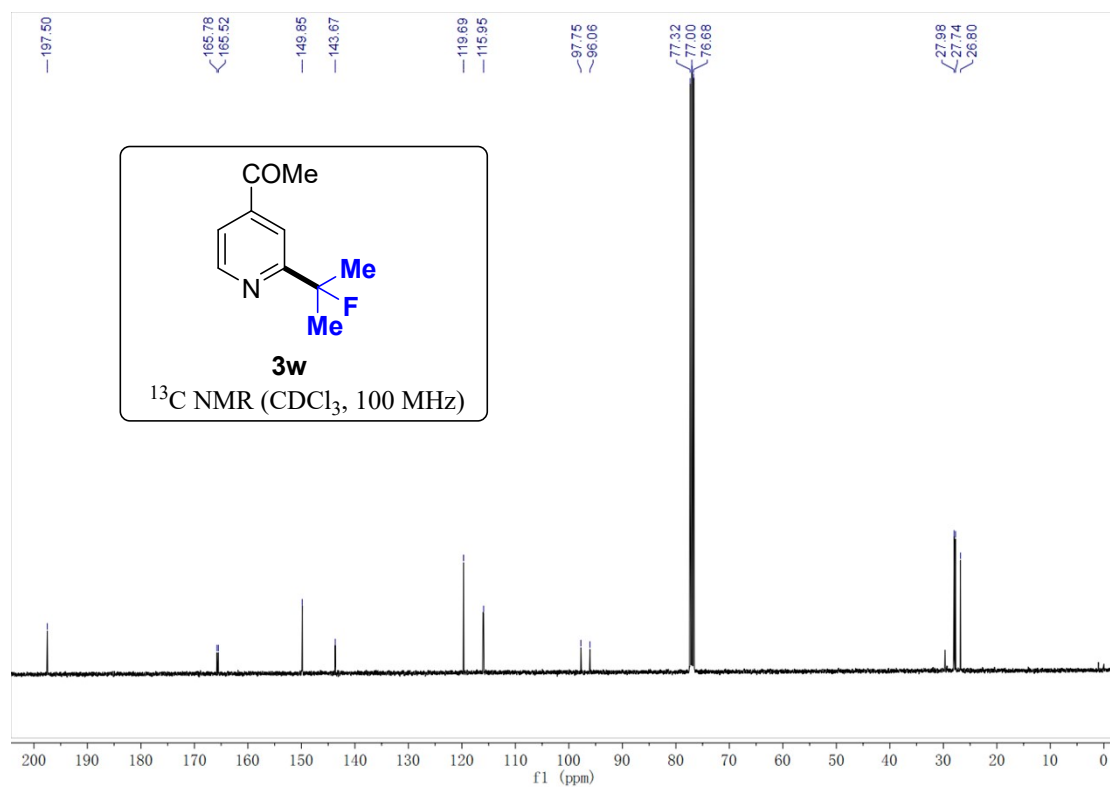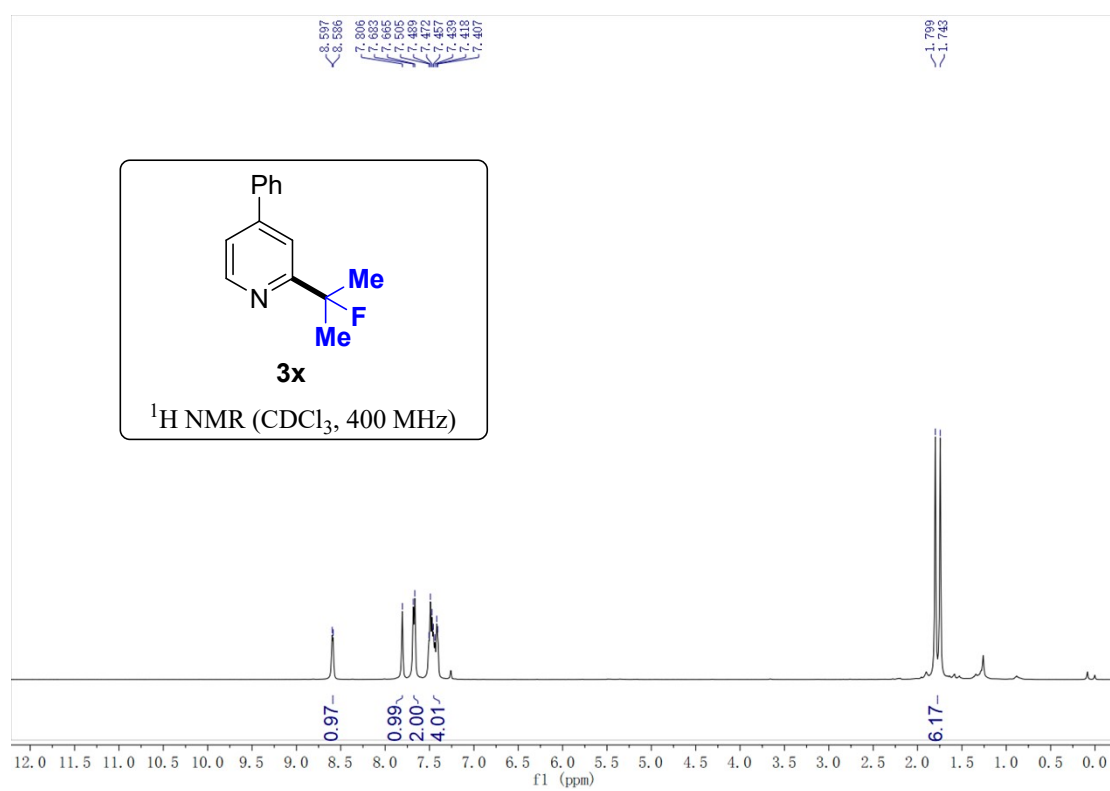

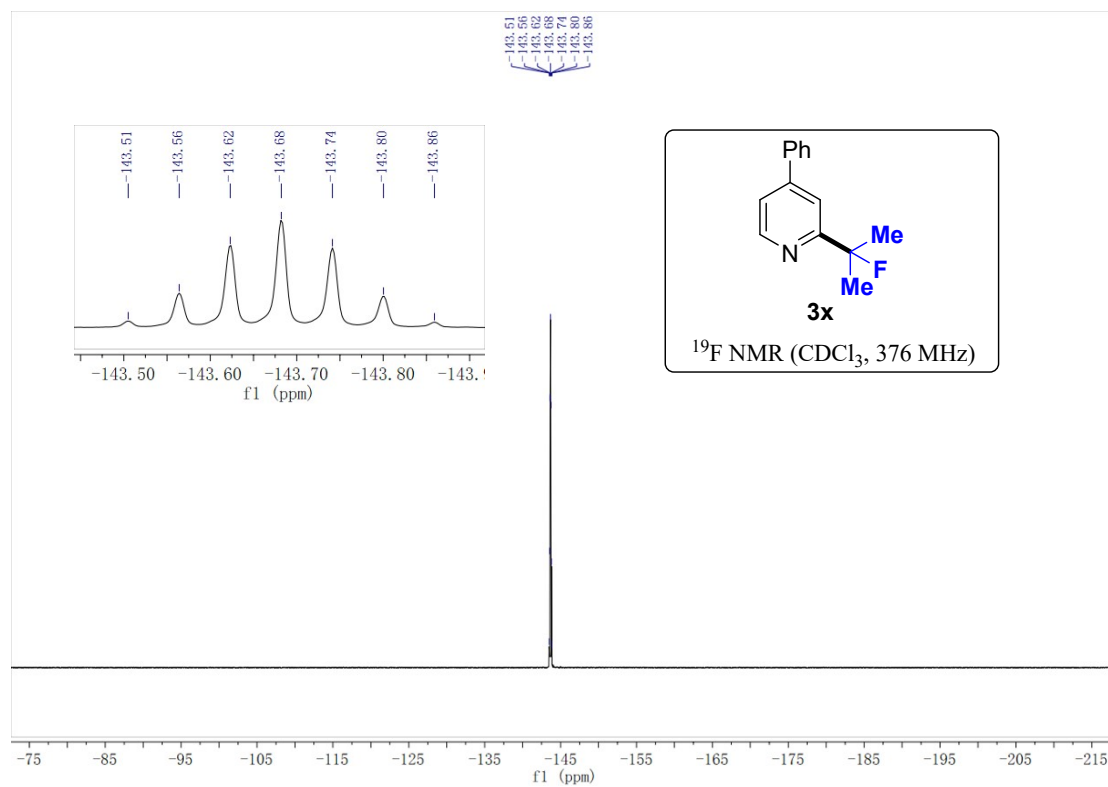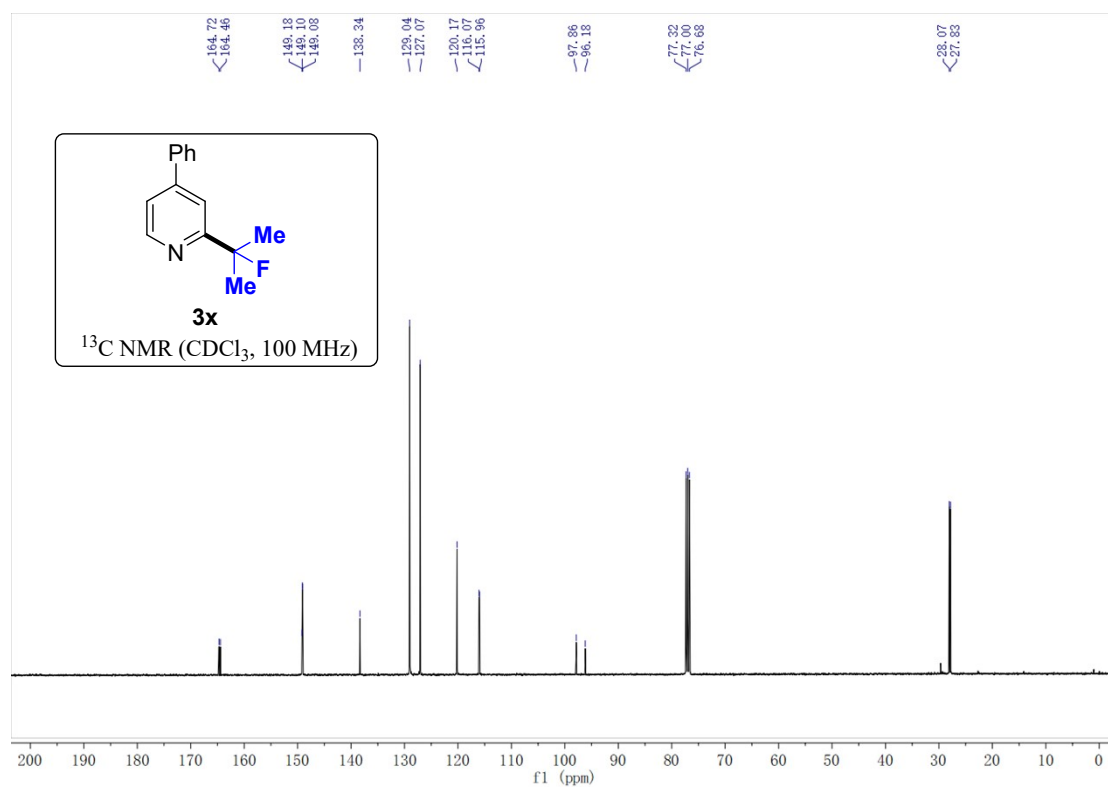

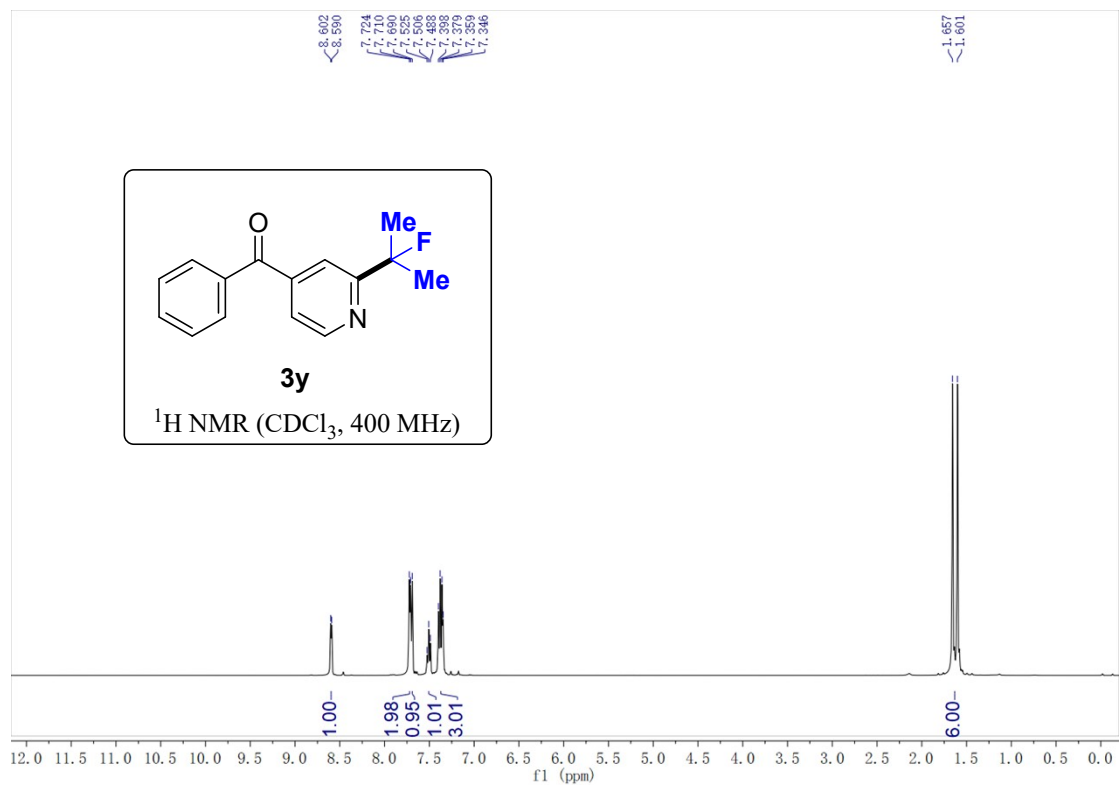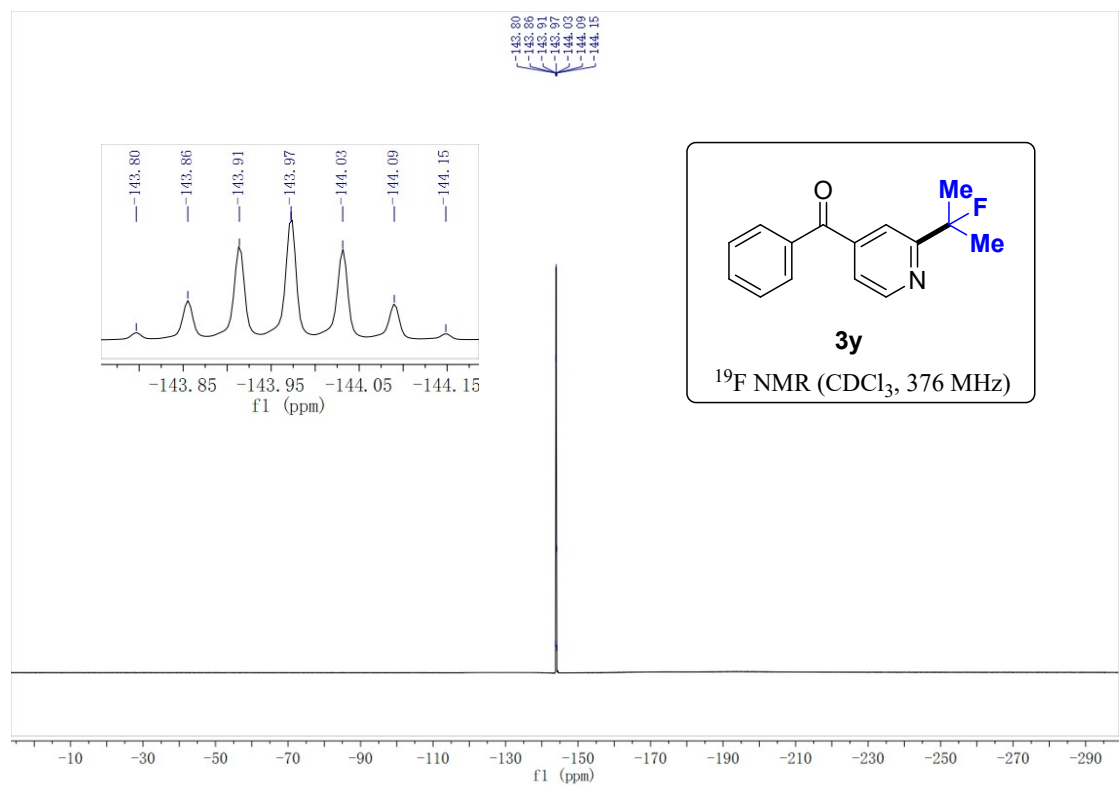

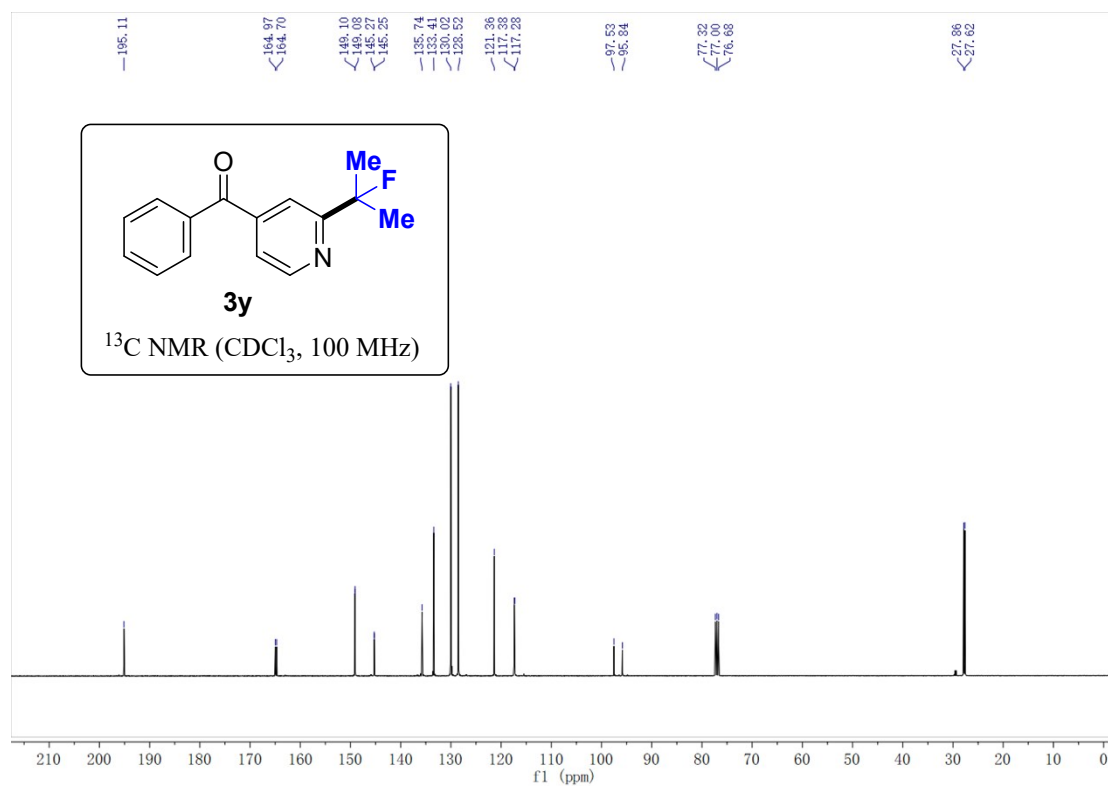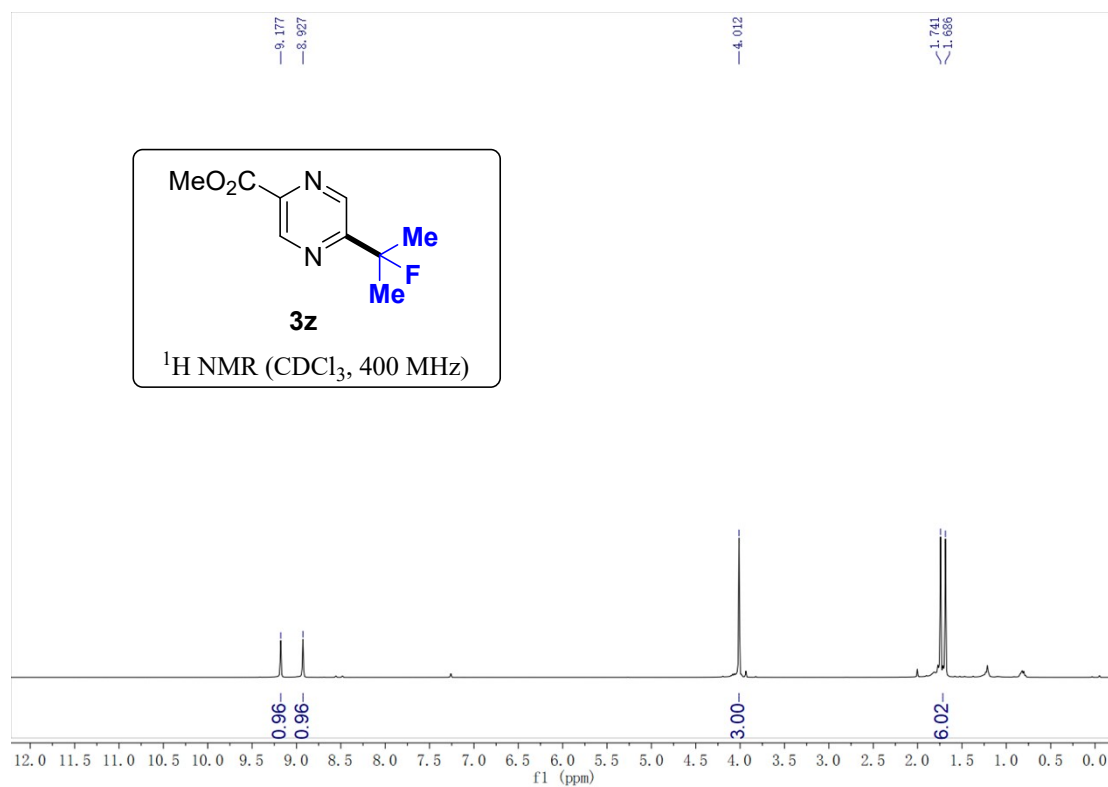

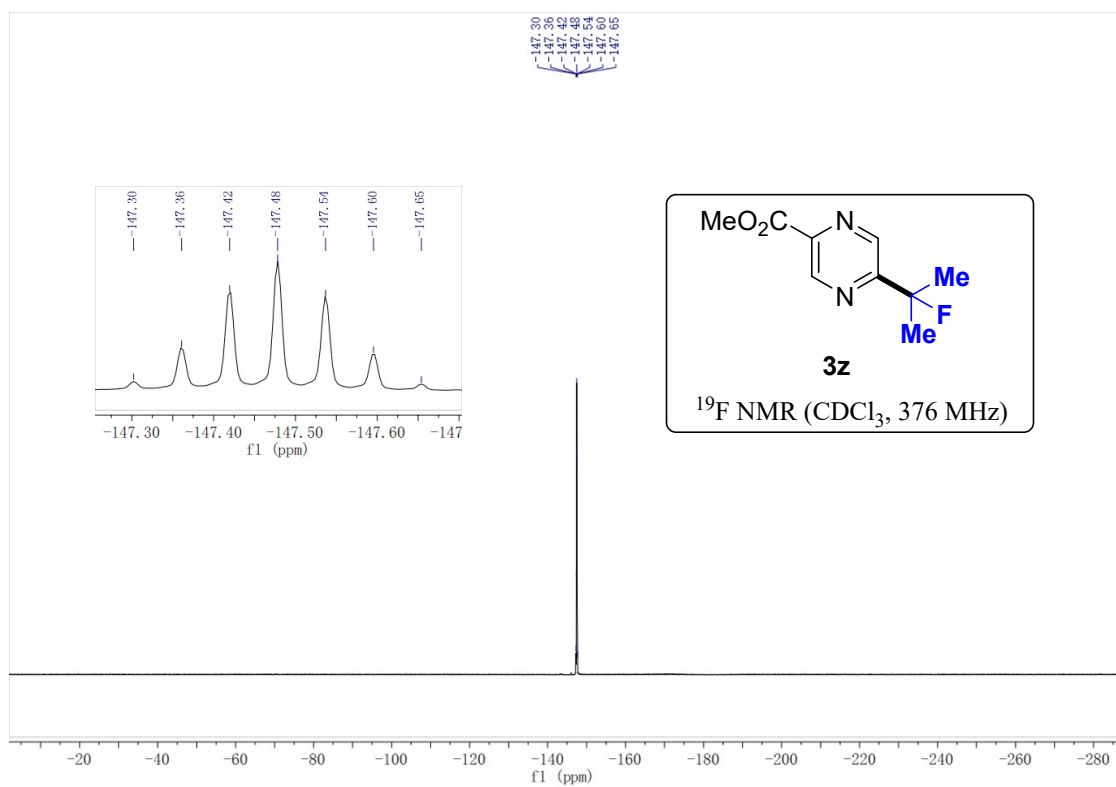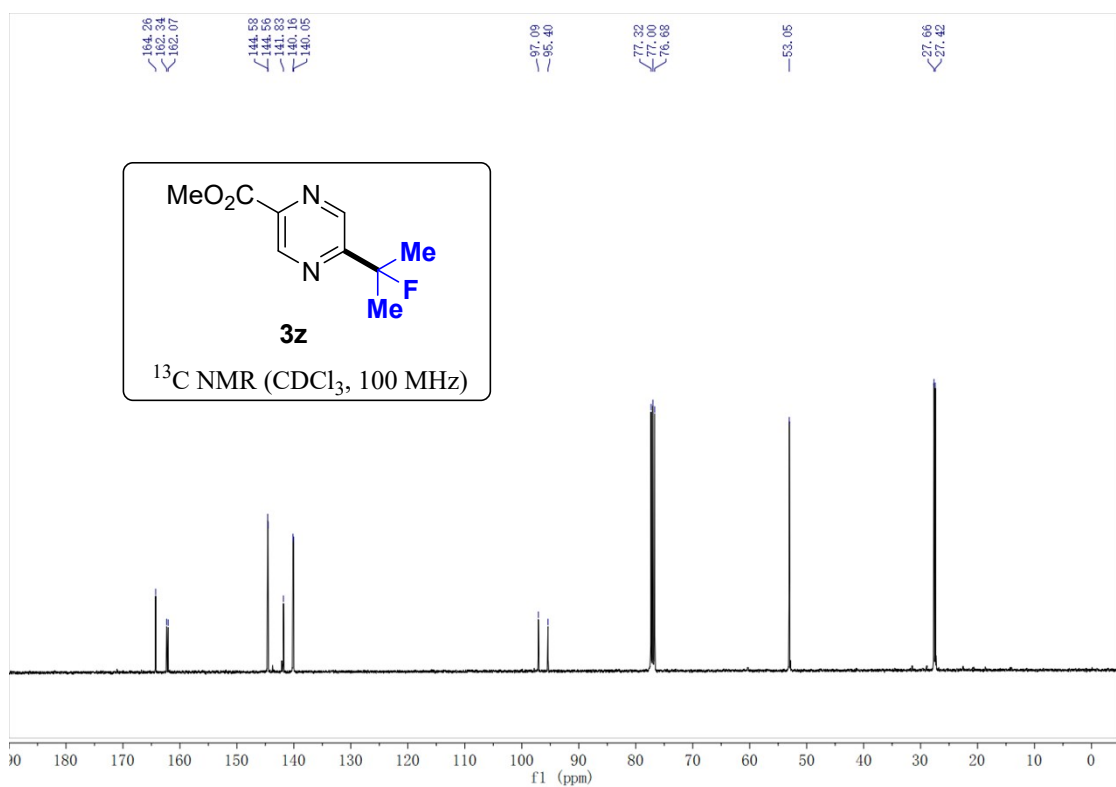



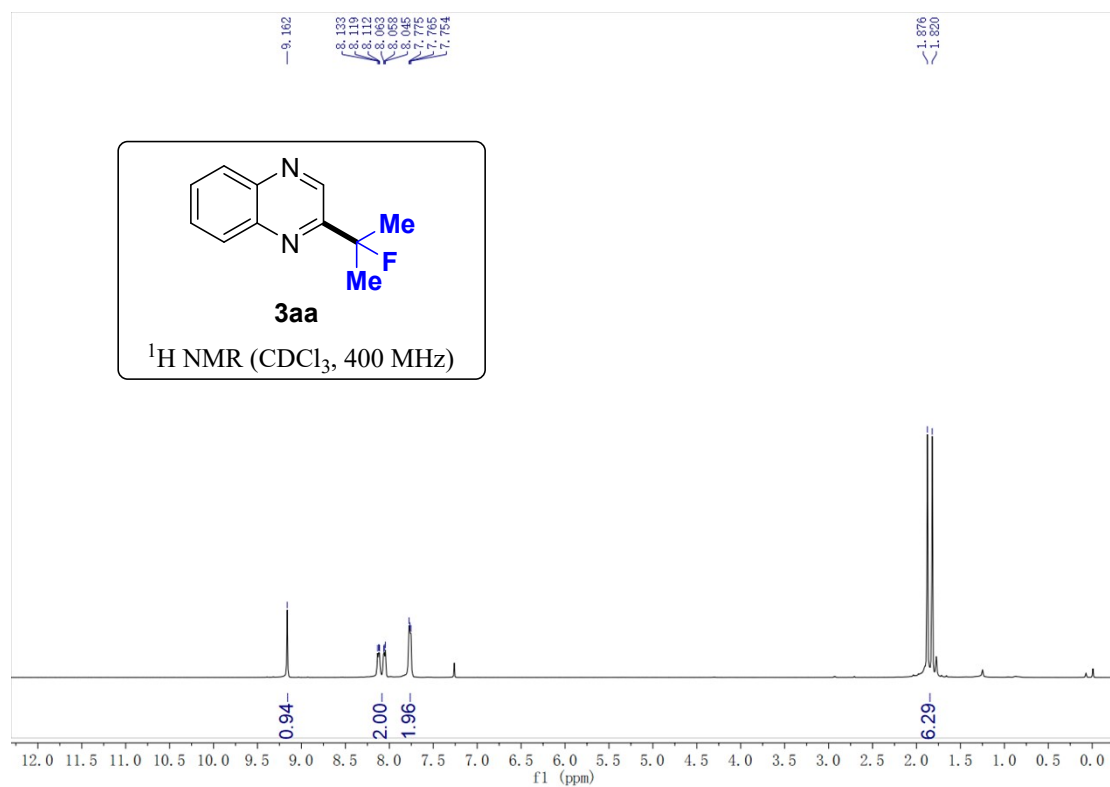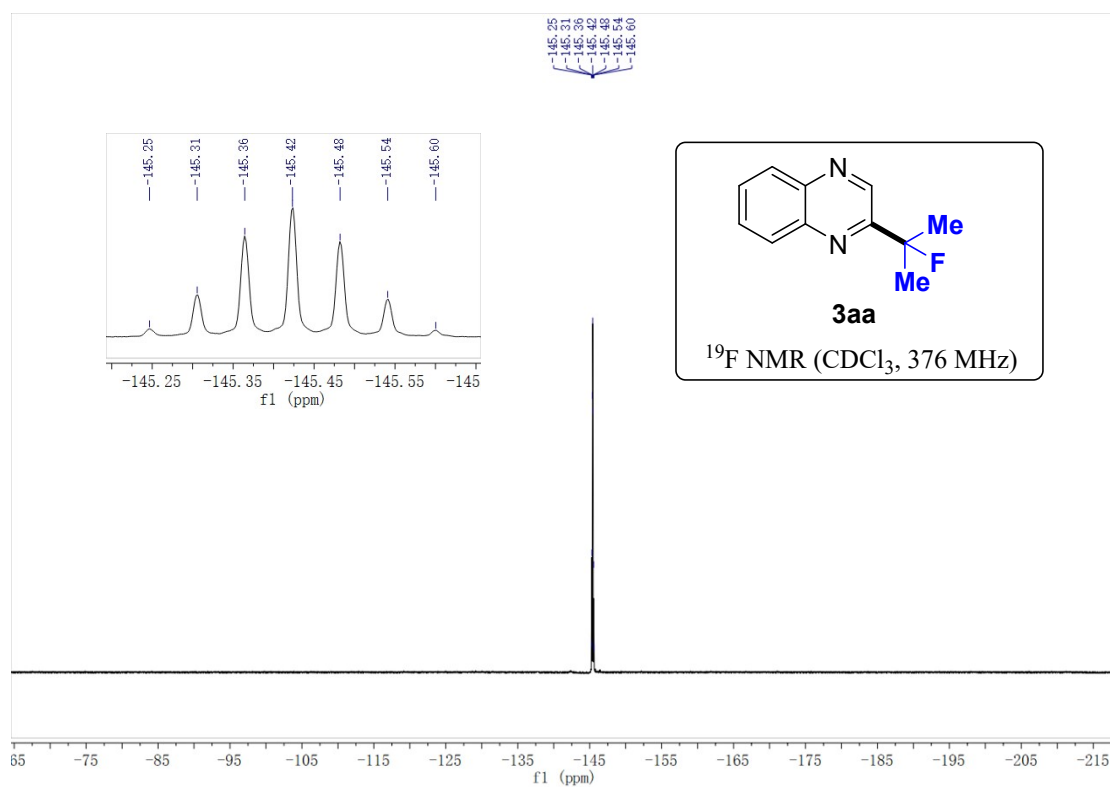

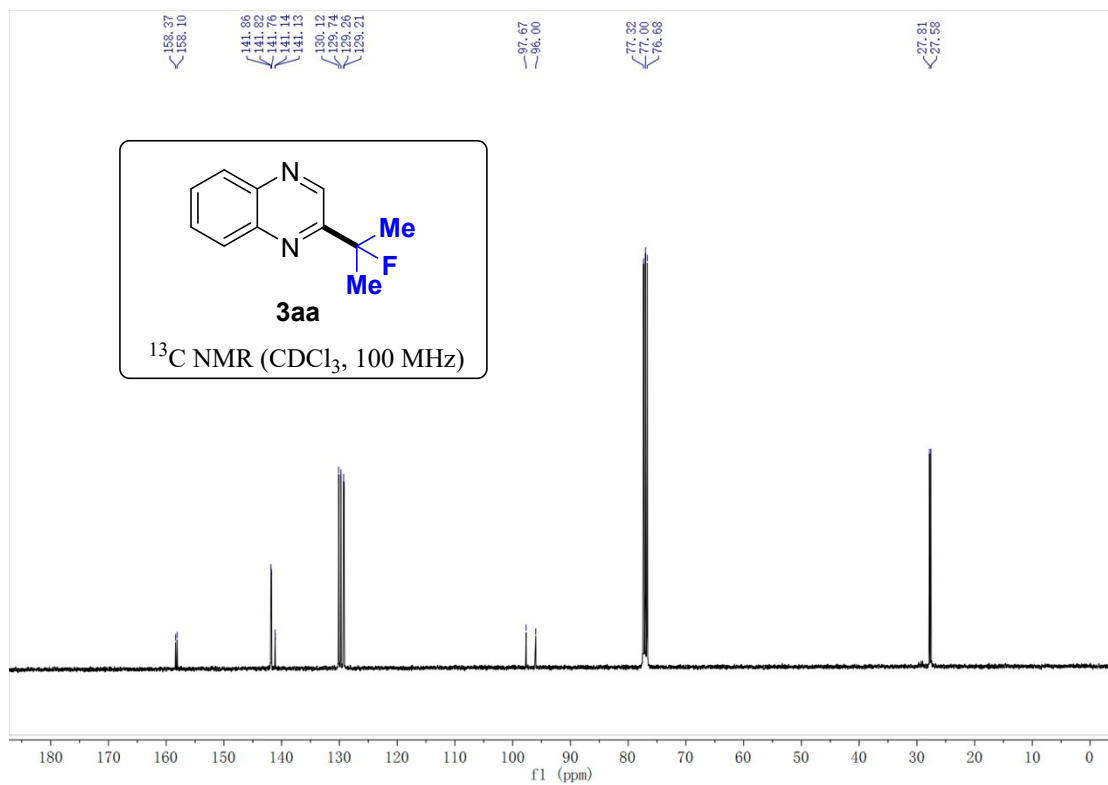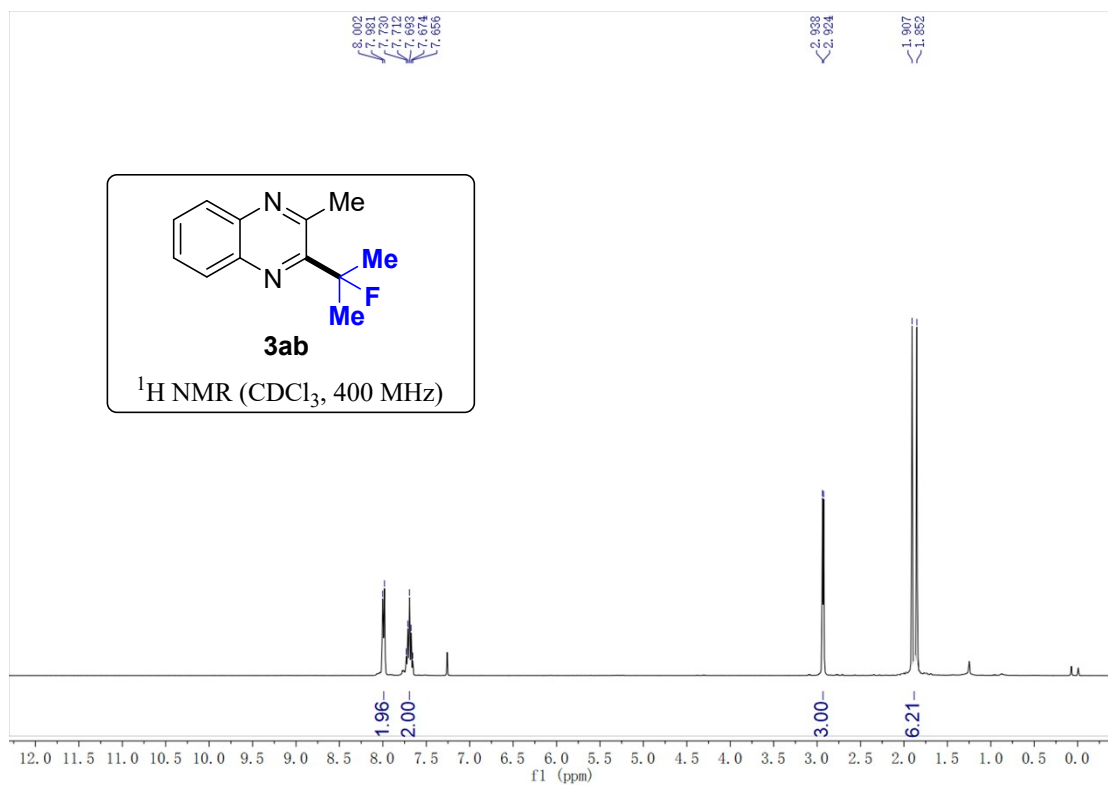

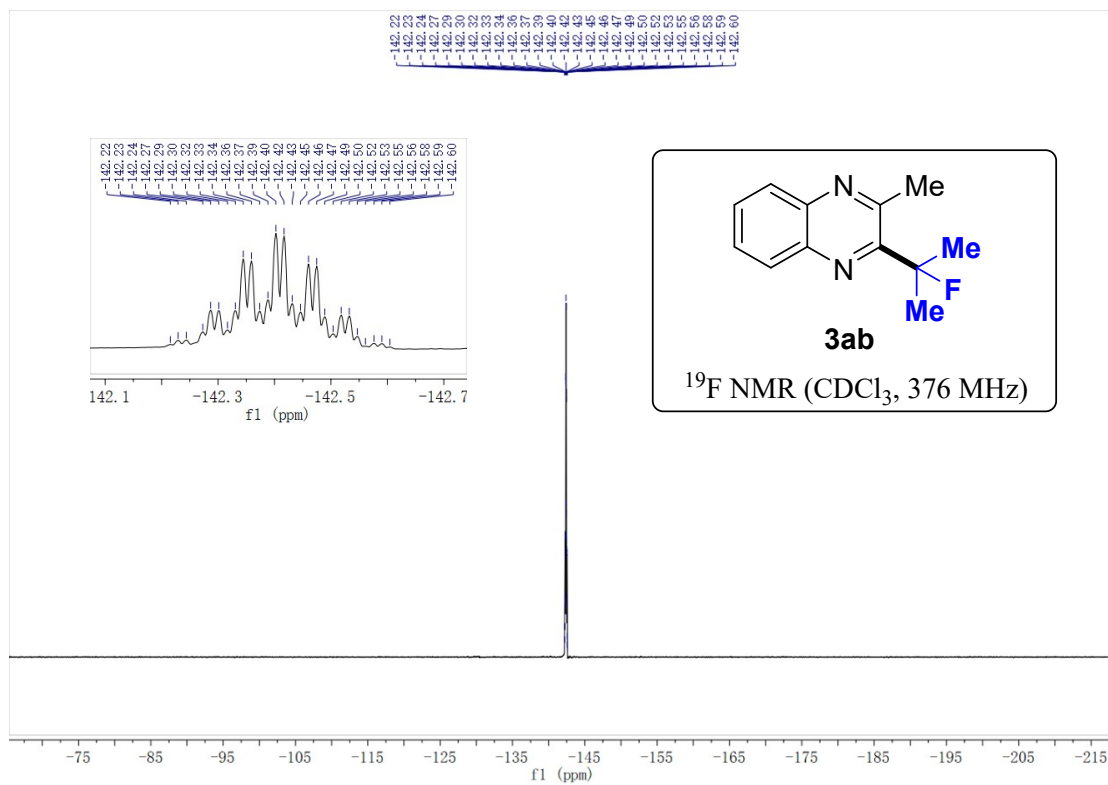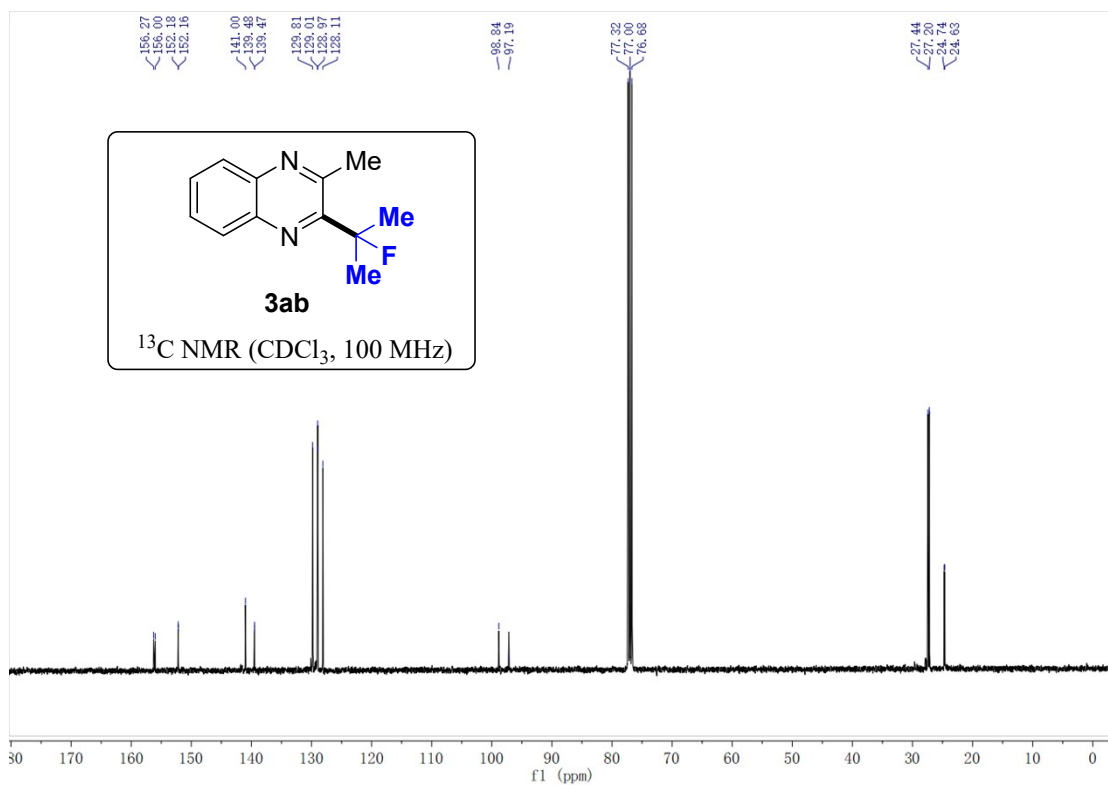

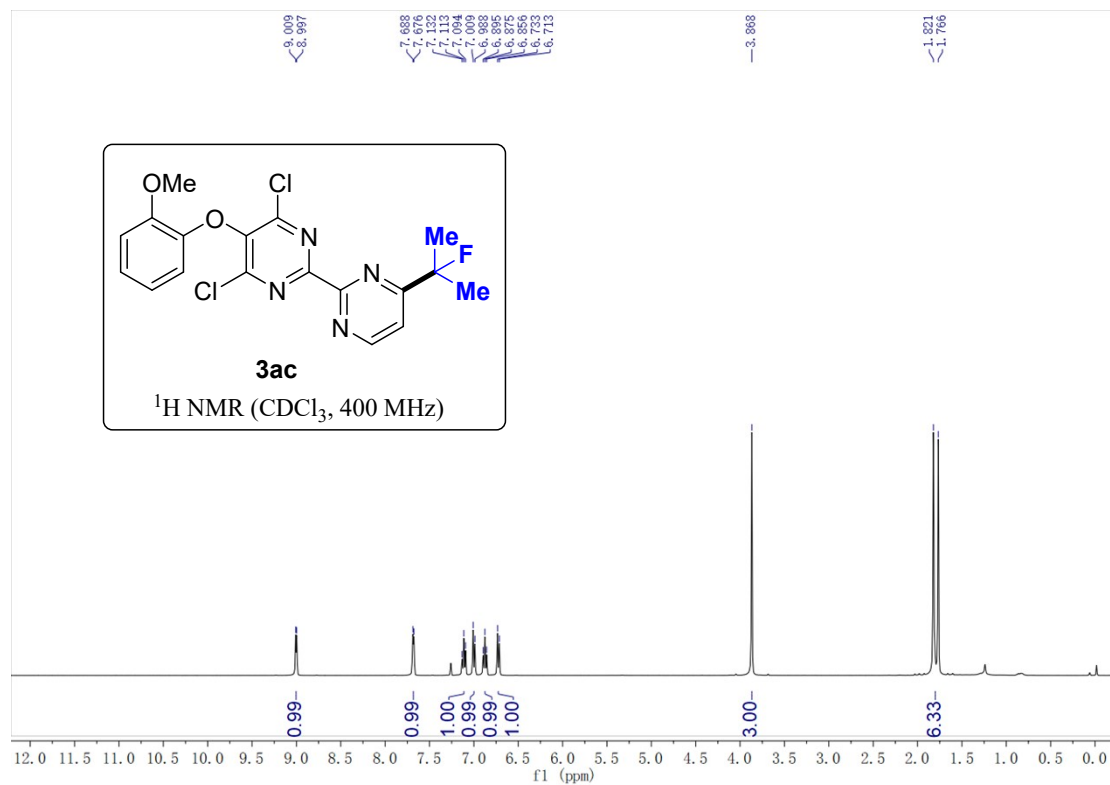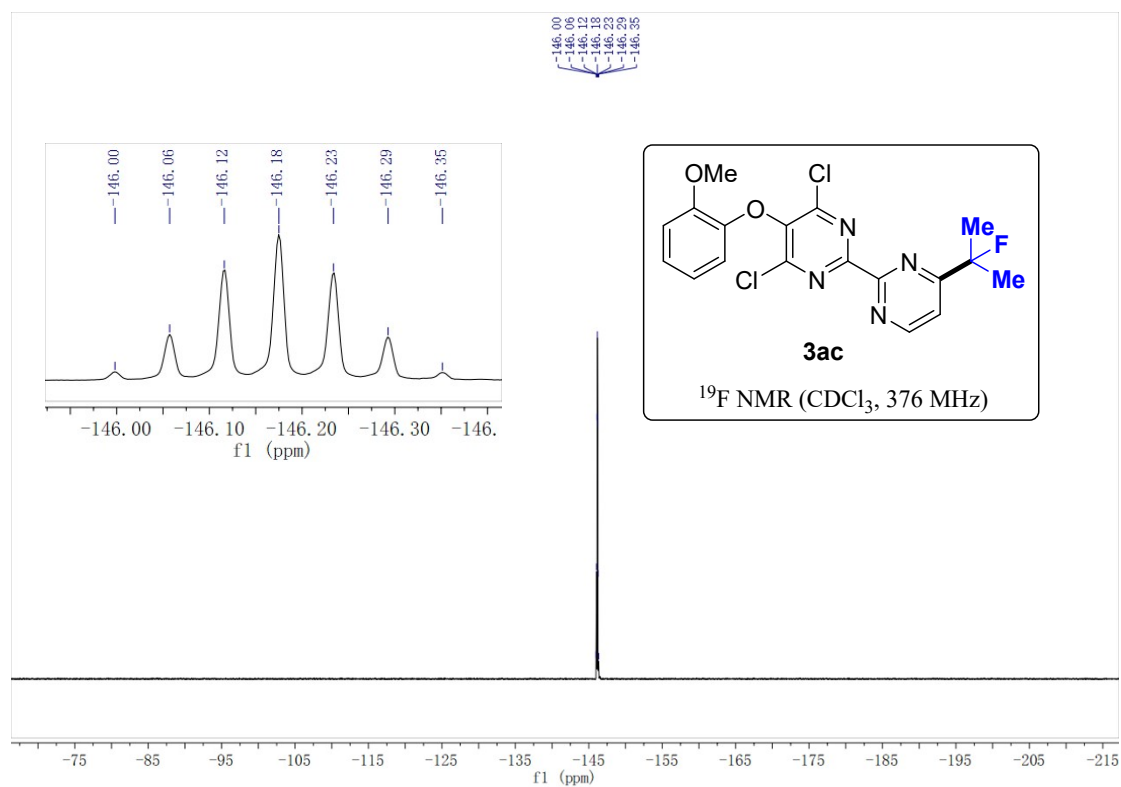

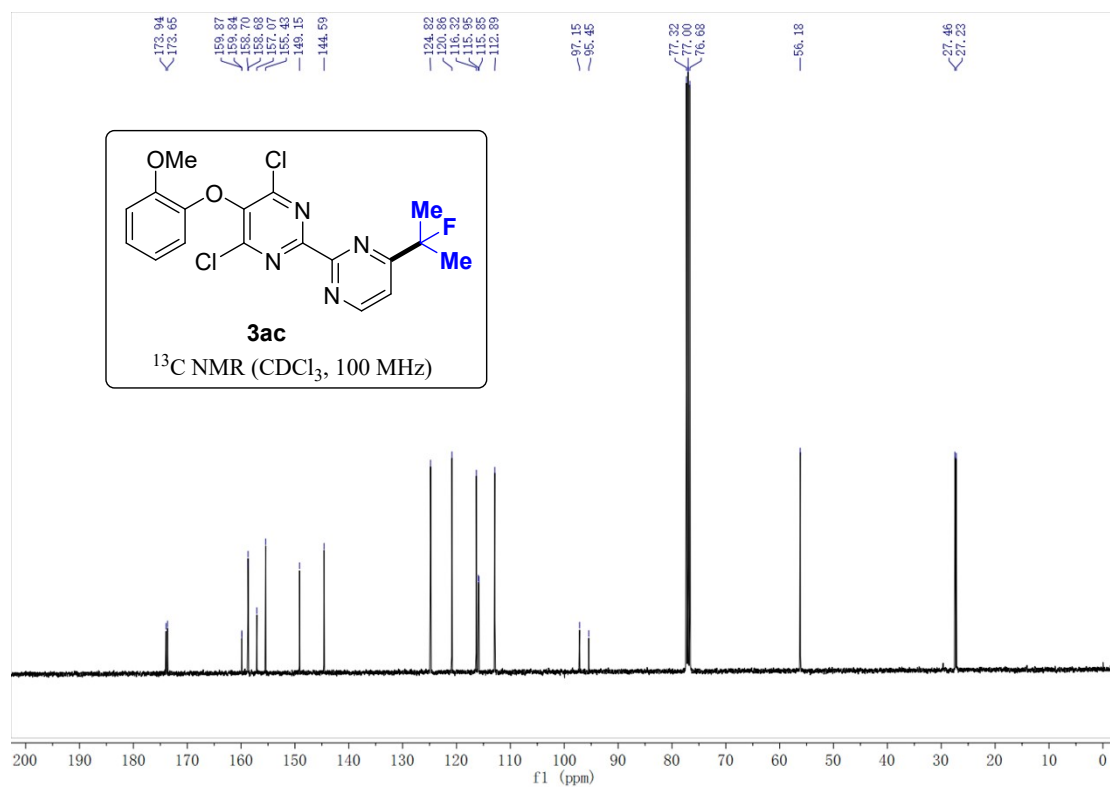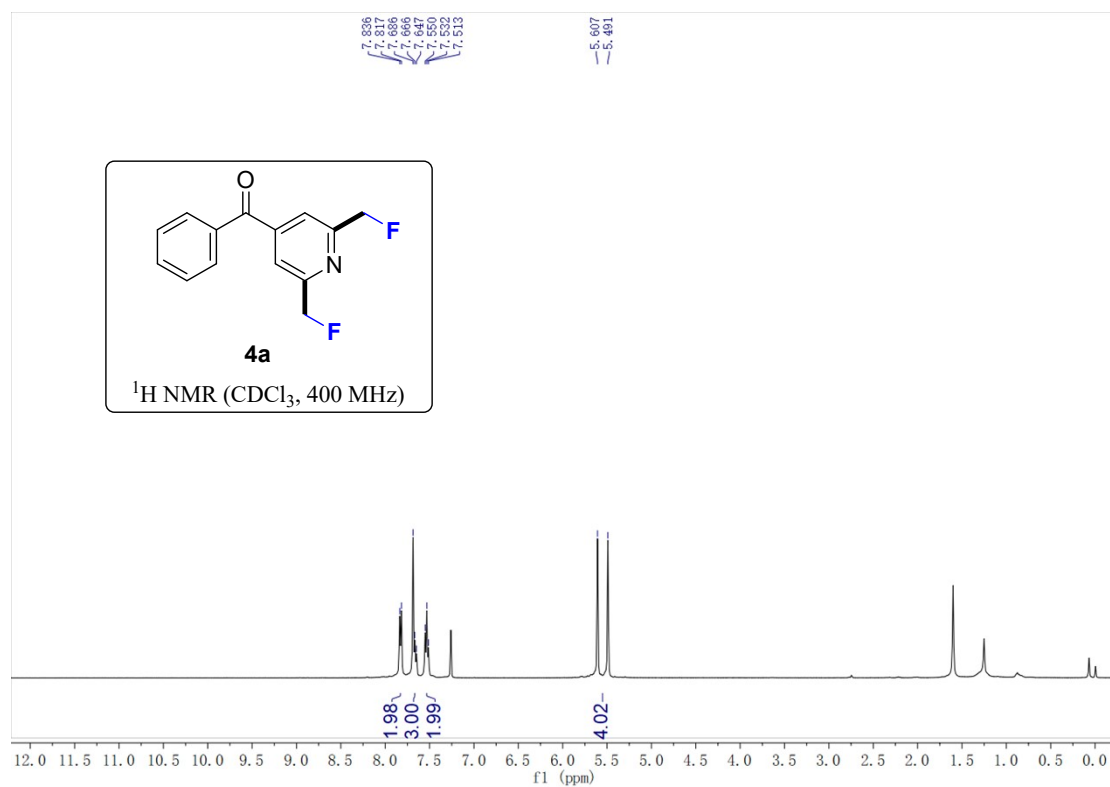

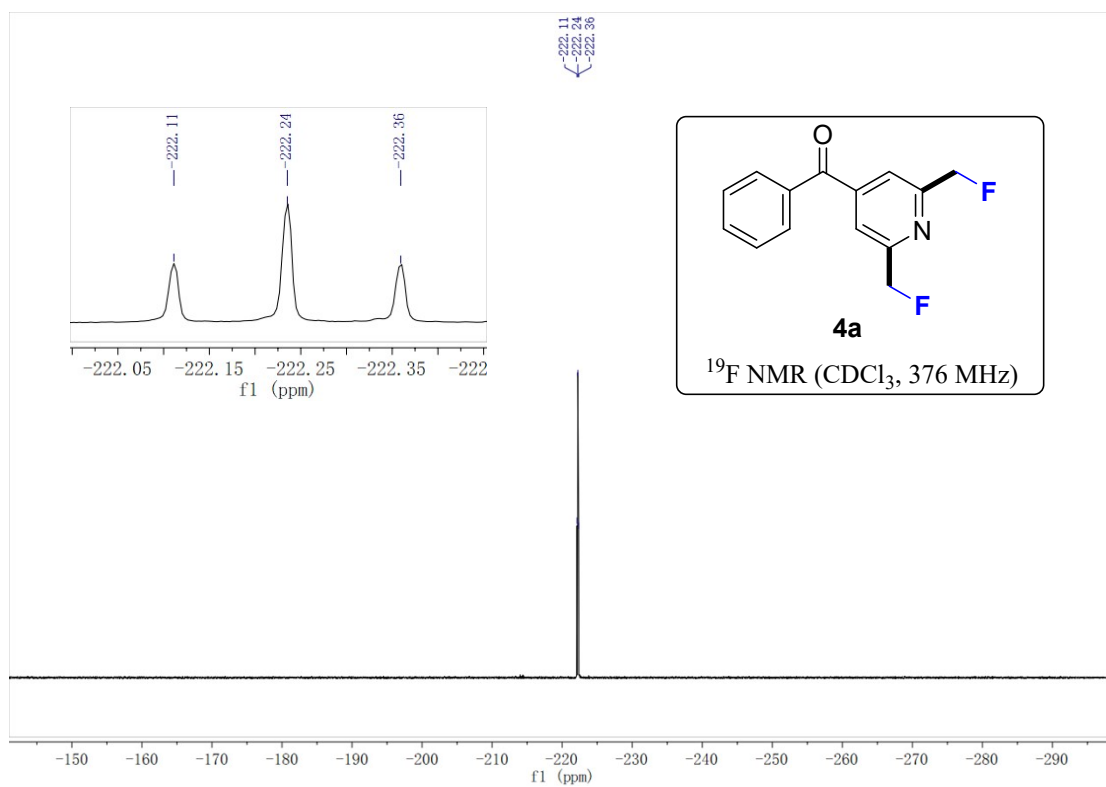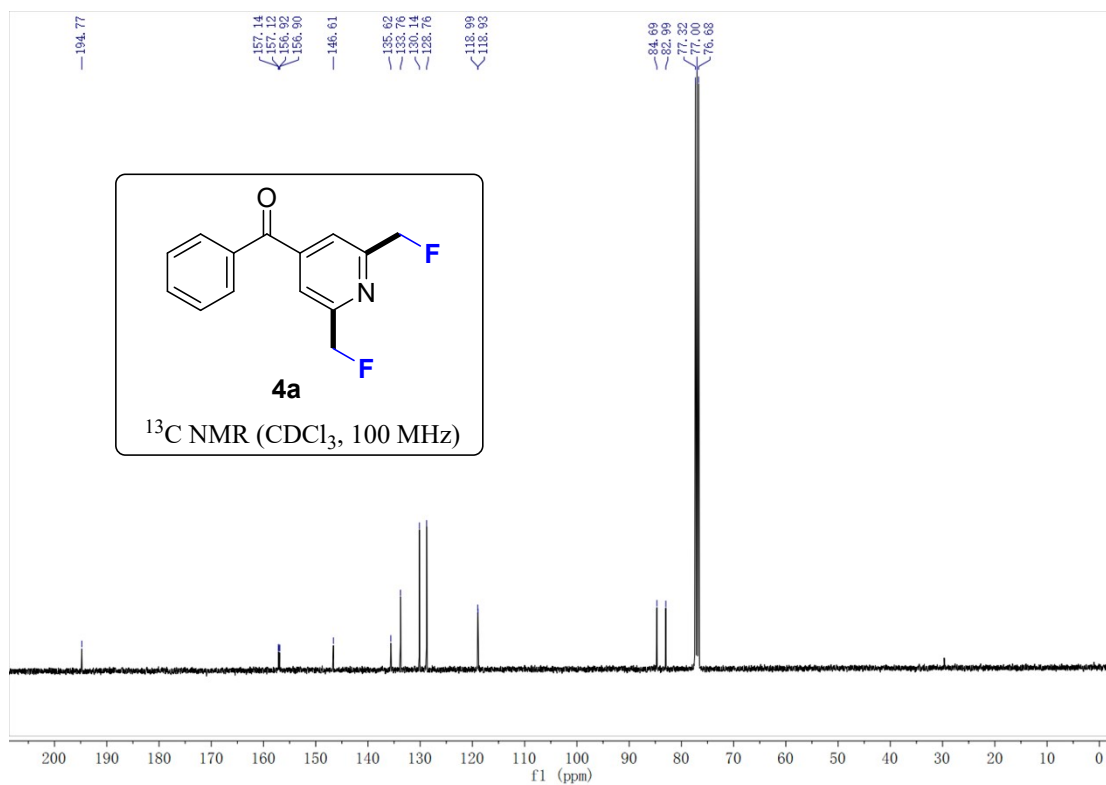

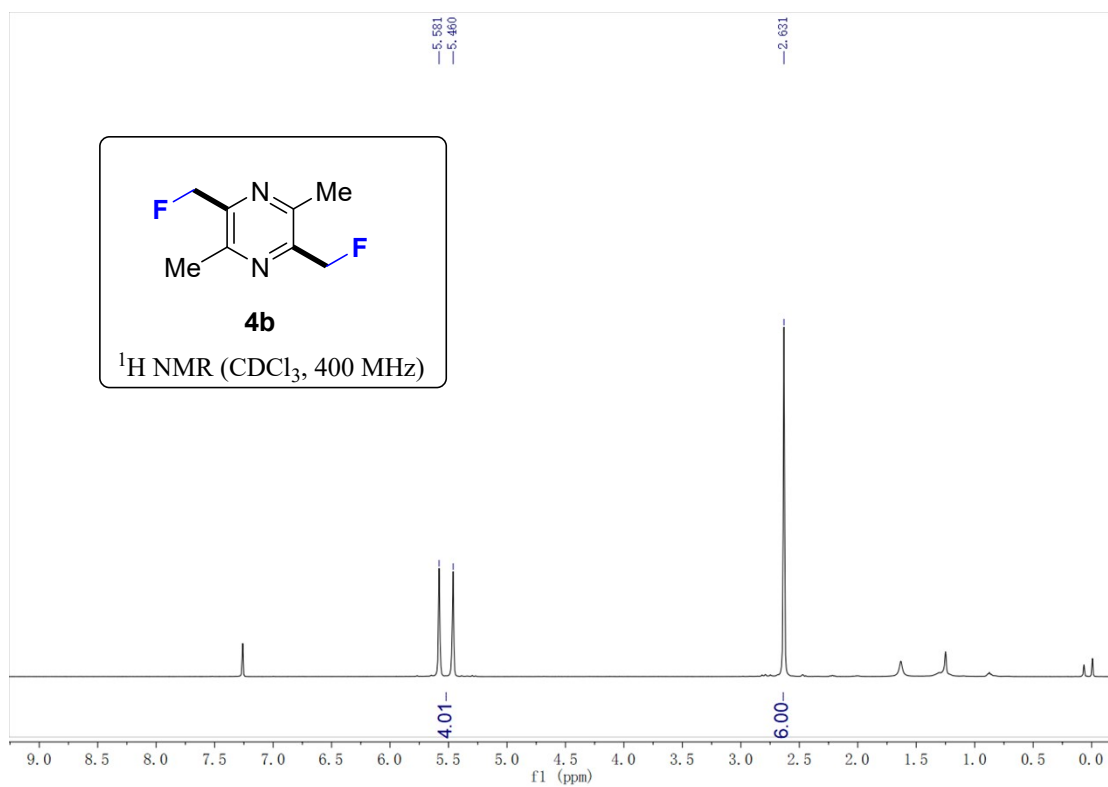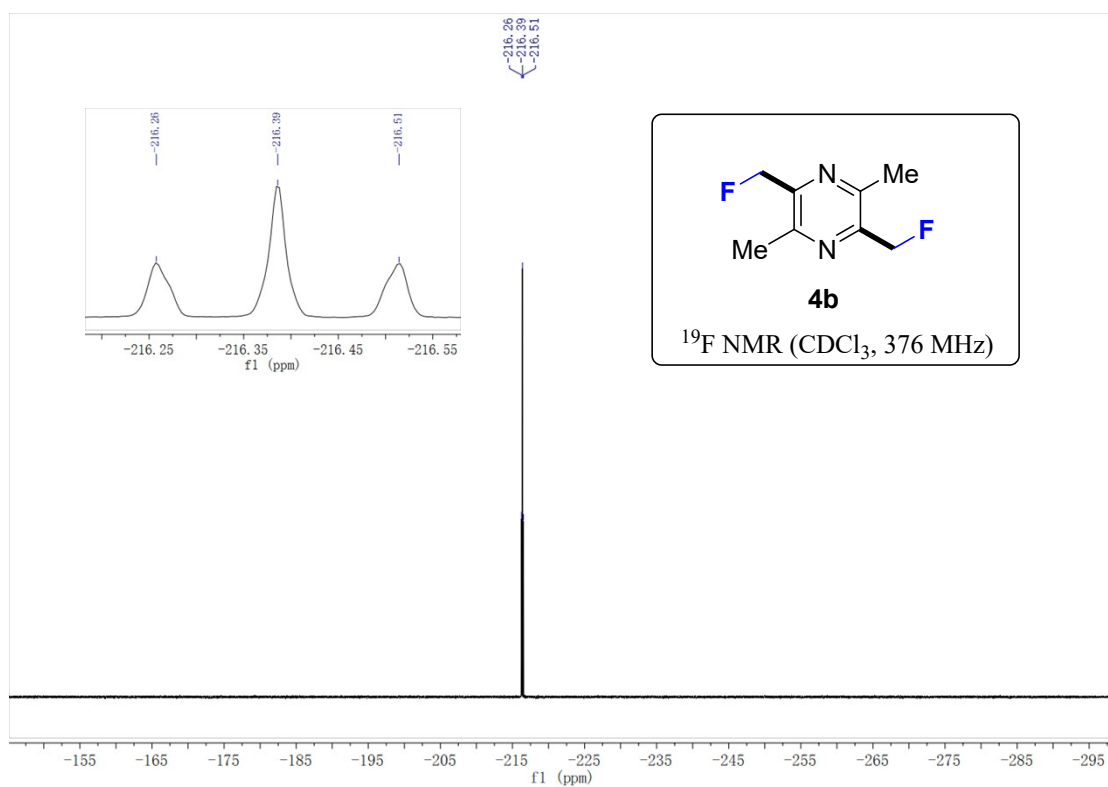

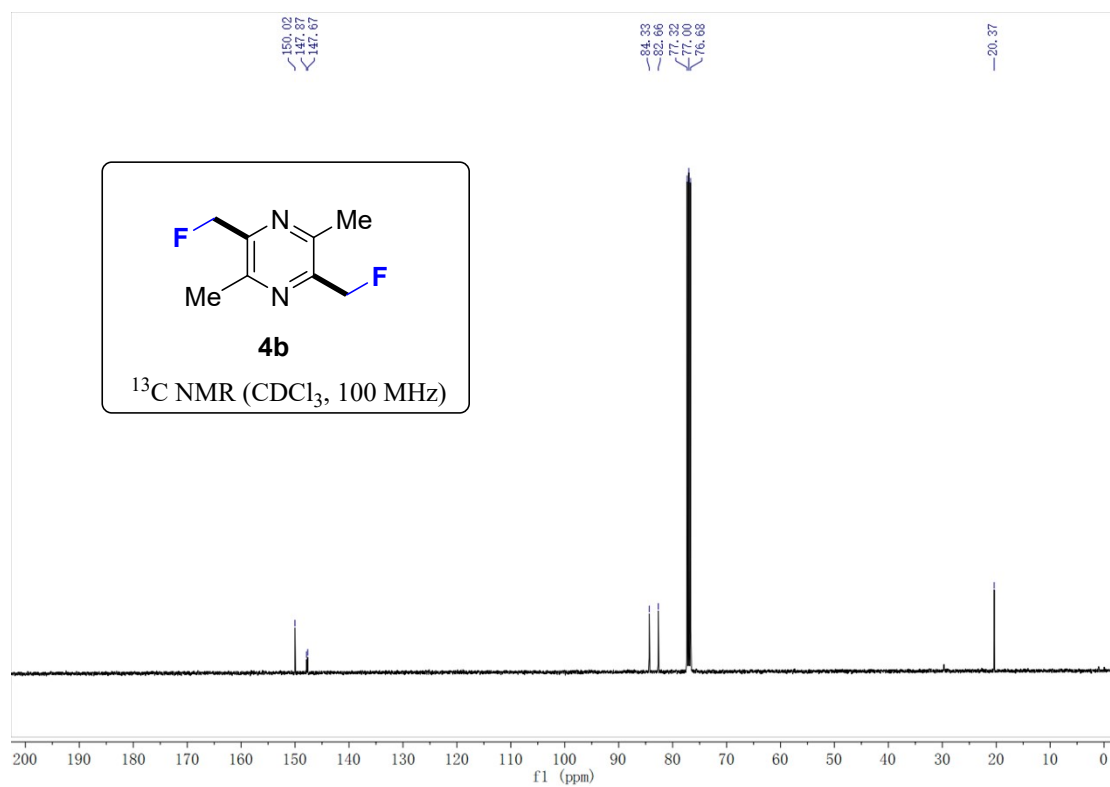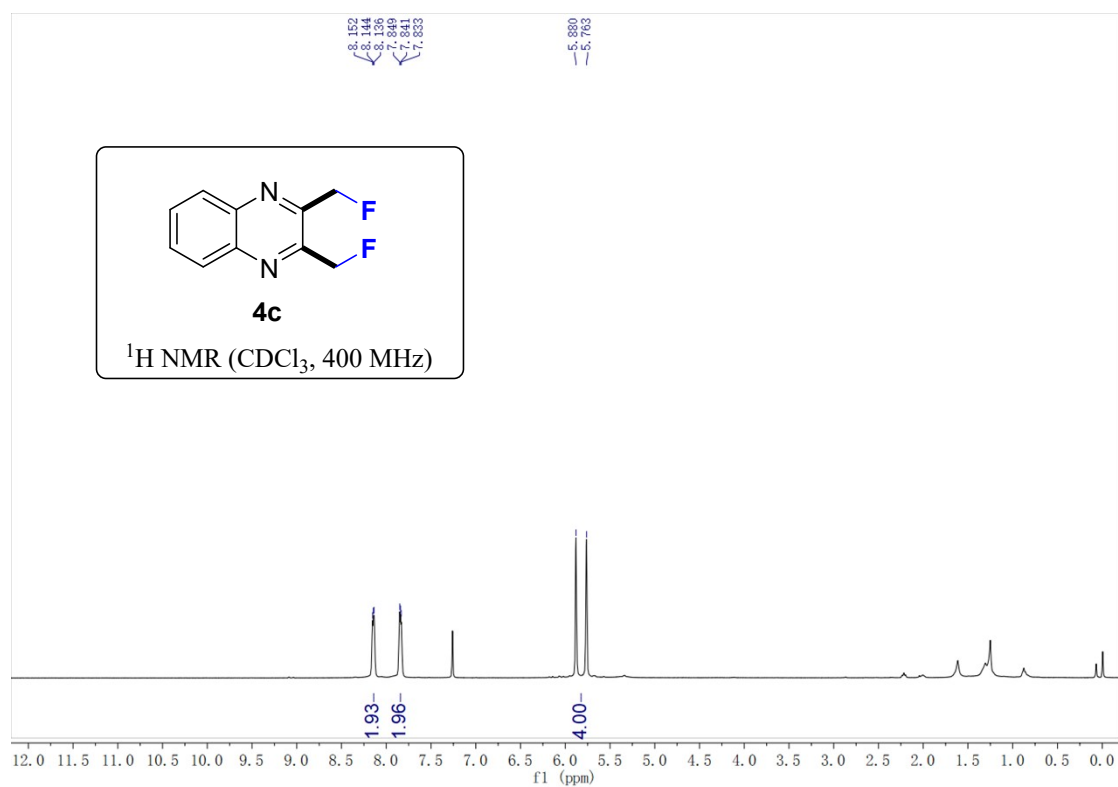



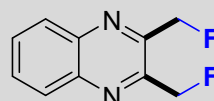

**4c**

$^{19}\text{F}$  NMR ( $\text{CDCl}_3$ , 376 MHz)

148.29  
148.10  
141.32  
131.03  
129.26

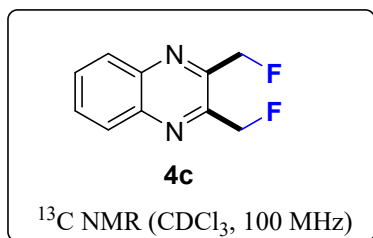

**4c**

$^{13}\text{C}$  NMR ( $\text{CDCl}_3$ , 100 MHz)

84.49  
82.81  
77.32  
77.00  
76.68

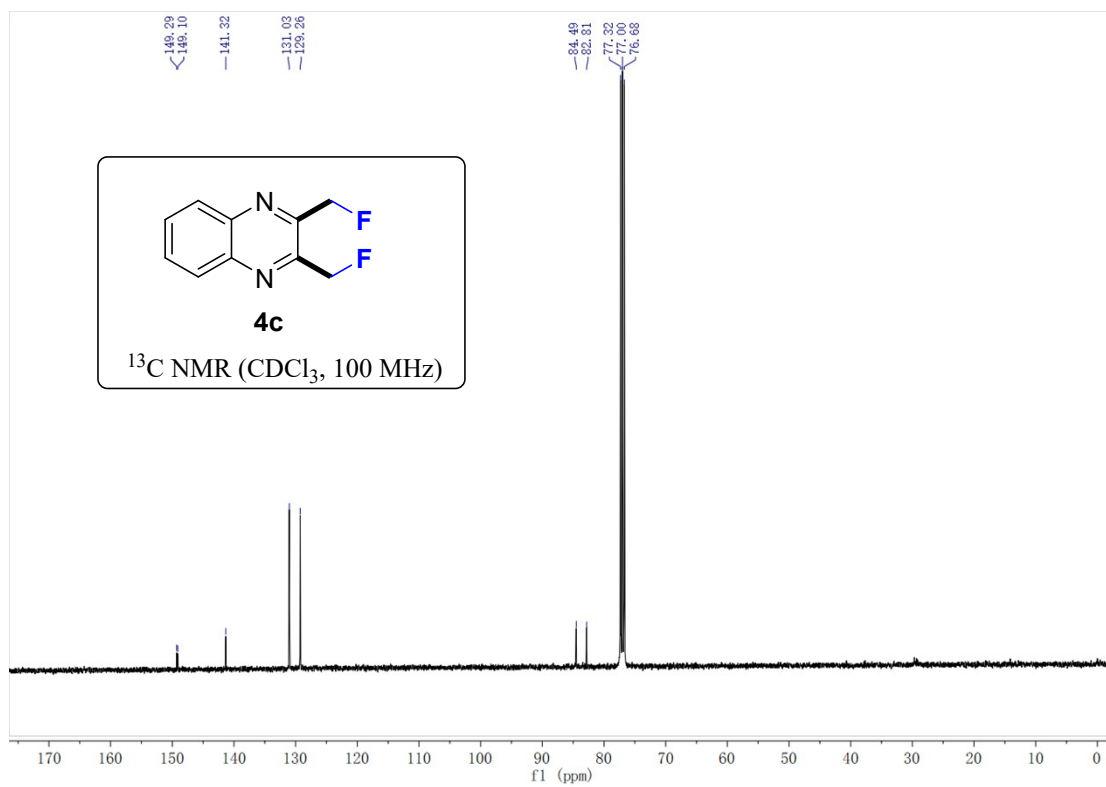

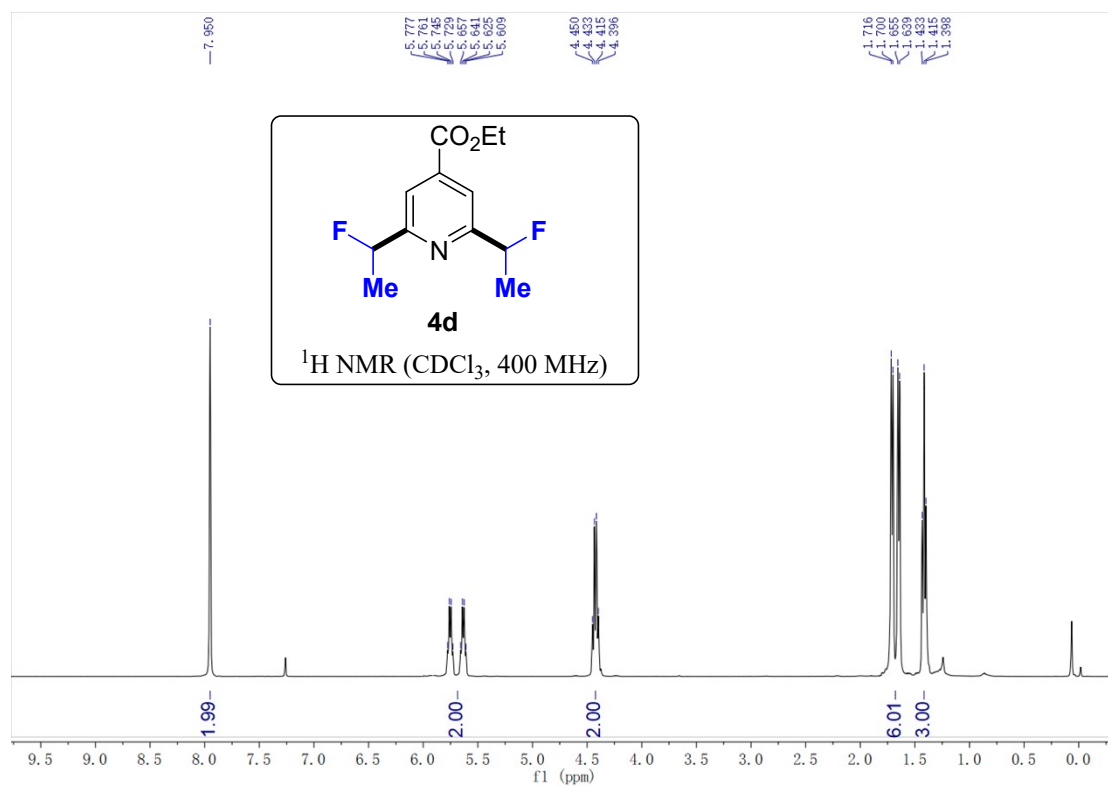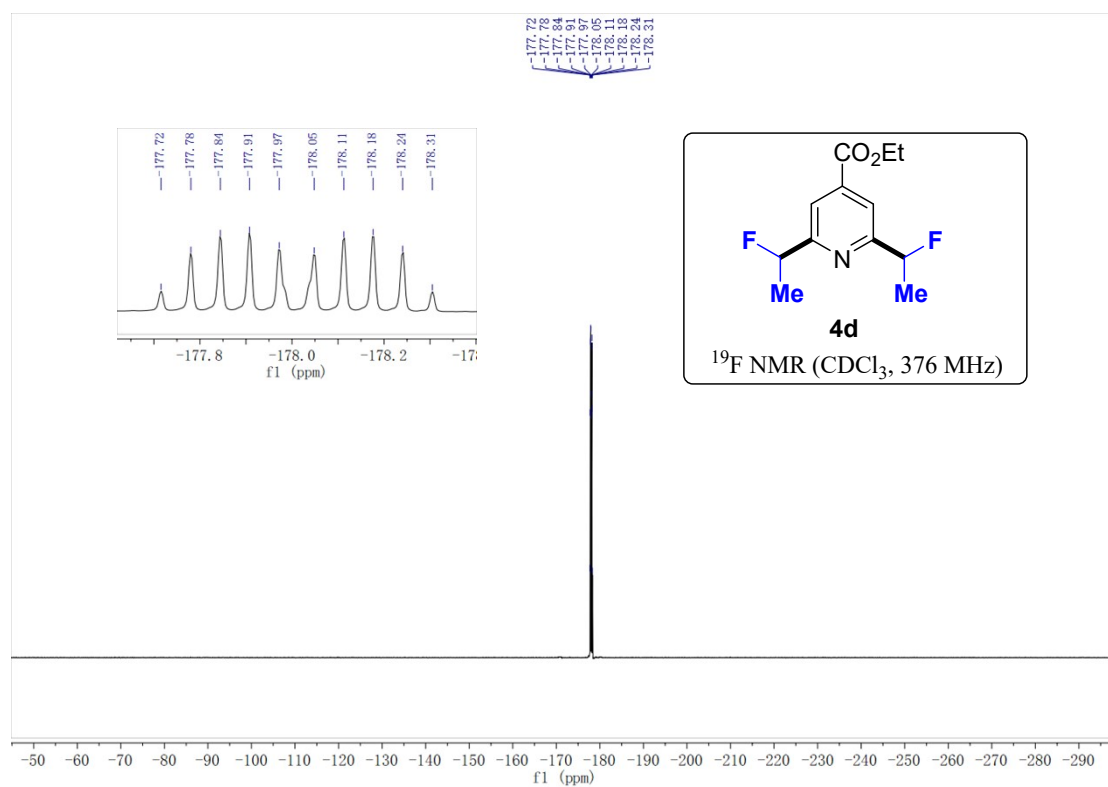

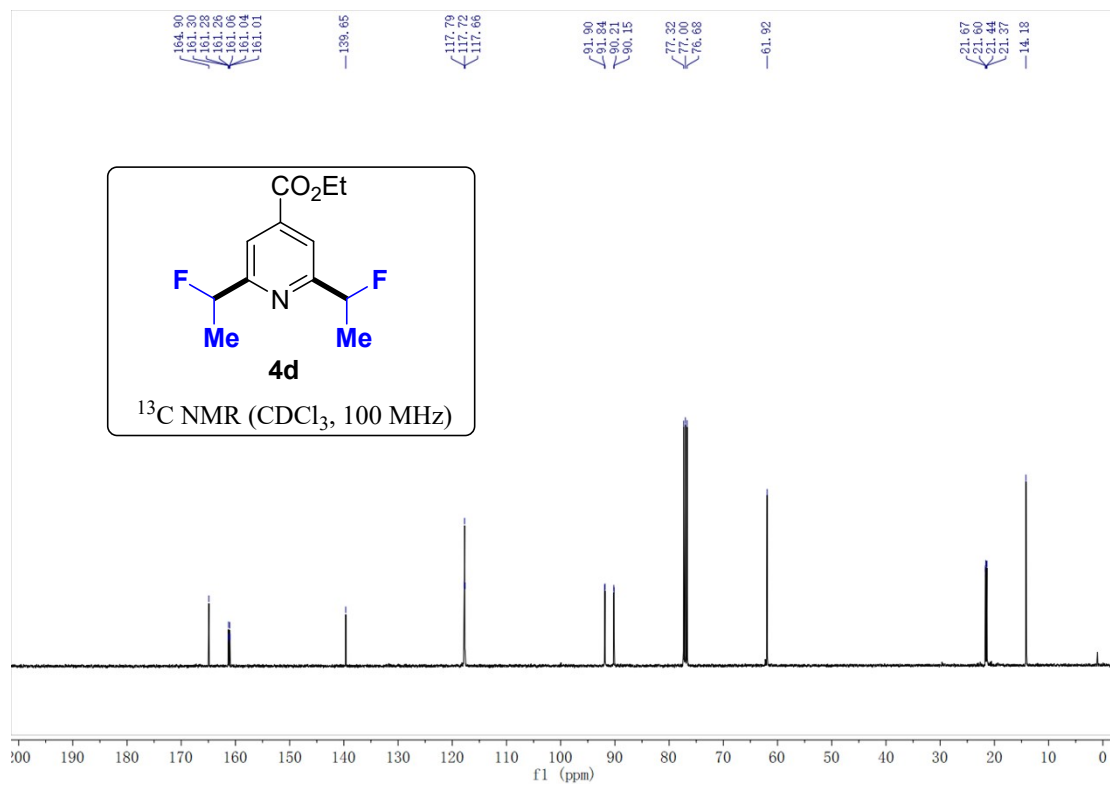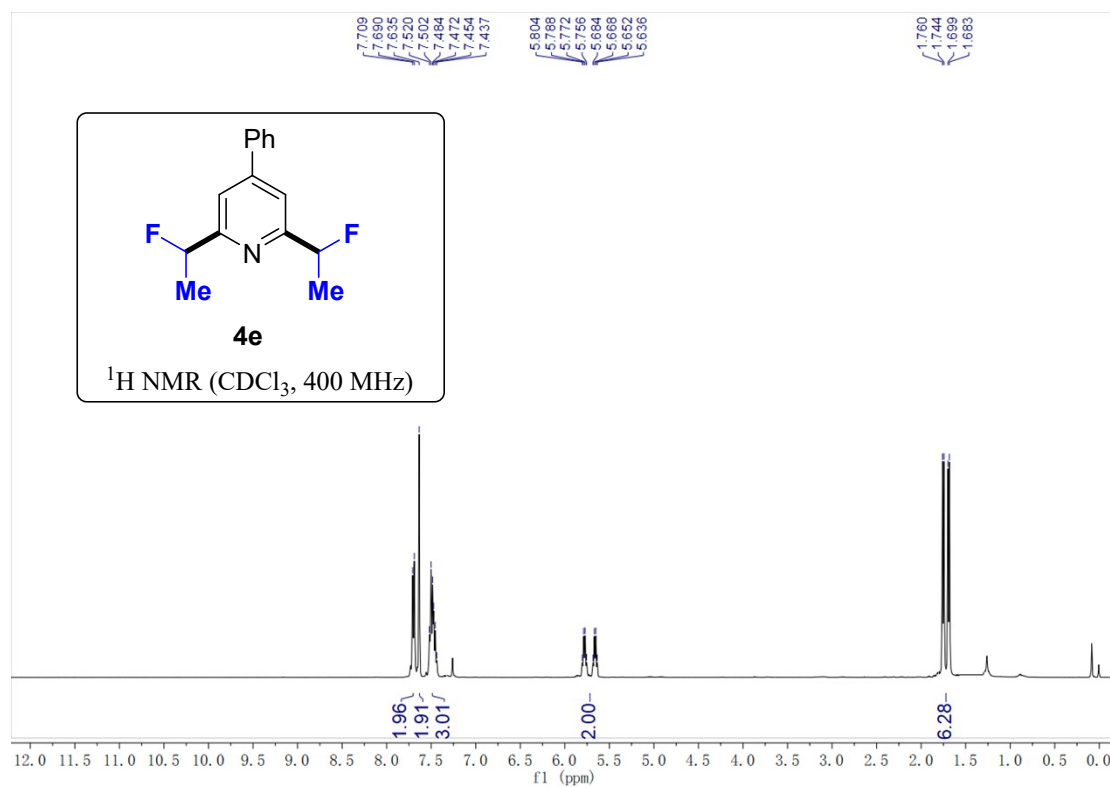

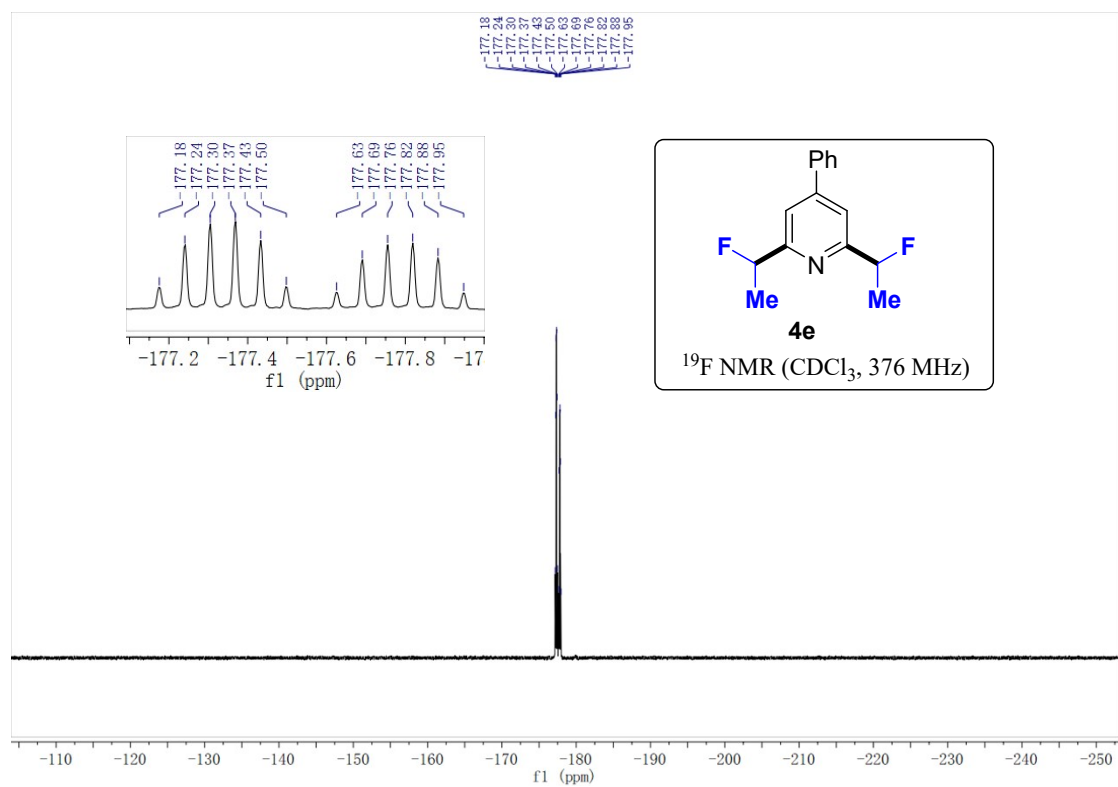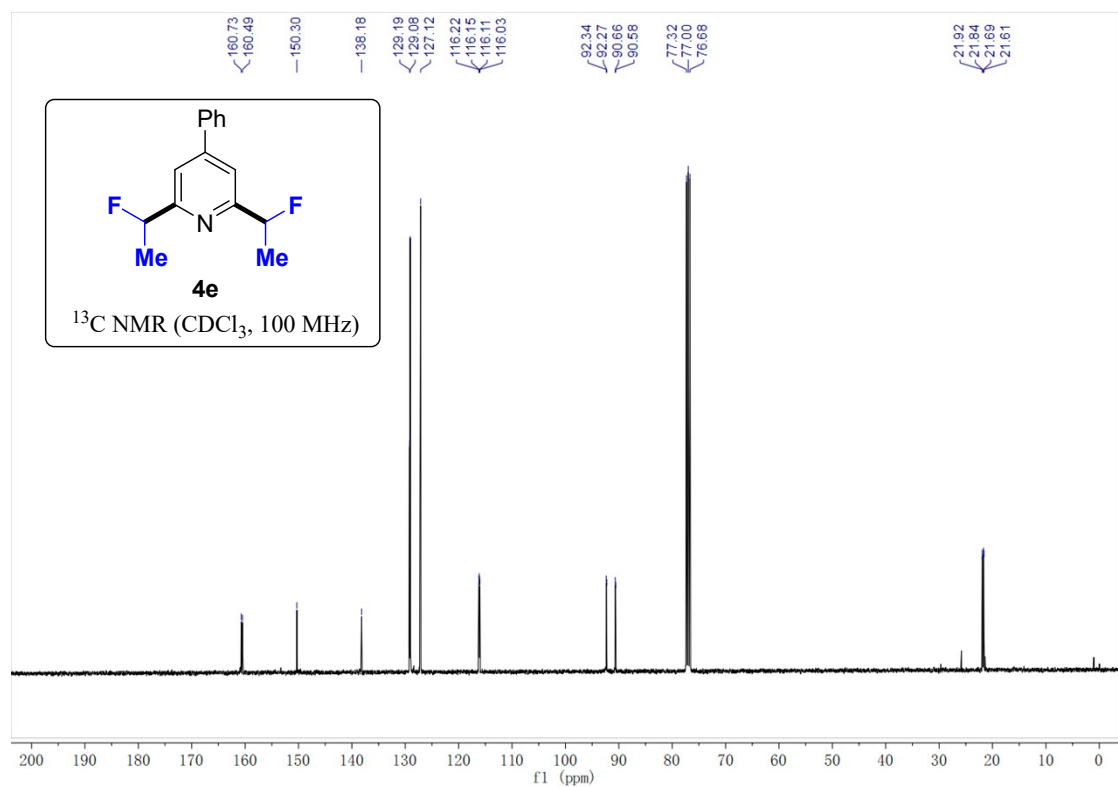

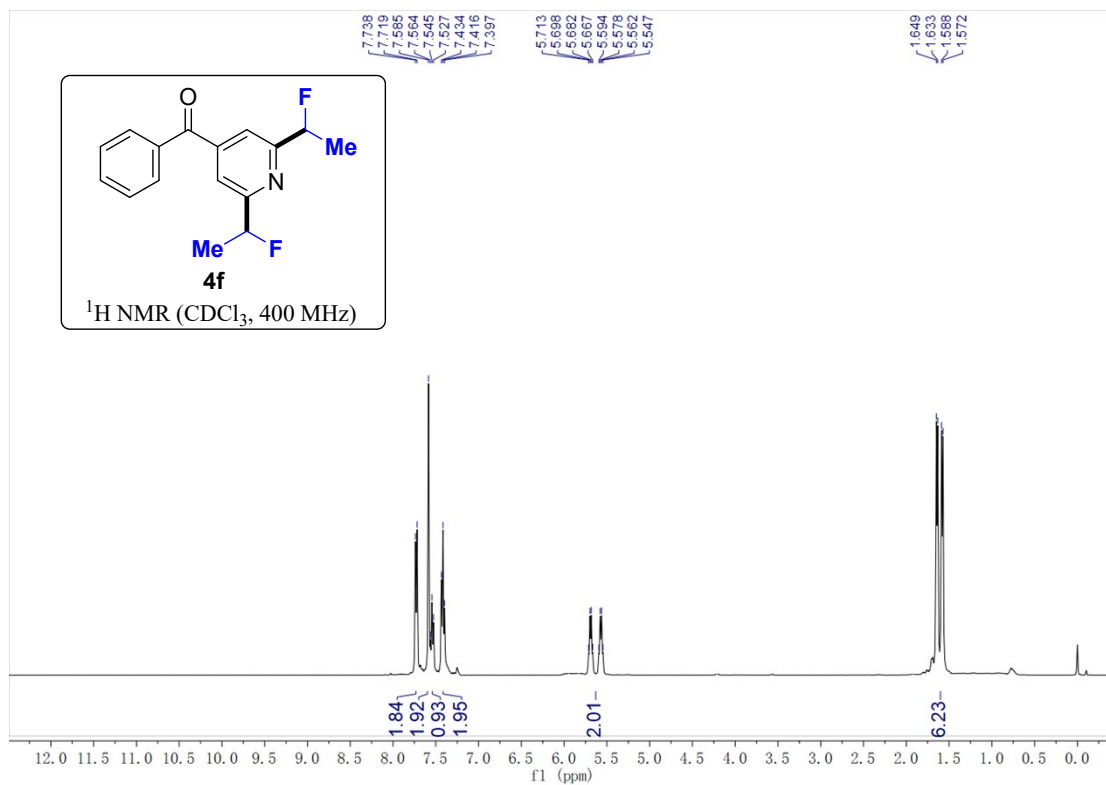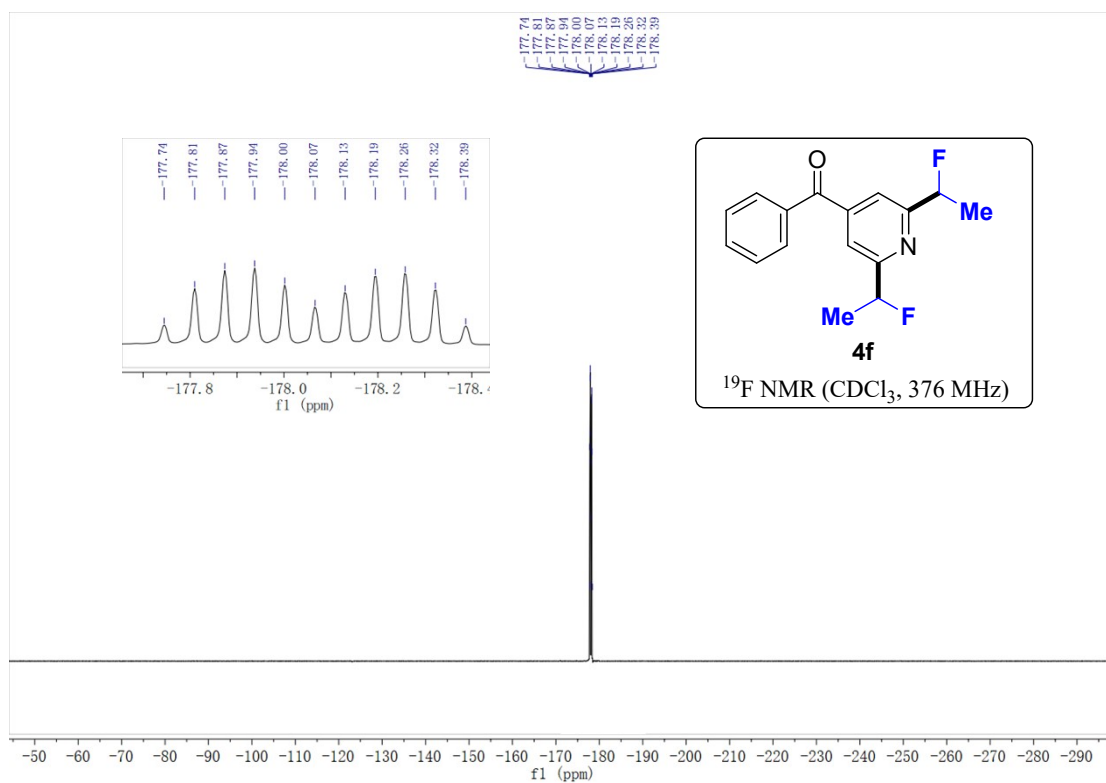

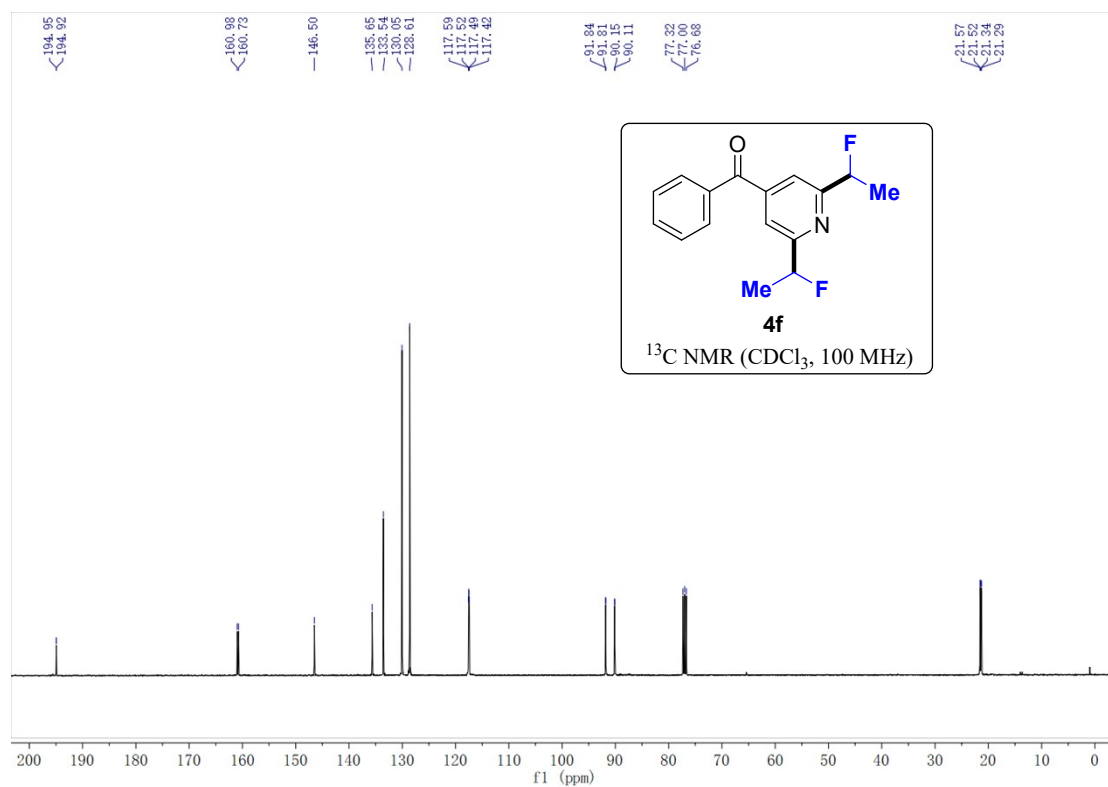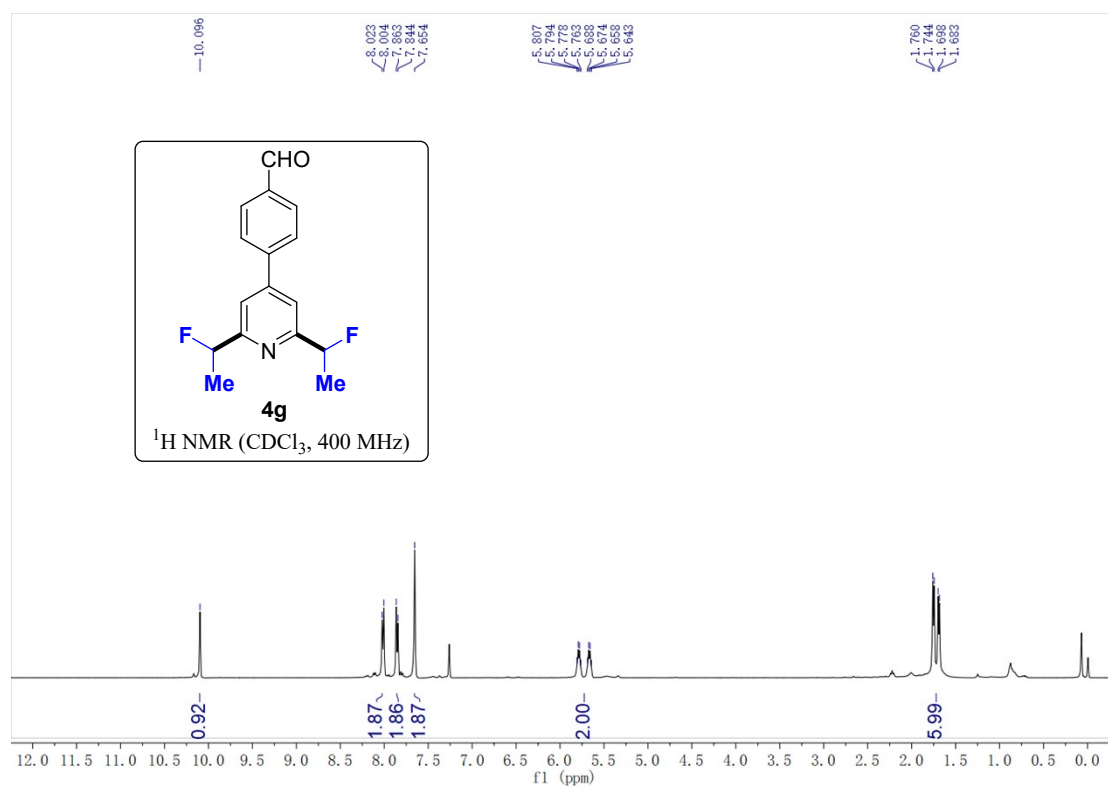

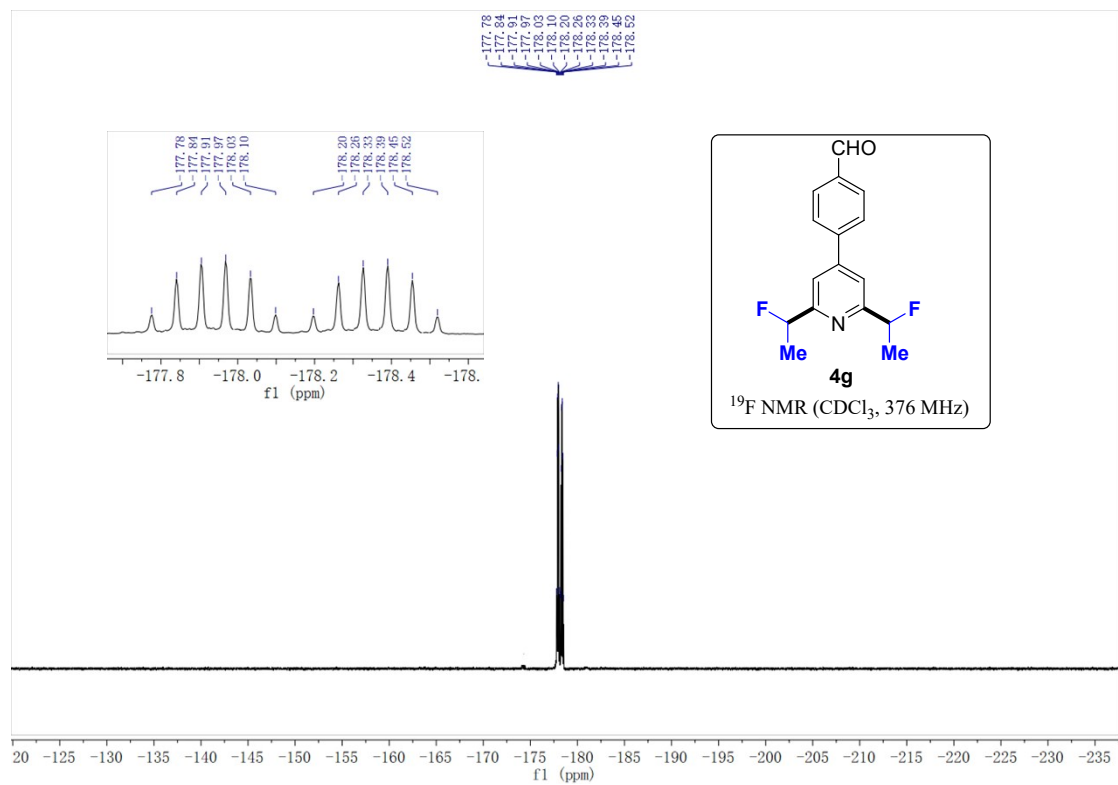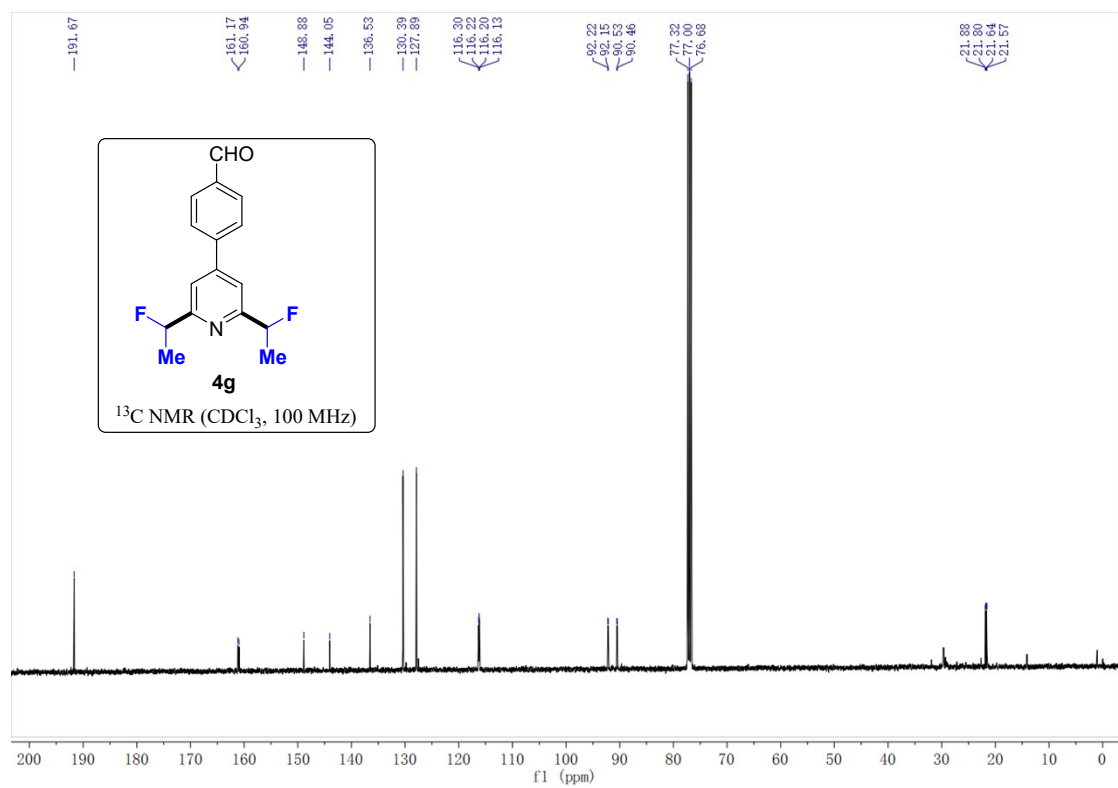

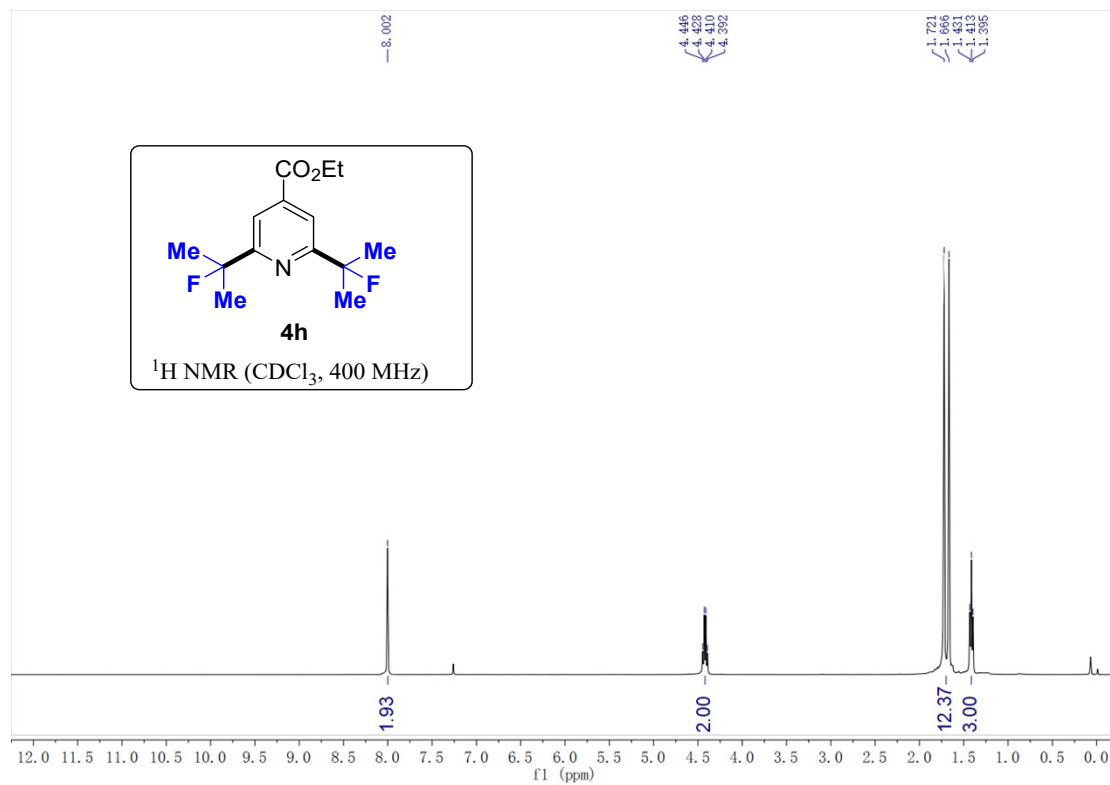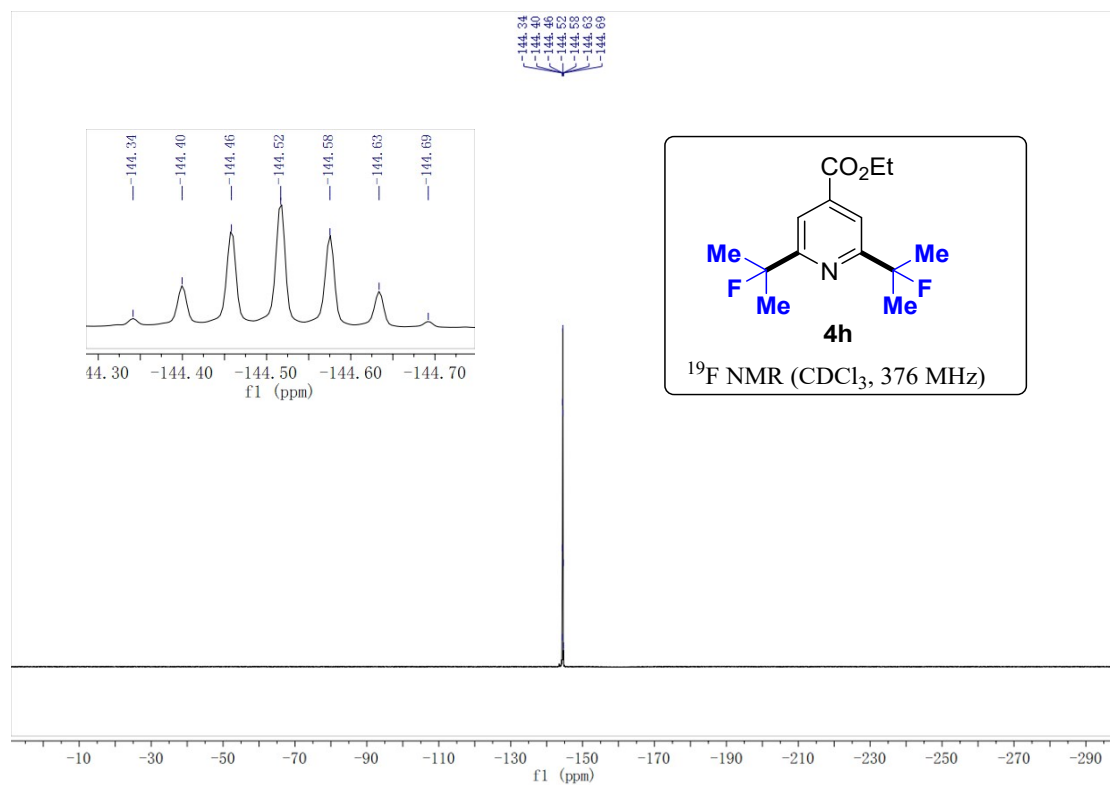



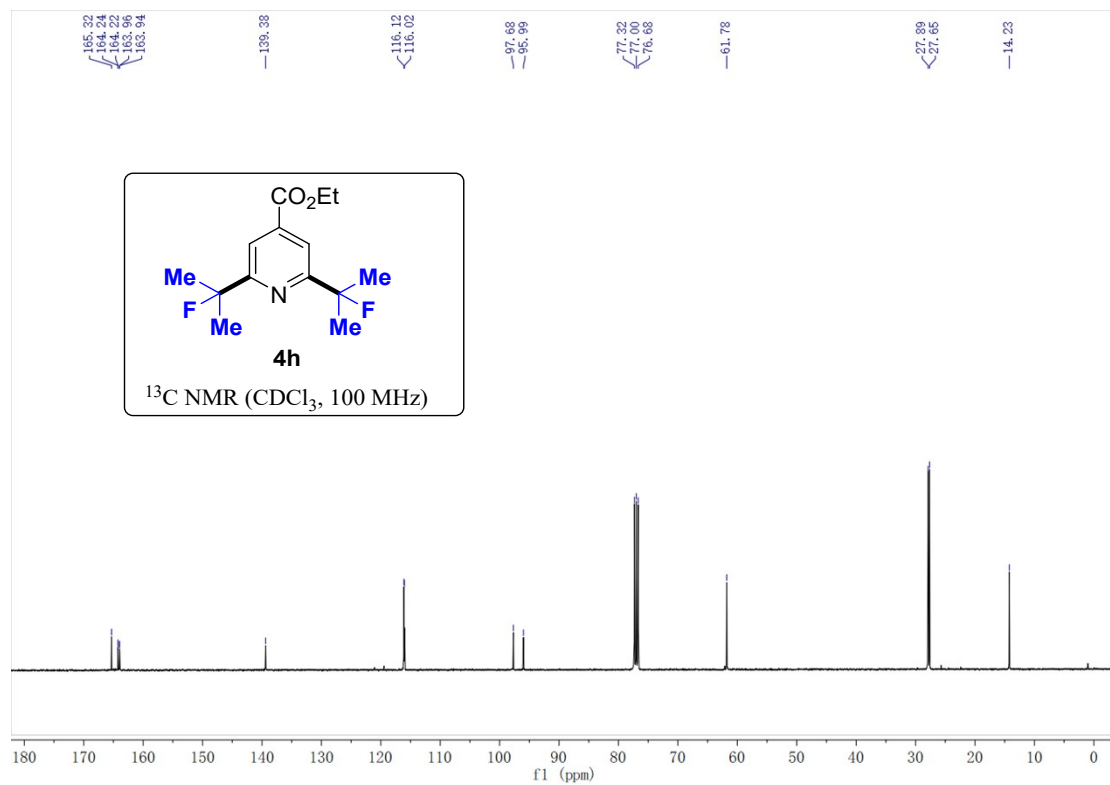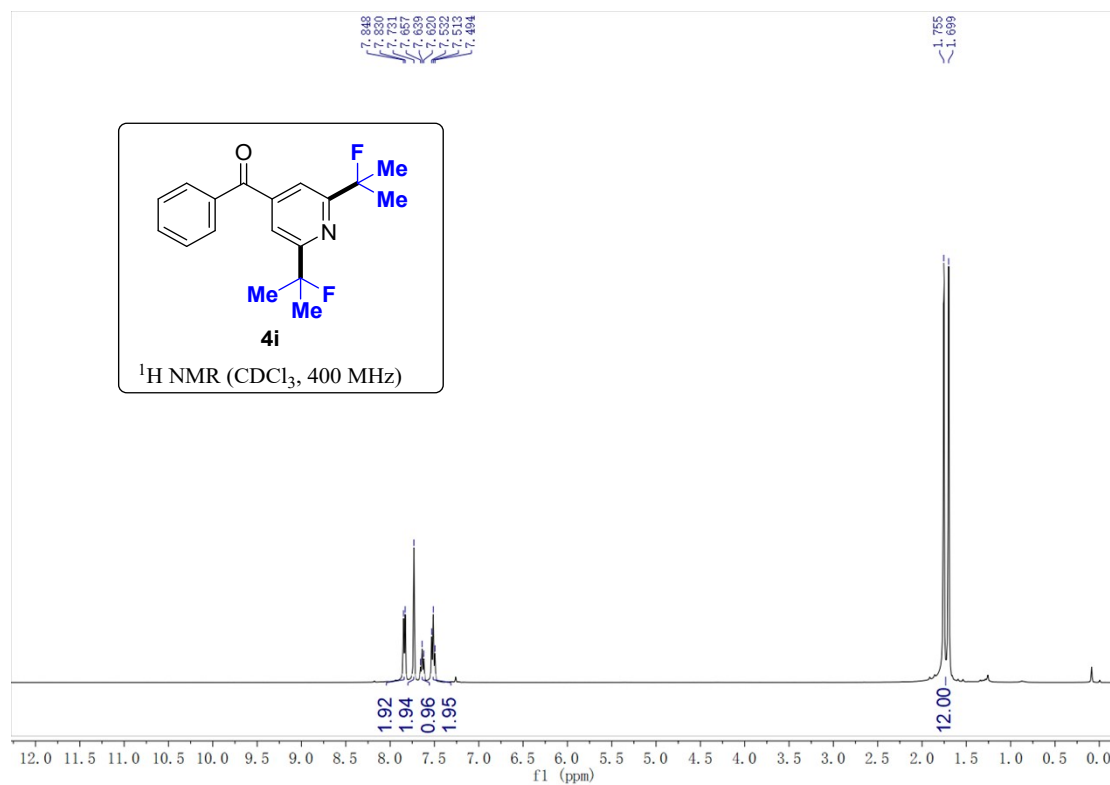

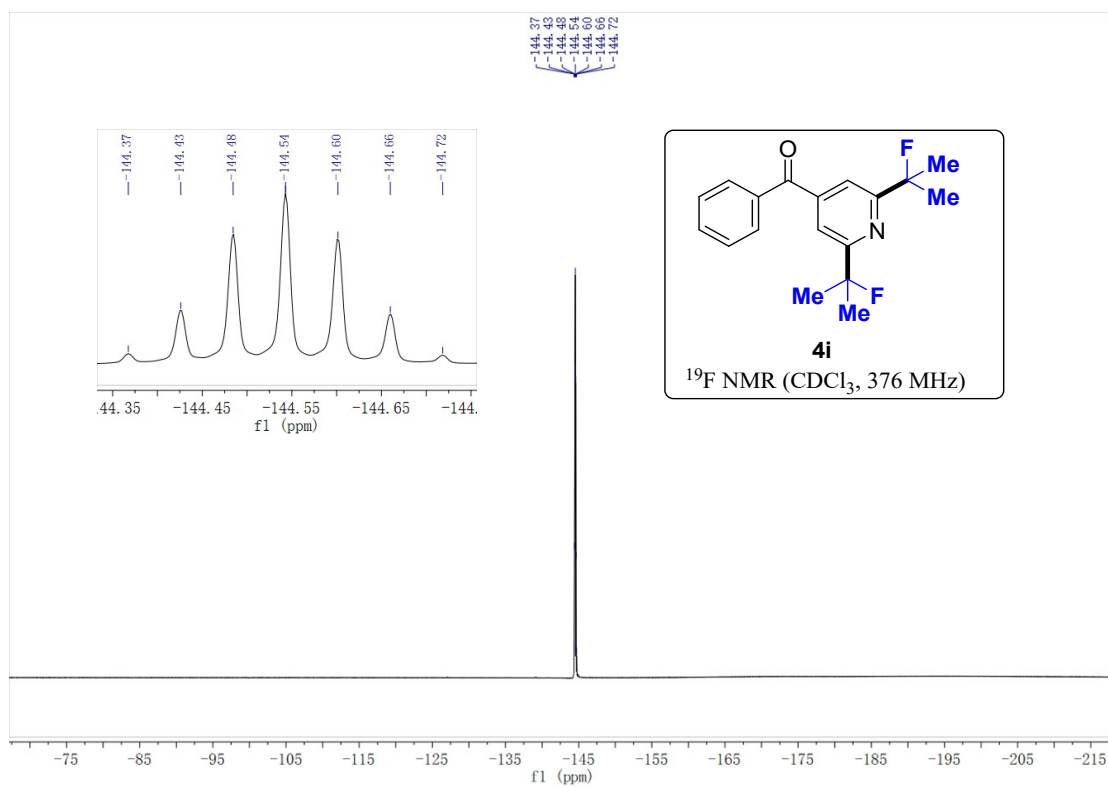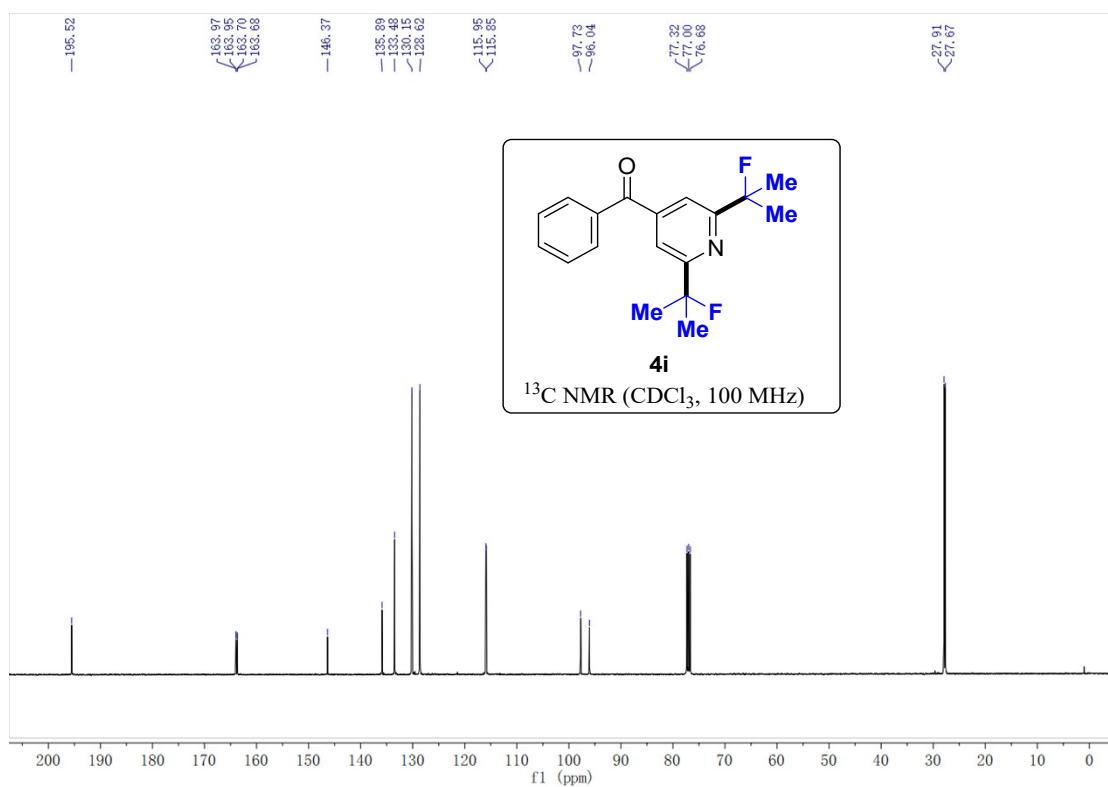

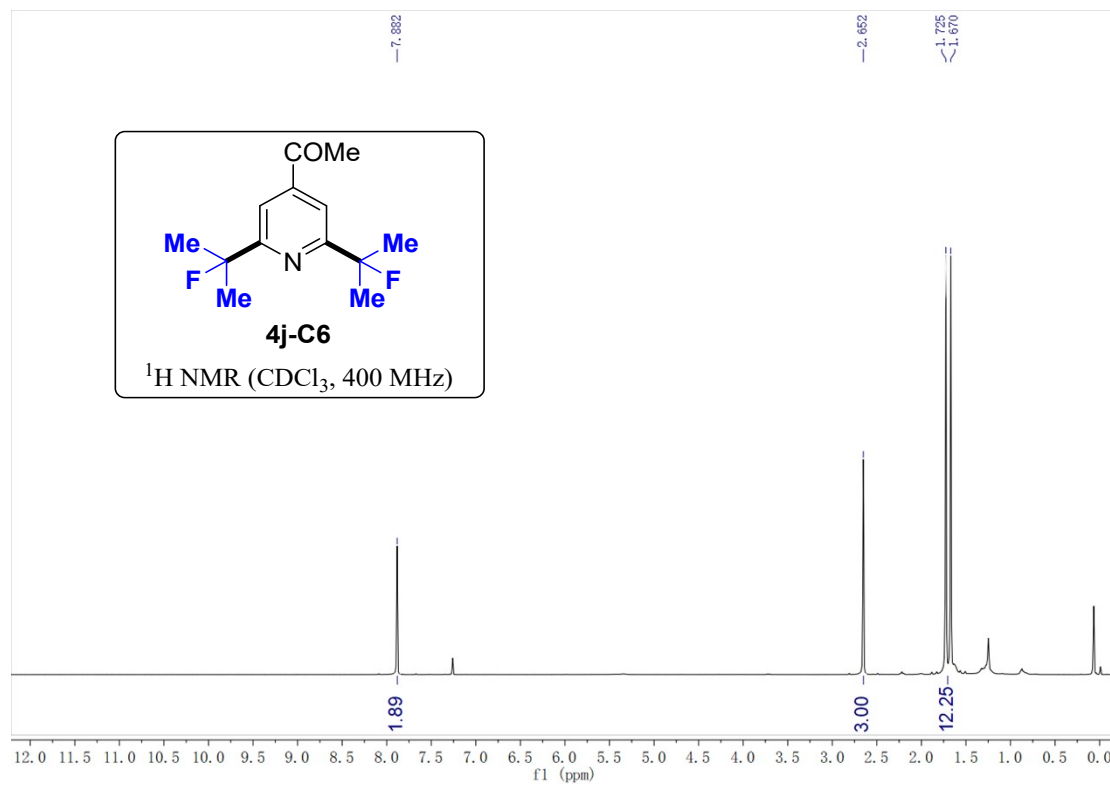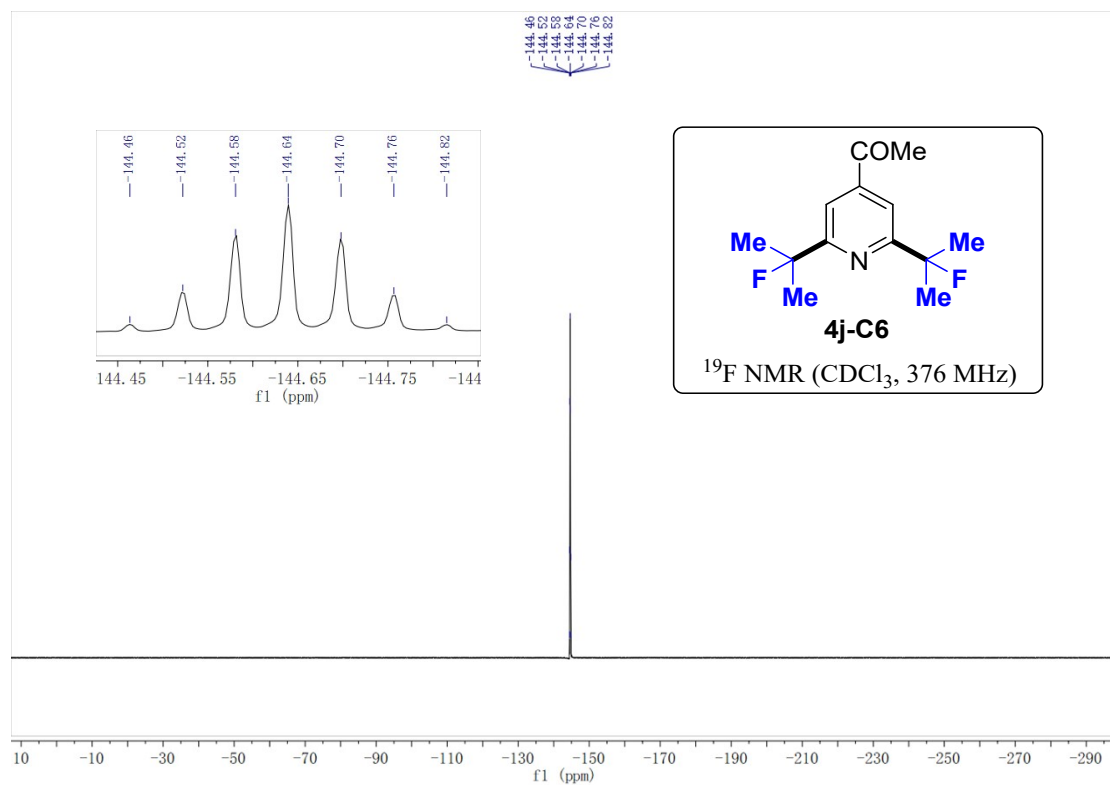

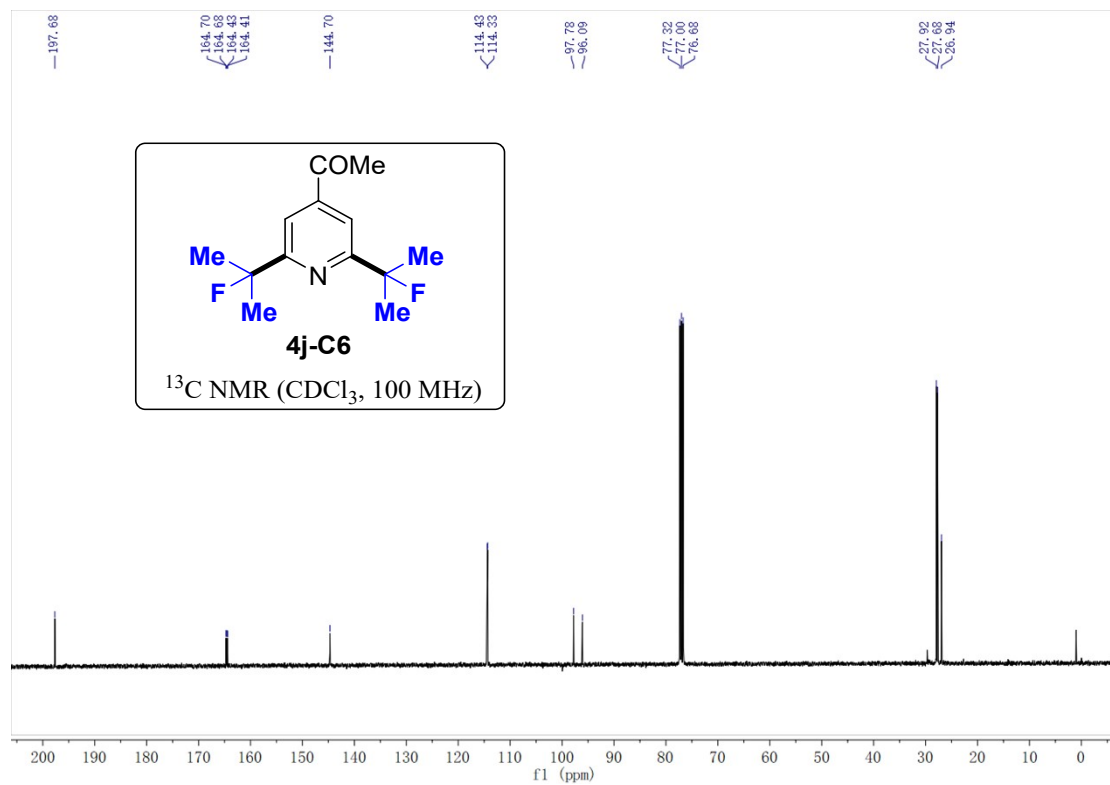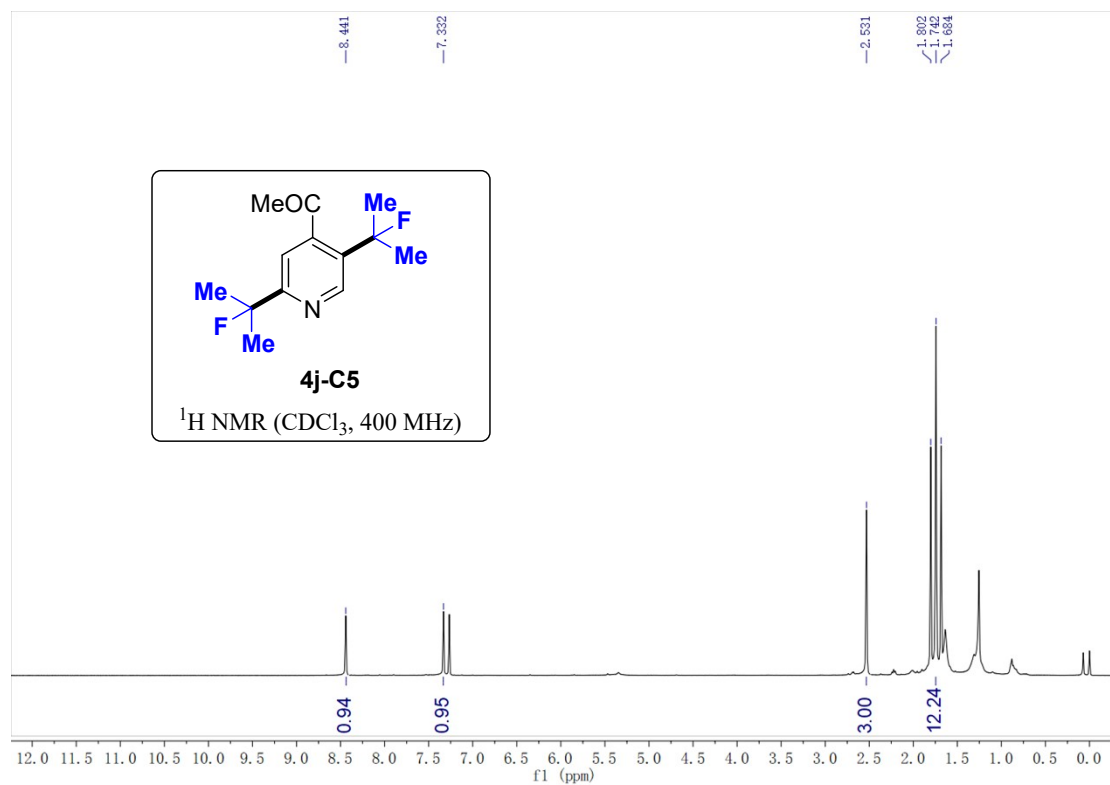

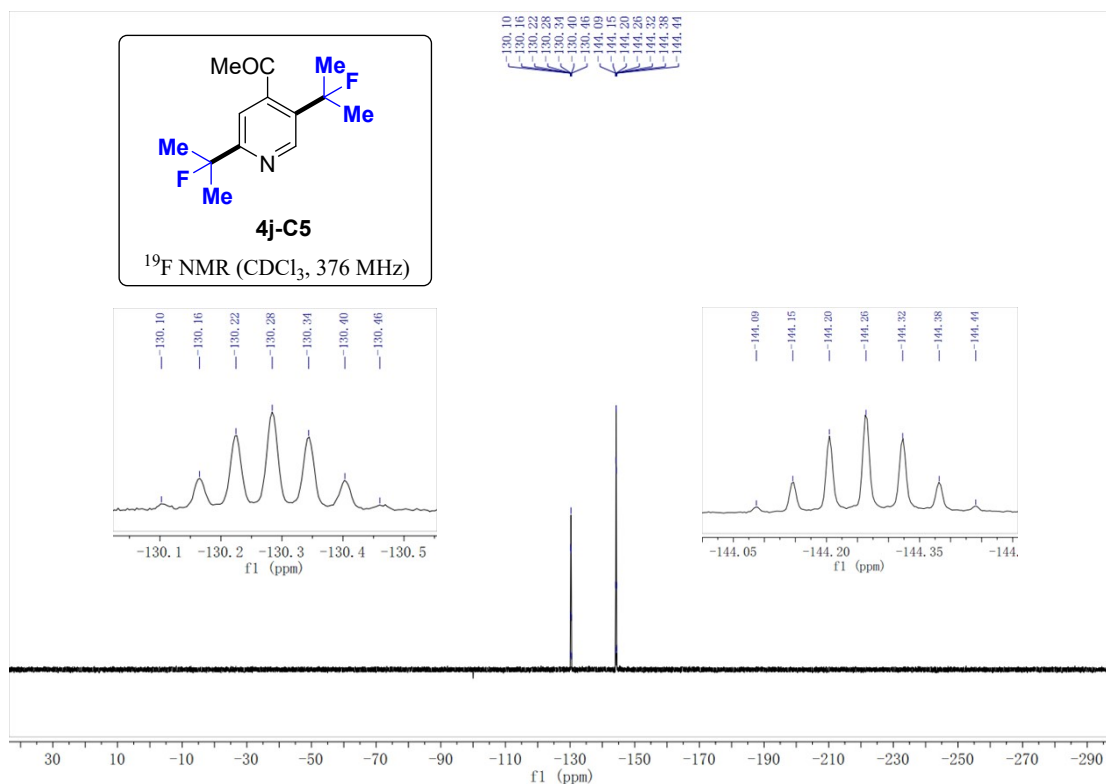

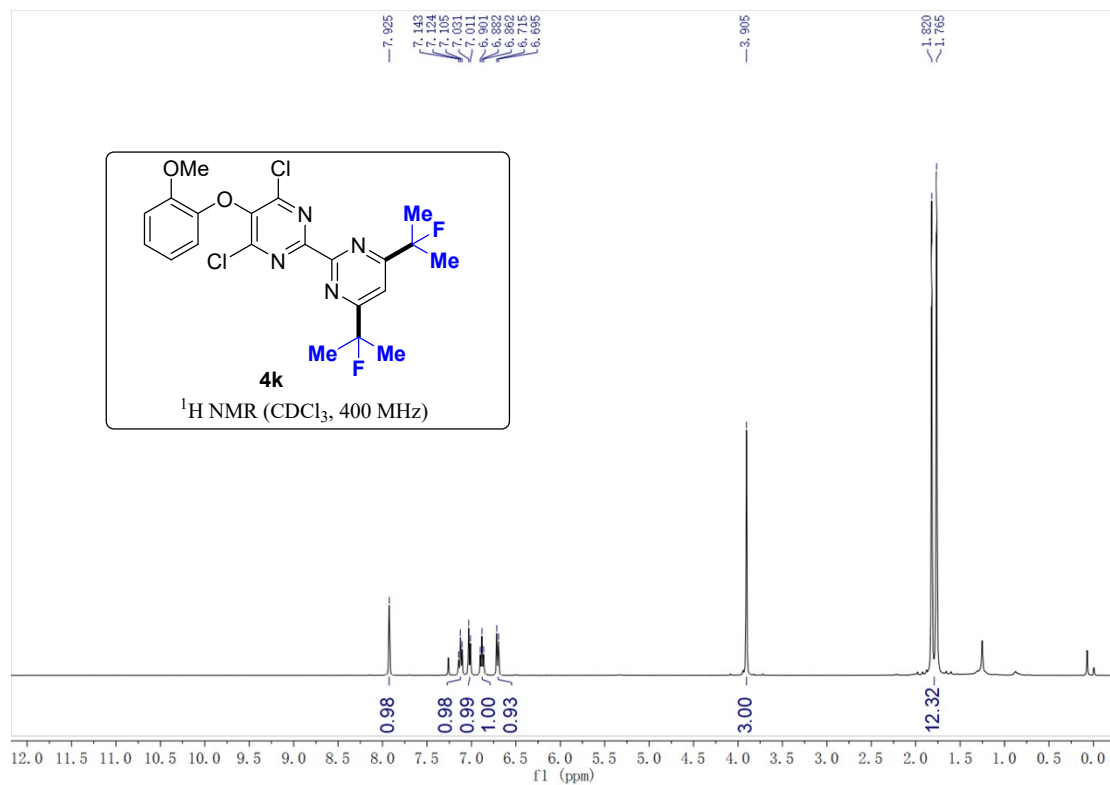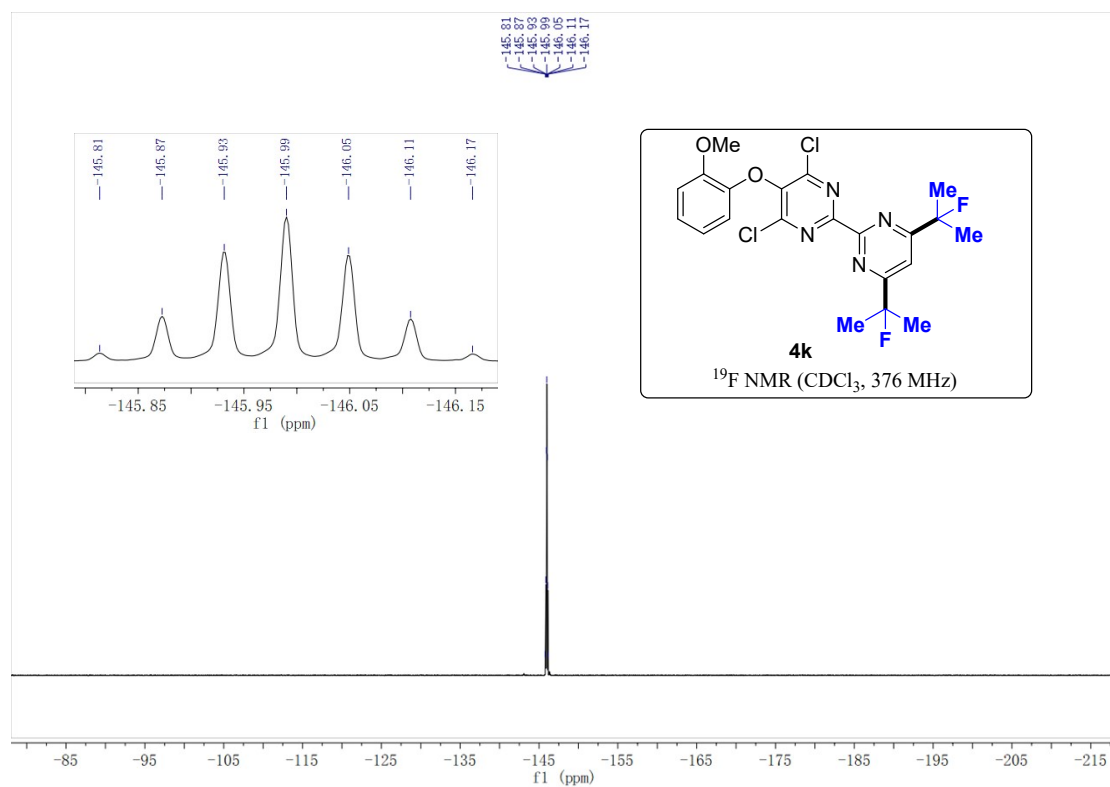

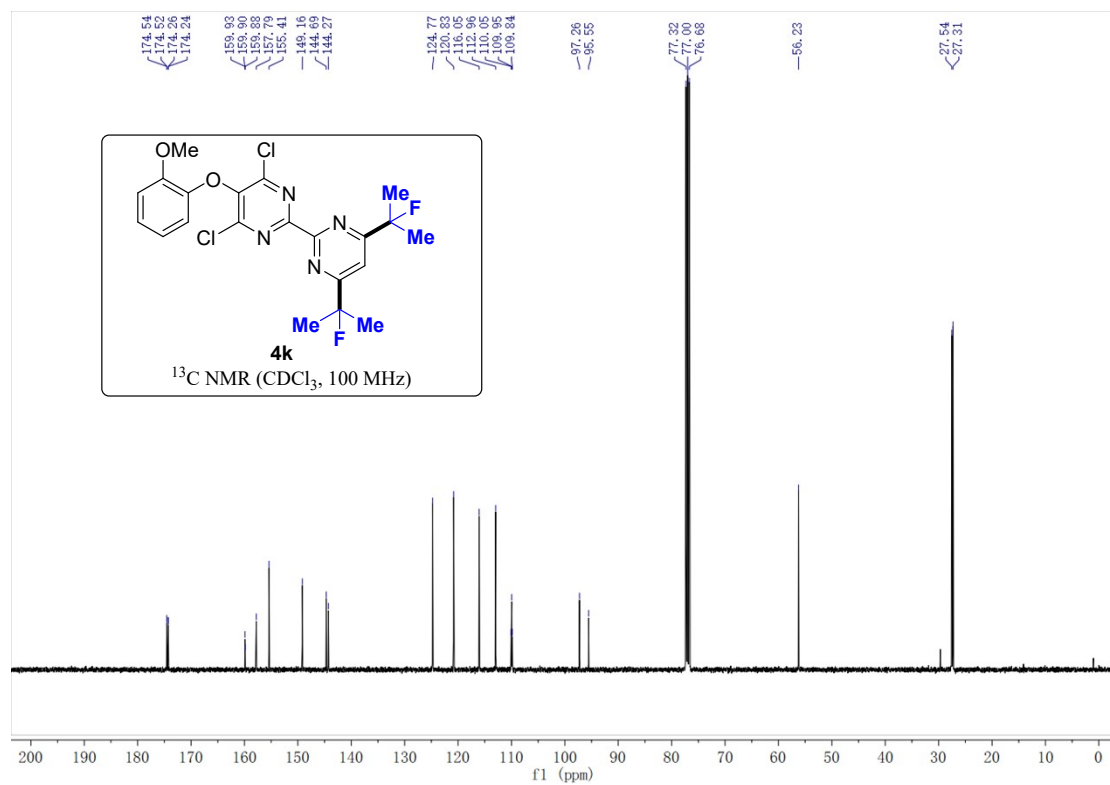

Supplement: d1cc06466e1.pdf [file d1cc06466e1.pdf]
